# Supplementary material for: Homologous recombination–deficient mutation cluster in tumor suppressor RAD51C identified by comprehensive analysis of cancer variants
Source: PubMed Central journal article supplement — Proc Natl Acad Sci U S A. 2022 Sep 13;119(38):e2202727119. doi: 10.1073/pnas.2202727119 (PMC9499524; doi:10.1073/pnas.2202727119), 2022-09-13
Supplement: pnas.2202727119.sapp.pdf [file pnas.2202727119.sapp.pdf]

## Supplementary Information for

### Homologous recombination deficient mutation cluster in tumor suppressor *RAD51C* identified by comprehensive analysis of cancer variants

Rohit Prakash<sup>1,\*,#</sup>, Yashpal Rawal<sup>2,\*</sup>, Meghan R. Sullivan<sup>3,\*</sup>, McKenzie K. Grundy<sup>3</sup>, H el ene Bret<sup>4</sup>, Michael J. Mihalevic<sup>3</sup>, Hayley L. Rein<sup>3</sup>, Jared M. Baird<sup>3</sup>, Kristie Darrah<sup>3</sup>, Fang Zhang<sup>1,5</sup>, Raymond Wang<sup>1</sup>, Tiffany A. Traina<sup>6</sup>, Marc R. Radke<sup>7</sup>, Scott H. Kaufmann<sup>8</sup>, Elizabeth M. Swisher<sup>7</sup>, Rapha el Gu erois<sup>4</sup>, Mauro Modesti<sup>9</sup>, Patrick Sung<sup>2</sup>, Maria Jasin<sup>1,#</sup>, Kara A. Bernstein<sup>3,#,^</sup>

Co-corresponding authors: Rohit Prakash, Maria Jasin, Kara Bernstein

Email: [rohitpraka@gmail.com](mailto:rohitpraka@gmail.com), [m-jasin@ski.mskcc.org](mailto:m-jasin@ski.mskcc.org), [karab@pitt.edu](mailto:karab@pitt.edu)

#### This PDF file includes:

Supplemental Materials and Methods  
Figures S1 to S8  
Tables S1 to S5  
SI References

#### Other supplementary materials for this manuscript include the following:

Tables S6

## Supplemental Materials and Methods

### Mutational predictive analysis through PolyPhen-2, SIFT, and PROVEAN

Polymorphism Phenotyping version 2 (PolyPhen-2), Sorting Intolerant From Tolerant (SIFT; RRID:SCR\_012813), and Protein Variation Effect Analyzer (PROVEAN; RRID:SCR\_002182), were used to predict the functional effects of the amino acid substitution for each variant. Variants with PolyPhen-2 scores  $\geq 0.957$  is considered probably damaging, while  $< 0.957$  is considered possibly damaging or benign (1). In SIFT, variants with a binary cutoff of  $< 0.05$  is damaging, while  $\geq 0.5$  is tolerated (2). Variants with PROVEAN scores  $\leq -2.5$  are considered deleterious, while  $> -2.5$  are considered neutral (3, 4). To coalesce the results from all three tools, a binary number system was used to reclassify the scores. Variants predicted to “probably damaging”, “damaging”, or “deleterious” were given a score of 1 while variants predicted to be “benign”, “possibly damaging”, “tolerated” or “neutral” were given a score of 0. Binary scores from each of the predictive algorithms were added together to calculate a total predictive score.

### Cell Lines Used

The cell lines used in this study are MCF10A and U2OS. U2OS and MCF10A RAD51C mutant cell line derivatives were authenticated using STR DNA profiling as described (5). The U2OS RAD51C mutant cell line is available at the Leibniz Institute DSMZ, German Collection of Microorganisms and Cell Culture.

### MCF10A clonogenic assays and HR analysis

MCF10A *RAD51C* conditional cells (5), which contain an integrated DR-GFP reporter (6), were grown in DMEM HG/F-12 supplemented with 5% horse serum, 1% penicillin and streptomycin, 100 ng/ml cholera toxin, 20 ng/ml epidermal growth factor, 0.01 mg/ml insulin, and 500 ng/ml hydrocortisone at 37°C with 5% CO<sub>2</sub> atmosphere. RAD51C-WT and variants were generated in the conditional MCF10A cells as described, using lentiviral transduction of pRP6 vectors (RRID:Addgene\_51740), which were derived from pWZL-hygro (5). Cells were seeded at 100,000 cells per well in a 6-well plate 24 hours before infection. The next day, cells were treated with self-deleting Lenti-Cre, as described (6). The following day virus was removed, cells were washed with PBS and incubated another 24 hours in MCF10A media before use.

For clonogenic survival, cells were seeded at 1000 or 2000 cells on 10-cm dishes 48 hours after Lenti-Cre transduction. Cells were incubated for 10 days and fixed in 100% methanol. Plates were stained with Giemsa, and colonies were counted. For genotyping post-Cre expression, colonies were transferred from a 10-cm plate into a 96-well plate and then expanded in a 24-well plate. Genomic DNA was extracted from cells in 24-well plates. PCR was performed for the LoxP flanked *RAD51C* at the *AAVS1* locus with the following primers: Oligo4, 5'ATTGTGCTGTCTCATCATTTTGGC (forward) (6); HR-3R, 5'CTGGGATACCCCGAAGAGTG (reverse) (7). Expected PCR product sizes are ~2.5 kb before Cre expression and ~1.3 kb after Cre deletion.



For HR analysis after Cre expression, 50,000 cells per well were seeded in 24-well plates. The next day, cells were infected with an I-SceI-expressing lentivirus (6), and two days later, GFP positive cells were measured by flow cytometry (BD FACScan). Data were analyzed using FlowJo software (FlowJo, RRID:SCR\_008520). Without I-SceI expression, the number of GFP positive cells was  $\leq 0.01\%$ .

### **U2OS cell culture, HR analysis, and clonogenic survival**

*RAD51C* mutant U2OS cells with an integrated SCR reporter (5) were cultured at 5% CO<sub>2</sub> in DMEM supplemented with 10% fetal bovine serum with 1% penicillin and streptomycin. For HR assays, 2 million cells were nucleofected with 1  $\mu$ g each plasmids expressing I-SceI (pCBASceI, Addgene plasmid # 26477, RRID:Addgene\_26477; (8)) and wild-type or variant *RAD51C* (pRP6, derived from pWZL-hygro; RRID:Addgene\_19834; (5)). *RAD51* focus formation was done blinded using cells stably expressing *RAD51C* variants from pWZL-*RAD51C* lentivirus, as described previously (5).

For clonogenic survival, *RAD51C* variants were expressed from pCMV-2B FLAG tagged plasmids that were stably integrated in cell pools selected in G418 for two weeks. Cells were seeded at 600 cells on 60mm in triplicate and treated 24 hours after plating with cisplatin or olaparib. For cisplatin, cells were exposed for 1 cell cycle as determined for each variant by doubling time calculations. For Olaparib, cells were exposed (Selleck Chem, AZD2281) continuously, replacing the media with fresh drug every 3 days. Cells were grown for 12-14 days, and fixed in 100% methanol. Plates were stained with crystal violet and scanned on a FluorChem M (proteinsimple).

### **U2OS Western blotting**

XRCC3 was cloned (EcoR1/Sal1) into pCMV3B (MYC) and *RAD51C* was cloned (EcoR1/Sal1) into pCMV2B (FLAG). For Western blotting, pCMV3B-XRCC3 was co-transfected with pCMV2B-*RAD51C* variants or pCMV2B empty vector. Cells were harvested 24 hours later (~80% confluence) and lysed in NP-40 lysis buffer (50 mM Tris base, 100 mM NaCl, 2 mM MgCl<sub>2</sub>, 10% glycerol, 0.1% NP-40) supplemented with 2 mM PMSF, protease inhibitor cocktail (A32965, Pierce), and phosphatase inhibitor cocktail (A32957, Pierce). Lysed cells were treated with Benzonase (Millipore Sigma, 70746) on ice for 20 min to eliminate DNA-mediated protein-protein interactions. Lysates were cleared by centrifugation and 10% volume was loaded on a 10% SDS-PAGE gel run at 80 V. Protein was then transferred onto PVDF membrane (Immobilon-FL, Millipore) at 100 V for 2 hours and blocked for 1 hour with Odyssey blocking buffer (Licor, 927-50000). Antibodies were diluted into Odyssey blocking buffer and Tris phosphate buffer (TBS) at a 1:1 ratio supplemented with 0.2% Tween-20. Antibodies included FLAG-M2 (Sigma, F3165; 1:2000) and GAPDH (Santa Cruz Biotechnology Cat# sc-25778, RRID:AB\_10167668; 1:500). Secondary antibodies were all used at 1:20,000 and included Goat anti-Mouse IgG Light-Chain Specific for *RAD51C* (AlexaFluor 790-conjugated; Jackson ImmunoResearch Labs Cat# 115-655-174, RRID:AB\_2338946) and IRDye680RD Goat anti-mouse (LI-COR Biosciences Cat# 926-68070, RRID:AB\_10956588) for GAPDH. Membranes were then imaged using the LI-COR Odyssey CLx imaging system.

## **Yeast-two- and three-hybrids: plasmid construction and screening**

Yeast-two-hybrid (Y2H) plasmids were created in pGAD-C1 and pGBD-C1 (RRID:Addgene\_26735) for *RAD51B* (EcoRI/BglIII), *RAD51D* (EcoRI/Sall), and *XRCC3* (EcoI/Sall). The constitutively expressed yeast-three-hybrid (Y3H) plasmid was created in pRS-ADH-416 for *RAD51B* (EcoRI/Sall). *RAD51C* mutant vectors were made by sub-cloning *RAD51C* into the pGAD-C1 or pGBD-C1 vectors using 5'EcoRI and 3'Sall restriction sites. Specific point mutations were introduced by site-directed mutagenesis of the pGAD-*RAD51C* or pGBD-*RAD51C* vectors. *RAD51C* cDNA and *RAD51B* cDNA were a gift from Jun Huang, *RAD51D* cDNA was a gift from Paul Russell, and pGAD-*XRCC3* and pGBT-*XRCC3* plasmids were a gift from David Schild.

Y2Hs and Y3Hs were performed as described in (9) except that the pGAD, pGBD, and pRS-ADH-416 plasmids were co-transformed into the YPJ69-4a yeast strain. *RAD51C* variants were queried in both the pGAD and pGBD vectors for interaction with each binding partner by plating on synthetic complete medium (SC) without leucine, tryptophan, and histidine (SC-LEU-TRP-HIS), where growth is indicative of a Y2H interaction, SC without leucine, tryptophan, uracil, and histidine (SC-LEU-TRP-URA-HIS), where growth is indicative of a Y3H interaction, and loading controls SC without leucine and tryptophan (SC-LEU-TRP) for the Y2H or SC without leucine, tryptophan, and uracil (SC-LEU-TRP-URA) for the Y3H, respectively. Images were identically adjusted for brightness and contrast in Adobe Photoshop (Adobe Photoshop, RRID:SCR\_014199). Analysis was performed in duplicate or triplicate with fresh transformations for each biological replicate. Relative interaction of each *RAD51C* variant was quantified in ImageJ (ImageJ, RRID:SCR\_003070) and normalized to wild-type *RAD51C* interactions (which was set to 100%) per plate. The corresponding empty vector was subtracted to adjust for background growth.

Correlations between HR, Y2H, and Y3H results were plotted in GraphPad Prism (GraphPad Prism, RRID:SCR\_002798) relative to wild-type phenotypes with linear regressions (black) and 95% confidence intervals (green area). Pearson correlation statistical tests were used to calculate *r* values and were annotated on each graph.

## **Yeast-2-hybrid Western blots**

Yeast expressing *RAD51C* wild-type or the mutant *RAD51C* expressed in the pGAD-C1 (AD expression vector) and *XRCC3* expressed in the pGBD-C1 (BD expression vector) was grown over night in YPD medium. Protein was lysed using TCA precipitation as described (10) and 0.75 OD<sub>600</sub> of total protein was analyzed by 10% SDS-PAGE gel. *RAD51C* protein and the loading control *Kar2* was detected on a LiCor CLX scanner. *RAD51C* and *XRCC3* expression was detected using *RAD51C* antibody (Abcam Cat# ab55728, RRID:AB\_945135, 1:500), *XRCC3* antibody (Novus Cat# NB100-180B, RRID:AB\_1849481, 1:2000), and *Kar2* Santa Cruz antibody (sc-33630, 1:2000) and LI-COR IRDye secondary antibodies (goat anti-mouse LI-COR Biosciences Cat# 926-68070, RRID:AB\_10856588 for *XRCC3* at 1:20,000; donkey anti-mouse (LI-COR Biosciences Cat# 926-68072, RRID:AB\_10953628 at 1:20,000 for *RAD51C*; and goat anti-rabbit LI-COR Biosciences Cat# 926-32211, RRID:AB\_621843 at 1:20,000 for *Kar2*).

### **Purification of BCDX2 and CX3 complexes**

Hi5 insect cells were infected for 48 hours with baculoviruses expressing BCDX2 (RAD51B-His and XRCC2-Flag) and CX3 (MBP-RAD51C and XRCC3-Flag) complexes with WT RAD51C or the indicated RAD51C mutant. All the purification steps were carried out at 0-4°C.

For BCDX2 purification, crude cell lysate was prepared from 6-8 g cell pellet (from 800 ml insect cell culture) by sonication in 50 ml T buffer (25 mM Tris-HCl, pH 7.5, 10% glycerol, 0.5 mM EDTA, 1 mM DTT, 0.05% IGEPAL, 20 mM imidazole, 1 mM PMSF and protease inhibitors) containing 300 mM KCl, 5 mM ATP, and 2 mM MgCl<sub>2</sub>, followed by centrifugation at 100,000 Xg for 60 min. The clarified lysate was incubated with 2.5 ml Ni-NTA resin (Qiagen, 1018142) for 1 hour, followed by sequential washes of the resin with 25 ml T buffer with 300 mM KCl, 500 ml T buffer with 1000 mM KCl and 25 ml T buffer with 100 mM KCl and with all the buffer also containing 2 mM each of ATP and MgCl<sub>2</sub>. The BCDX2 complex was eluted from the affinity matrix with 10 ml T buffer containing 200 mM imidazole and 2 mM each of ATP and MgCl<sub>2</sub>. Further purification was by ion exchange in a 1 ml HiTrap Q HP column fractionated with a 30 ml 150-450 mM KCl gradient in T buffer. Peak fractions were pooled and concentrated to 0.4 ml in a Amicon 30 concentrator and then subject to size exclusion chromatography in a Superose 6 Increase 10/300 GL column in T buffer with 300 mM KCl and 2 mM each of ATP and MgCl<sub>2</sub>.

Lysates containing CX3 complexes were prepared and clarified as described above. The clarified lysate was incubated with 2 ml amylose resin (NEB, E8021) for 2 h, followed by sequential washes of the resin with 25 ml T buffer with 300 mM KCl, 200 ml T buffer with 1000 mM KCl and 25 ml T buffer with 300 mM KCl and with all the buffers also containing 2 mM each of ATP and MgCl<sub>2</sub>. CX3 complex was eluted from the affinity matrix with 10 ml T buffer containing 20 mM maltose and 2 mM each of ATP and MgCl<sub>2</sub>. For further purification, the eluate from the amylose affinity step was incubated with 1 ml anti-FLAG M2 resin (Sigma, A2220) for 2 h, followed by washing with 50 ml T buffer containing 300 mM KCl and 2 mM each of ATP and MgCl<sub>2</sub> before protein elution with the same buffer containing 200 ng/μl FLAG peptide (Sigma, F3290). The eluate was concentrated to 0.4 ml and then fractionated by size exclusion in a Superdex 200 10/300 column in same buffer without the FLAG peptide. For cleaving the MBP tag, following the affinity purification step in the anti-FLAG resin, CX3 complexes were concentrated to 0.4 ml and incubated overnight with 100 μg of TEV protease. The CX3 complexes were separated from the cleaved MBP tag and TEV protease by fractionation on a Superdex 200 10/300 column as above.

### **DNA binding and ATPase assays**

For DNA binding, 1 nM of 5' <sup>32</sup>P-labeled 80-nt ssDNA (11) was incubated with the indicated concentration of purified BCDX2 complex in 10 μl reaction buffer (50 mM Tris-HCl, pH 7.5, 155 mM KCl, 1 mM DTT, 1 mM ATP, 1 mM MgCl<sub>2</sub> and 100 μg BSA) for 10 min at 37°C. Nucleoprotein complexes were resolved on 5% polyacrylamide gels in Tris-borate buffer. Gels were dried and subjected to phosphorimaging analysis. BCDX2 complexes (2.0 μM) were incubated in the absence or presence of ssDNA (20 μM nucleotides, phiX174 virion) in 10 μl of reaction buffer (20 mM HEPES at pH 7.5, 1 mM DTT, 1 mM MgCl<sub>2</sub>) containing 0.05 mM [γ-<sup>32</sup>P] ATP at 37°C. Aliquots of 2 μl were withdrawn at the indicated times and mixed with 2 μl of 0.5 M

EDTA to stop the reaction. The level of ATP hydrolysis was determined by layer chromatography on PEI cellulose F sheets (Millipore, 105579) in 0.375 M potassium phosphate (pH 3.5).

### **Structural modeling of the BCDX2 and CX3 complexes**

RAD51B, RAD51C, RAD51D, XRCC2 and XRCC3 sequences from UniProt database (RRID:SCR\_004426 (12)) were used as input in the mmseqs2 homology search program (13) and a multiple sequence alignment (MSA) was generated against the UniRef30 clustered database (14). Only orthologs from the MSA of each paralog were selected. For this, homologs of RAD51B and RAD51C sharing less than 35% sequence identity with their respective query and those of XRCC2 and XRCC3 sharing less than 30% were discarded. Homologs with less than 50% of coverage of the aligned region of their query were also discarded. Next, all species having at least one homolog in the MSAs for every RAD51 paralog were selected; only the homolog with highest sequence identity to the query was kept. Full-length sequences of the orthologs were retrieved and re-aligned with mafft (15). MSAs of RAD51B, RAD51C, RAD51D, XRCC2 and MSAs of RAD51C, XRCC3 were concatenated matching the sequences of the same species resulting into two paired MSAs for the BCDX2 and CX3 complexes, respectively. Final concatenated MSAs contained 1368 and 722 positions and 384 and 714 sequences for BCDX2 and CX3, respectively. Both paired MSAs were used as inputs to generate 5 structural models for each of the BCDX2 and CX3 complexes, respectively, using a local version of the ColabFold interface (14) running 3 iterations of the AlphaFold2 algorithm v2.1.0 (16) trained on the multimer dataset (17) on a local HPC equipped with NVIDIA Ampere A100 80Go GPU cards. The five models for each complex converged toward very similar conformations and obtained high confidence and quality scores with pLDDTs in the range [79.1, 85] and [84.5, 88.1] and pTMscore in the range [0.75, 0.801] and [0.825, 0.846] for BCDX2 and CX3 complexes, respectively. The models with highest pTMscores for BCDX2 and CX3 models were relaxed using rosetta relax protocols to remove steric clashes (18) with strong backbone constraints (std dev. of 0.5 Å for the atomic positions) and were used for structural analysis. The solvent accessibility of every mutated residue was computed with Naccess (19). The nucleotides and ssDNA that are shown bound to the structural models of RAD51 paralogs in **Fig. 5** were deduced from the superimposition of these subunits with those of RAD51 in the PDB structure 5H1B. The models are available in ModelArchive (modelarchive.org) with the accession codes ma-a54ps (BCDX2) and ma-52hi1 (CX3).

Supplementary Figure 1

A.

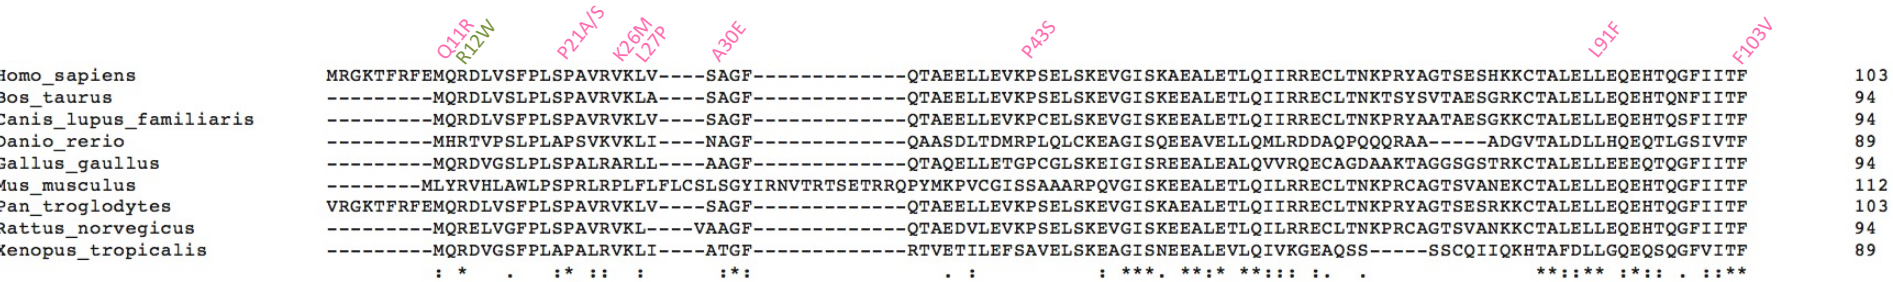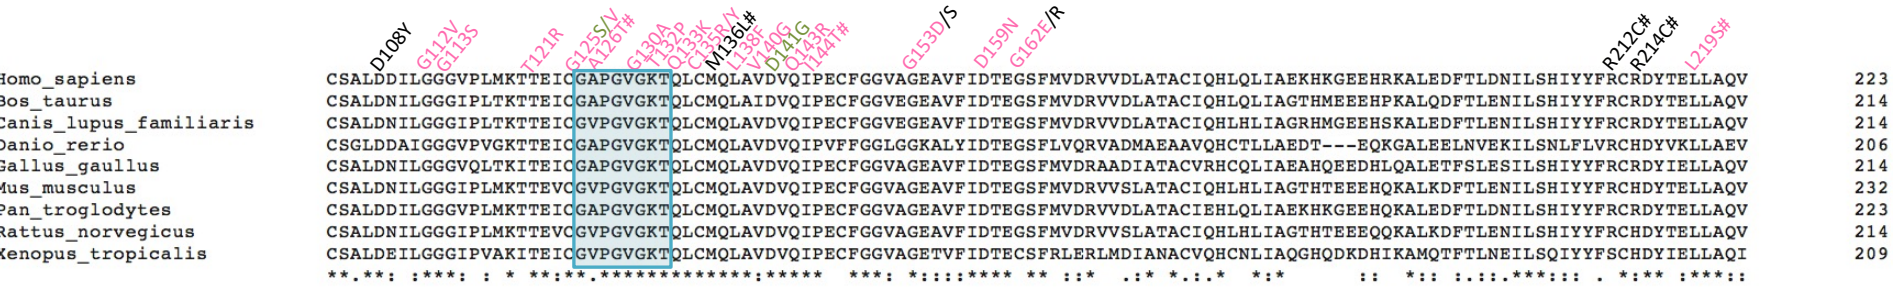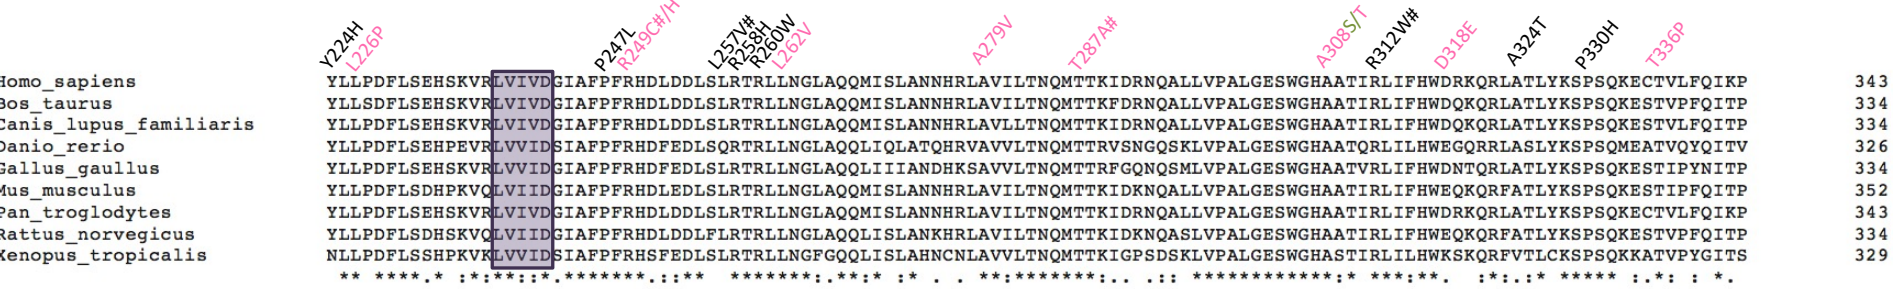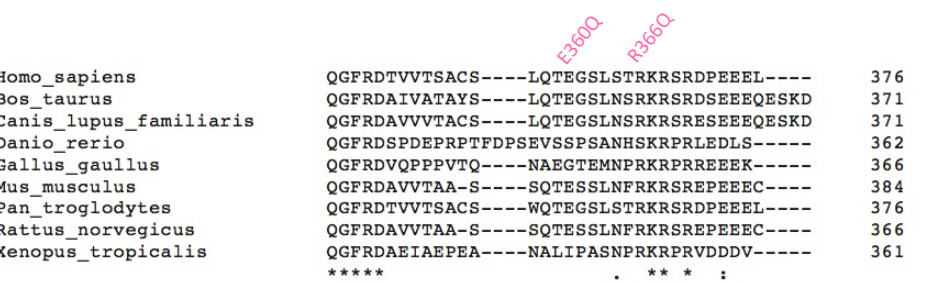

Clustal alignment:  
 \* fully conserved  
 : strongly similar  
 . weakly similar

Walker A motif (aa 125-132)  
 Walker B motif (aa 238-242)

RAD51C variant code:  
 Pink - BC/OC  
 Black - other cancer  
 Green - Population variant  
 \* Cancer mutation also identified as a population variant

B.

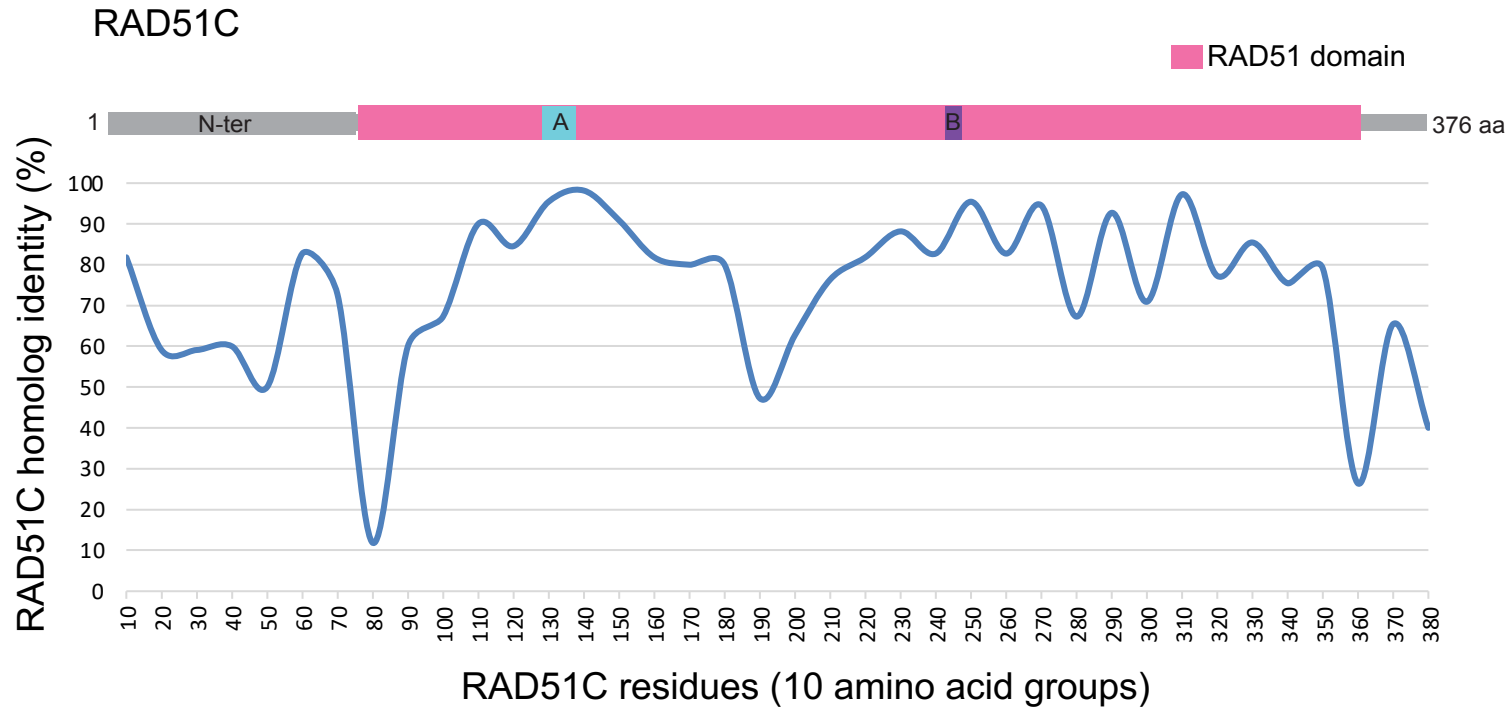

### **Supplementary Figure S1. RAD51C conservation among vertebrate species.**

**A.** Clustal Omega was used to generate a multiple sequence alignment of RAD51C homologs from nine vertebrate species. Conserved residues are indicated with (\*) for an invariant residue, (:) for strongly similar properties (roughly equivalent to scoring  $>0.5$  in the Gonnet PAM 250 matrix: STA, NEQK, NHQK, NDEQ, QHRK, MILV, MILF, HY, FYW), or a (.) for weakly similar properties (roughly equivalent to scoring  $\leq 0.5$  and  $>0$  in the Gonnet PAM 250 matrix: CSA, ATV, SAG, STNK, STPA, SGND, SNDEQK, NDEQHK, NEQHRK, FVLIM, HFY). RAD51C cancer (pink, BC/OC; black, other cancer) and population (green) variants are indicated. An asterisk indicates that the variant is found as both a cancer and population variant. Walker A and B motifs are indicated by blue and purple boxes, respectively.

**B.** RAD51C homolog identity. The region around the Walker A box shows the highest level of identity although other well conserved regions are also observed. Jalview software was used to generate the identity in 10 amino acid bins, starting at amino acid 10 of human RAD51C since some of the homologs do not contain the first 9 residues.



Supplementary Figure S2

A

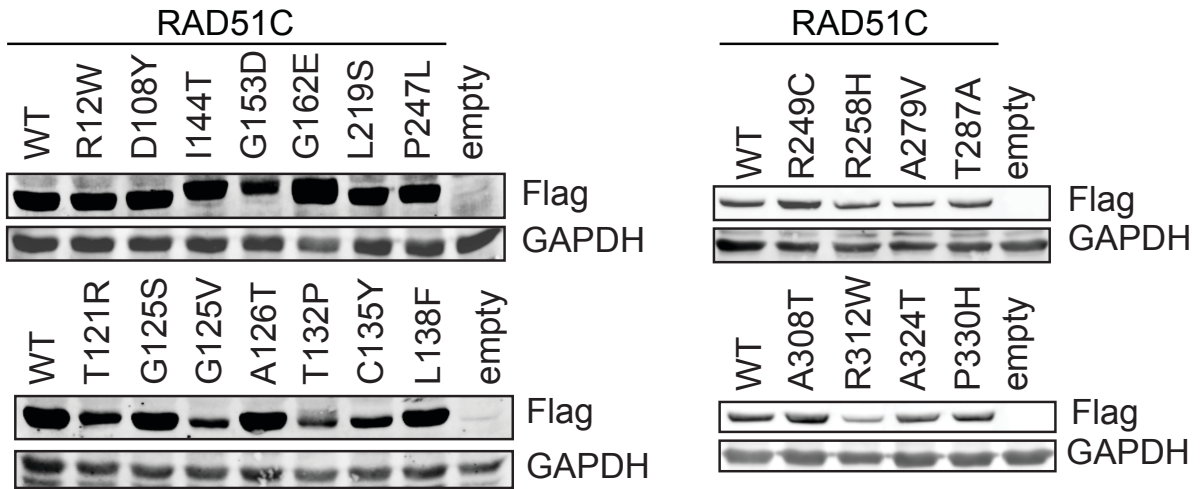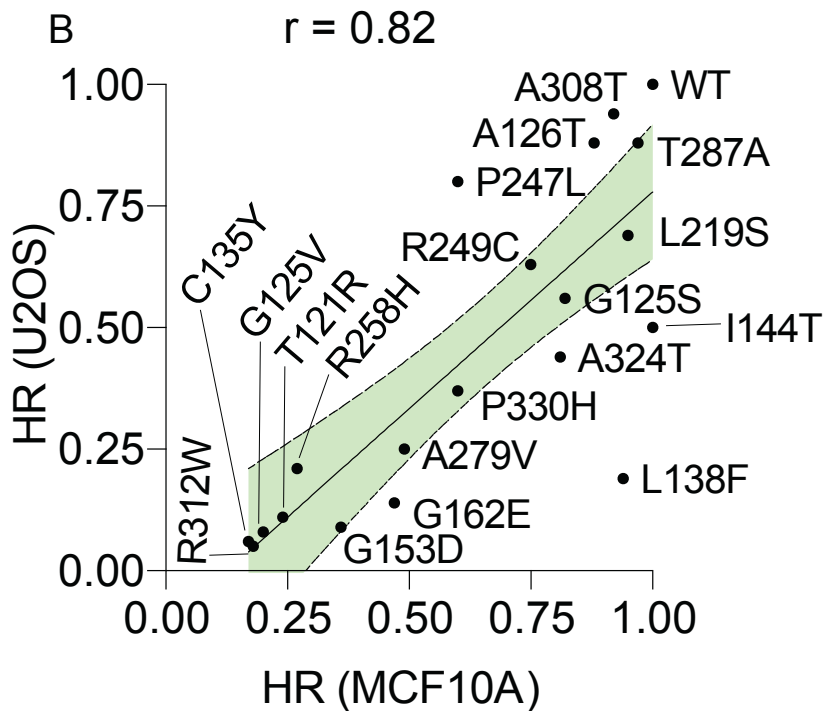

C

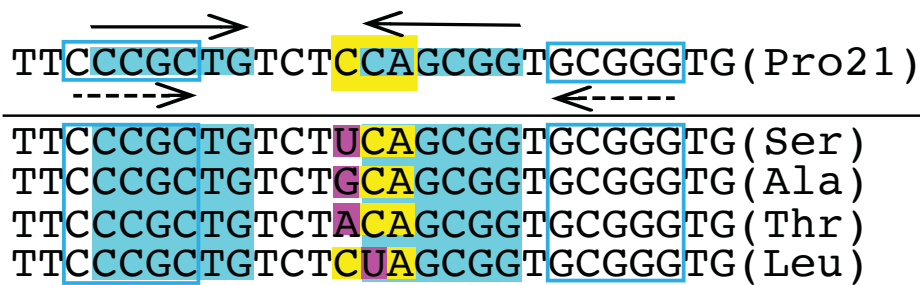



**Supplementary Figure S2. Prediction algorithms have limited success for RAD51C HR function.**

**A.** Western blotting for Flag-tagged RAD51C variants expressed in U2OS cells. A subset of variants with defective HR was chosen for analysis

**B.** Correlation of RAD51C variants for HR proficiency in MCF10A and U2OS cells. In both cell lines, HR levels are relative to that obtained with wild-type RAD51C. The linear regression is plotted in black with 90% confidence intervals shaded in green.

**C.** Four different variants are reported at RAD51C P21 in ClinVar, three of which have also been reported multiple times in cancers, including several breast cancers, such that P21 is considered a cancer hotspot. The CCA codon for P21 (yellow shading) is within a 6 bp GC rich inverted repeat (blue shading) and in between a 5 bp GC rich inverted repeat (blue outline), which could potentially make the sequence unstable, e.g., during DNA replication. The bp altered in the variant is highlighted (purple).

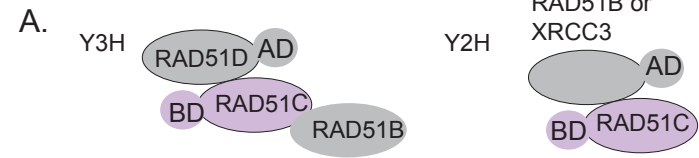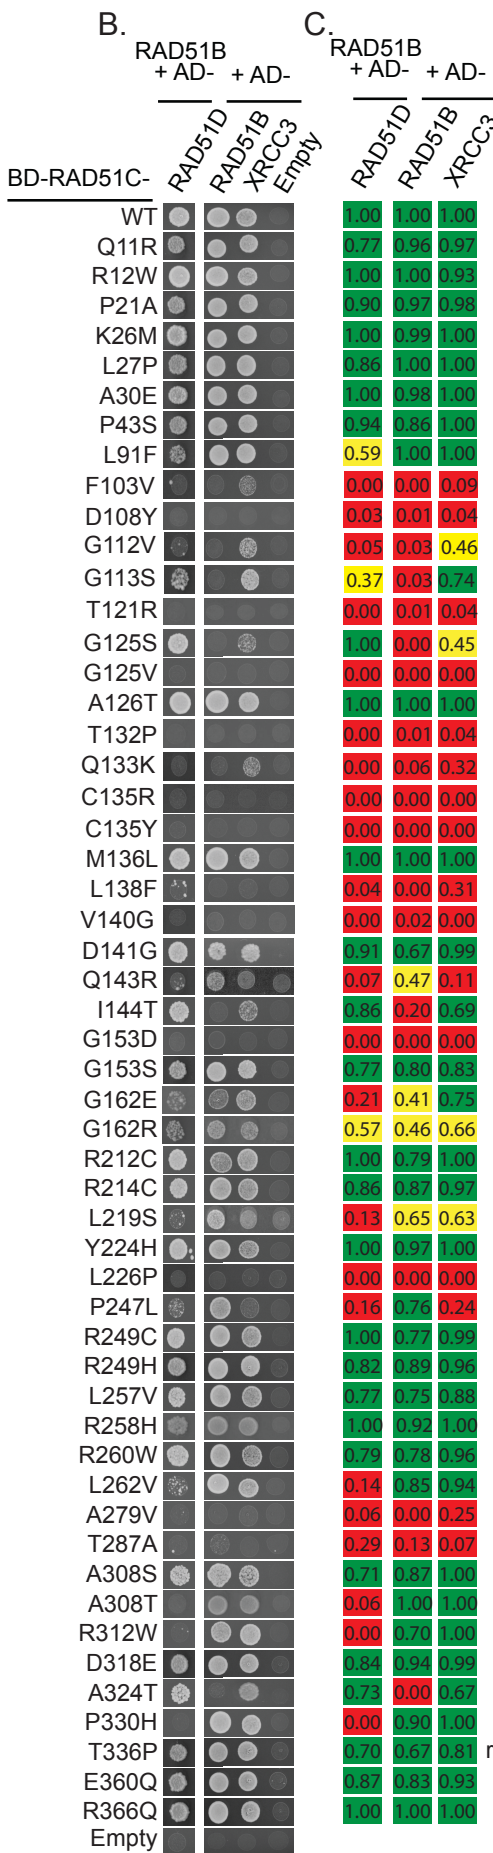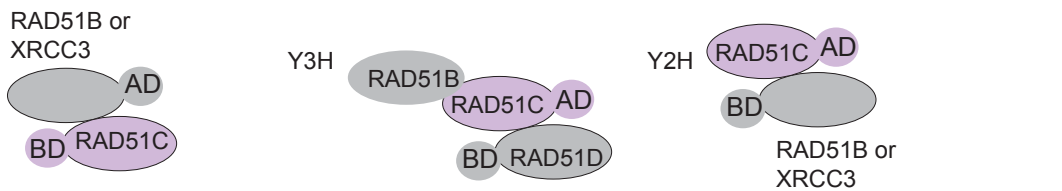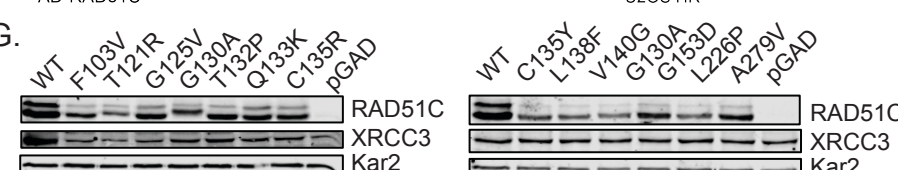

Figure 2

**Supplementary Figure S3. RAD51C variant interactions with other RAD51 paralogs in Y2H/Y3H screens.**

**A.** A yeast-two-hybrid (Y2H) approach was used to test interactions with RAD51B and XRCC3 and a yeast-three-hybrid (Y3H) approach was used for RAD51D, since RAD51C interaction is more robust in the presence of its binding partner RAD51B (20, 21). RAD51C variants were tested as both activating domain (AD) fusions (see **Fig. 2B**) and DNA binding domain (BD) fusions.

**B.** Representative Y2 and Y3H interactions of RAD51C variant BD fusions. Interaction is indicated by growth. Note: RAD51C P21S, G130A and D159N were not tested in the BD direction.

**C.** Heat map indicates averaged protein-protein interactions for the set of RAD51C mutants as determined by amount of growth in the Y2H/Y3H assays. RAD51C variant interaction with the indicated RAD51 paralog is relative to WT (green: 0.67-1.00, yellow: 0.34-0.66, red: 0-0.33). Growth was quantified using ImageJ from two or more independent experiments. The negative control was included on every plate (empty GAL4 BD plasmid).

**D-F.** Y2H/Y3H interactions for the RAD51C variants correlate in the AD versus BD directions for each of RAD51D (**D**), RAD51B (**E**), and XRCC3 (**F**) ( $p < 0.001$  for each). Linear regression lines are shown in black with 90% confidence intervals shaded in green. Note that interaction results from the AD direction for T287A and D108Y correlate with HR (proficient in all directions; **Fig. 2C**), while the BD direction shows defective interactions with all paralogs.

**G.** RAD51C variant expression in yeast. RAD51C variants were selected for Western blotting based on deficient interactions in Y2H/Y3H.

**H-J.** HR levels for the RAD51C variants correlate well with Y2H/Y3H interactions in the BD directions for each of RAD51D (**H**), RAD51B (**I**), and XRCC3 (**J**), with RAD51D interaction being the best predictor.

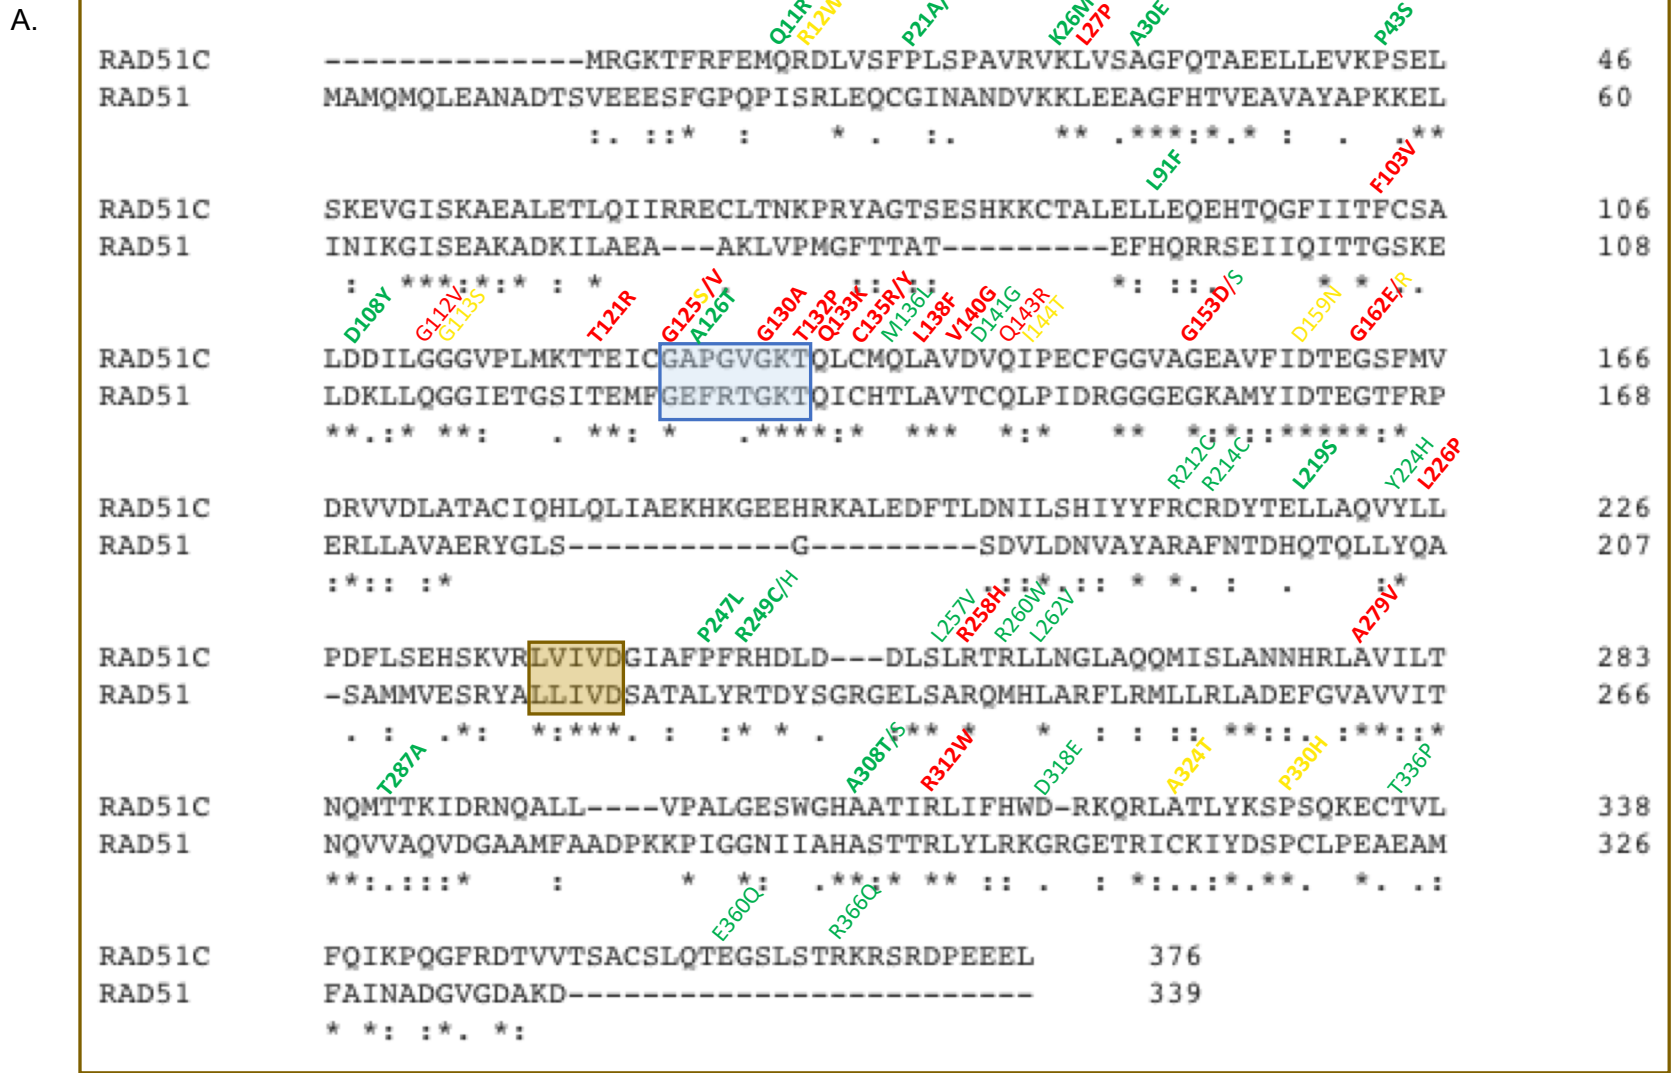

Conserved residues (\*.): 27  
 proficient 8 (30%)  
 reduced 4 (15%)  
 deficient 15 (55%)

Non conserved (..): 22  
 proficient 17 (77%)  
 reduced 2 (9%)  
 deficient 3 (14%)

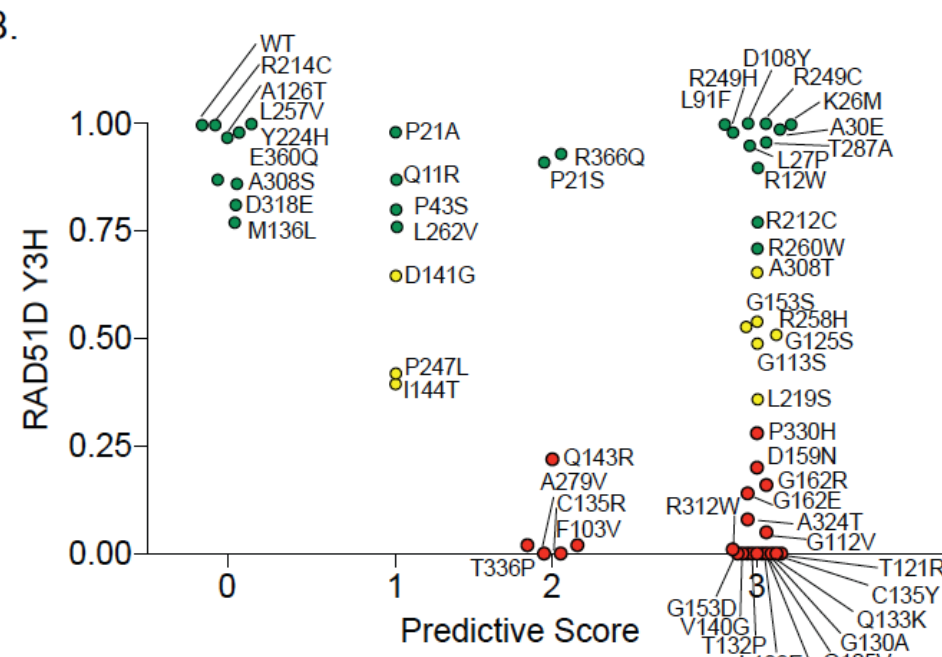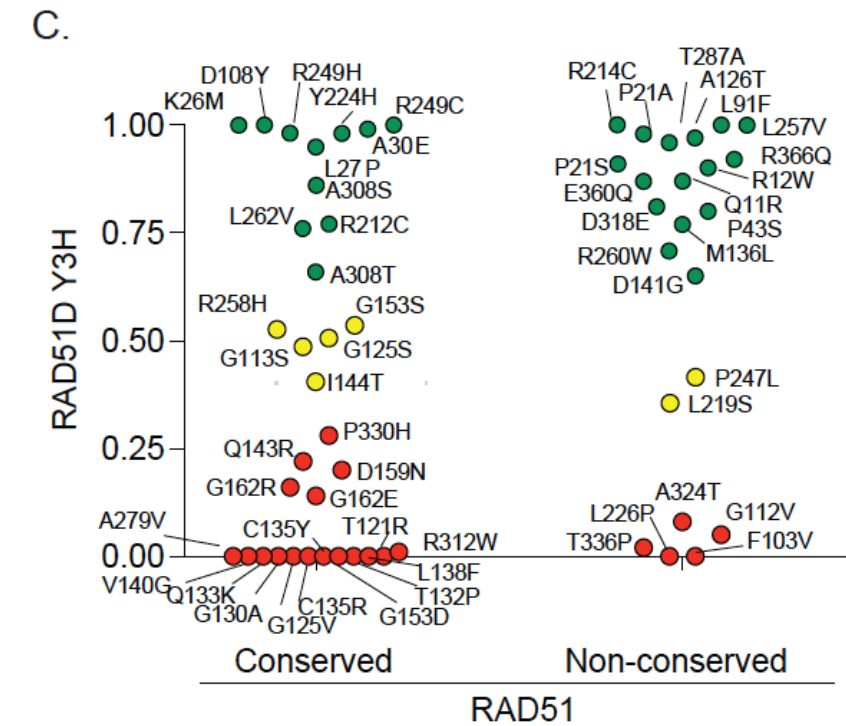

RAD51

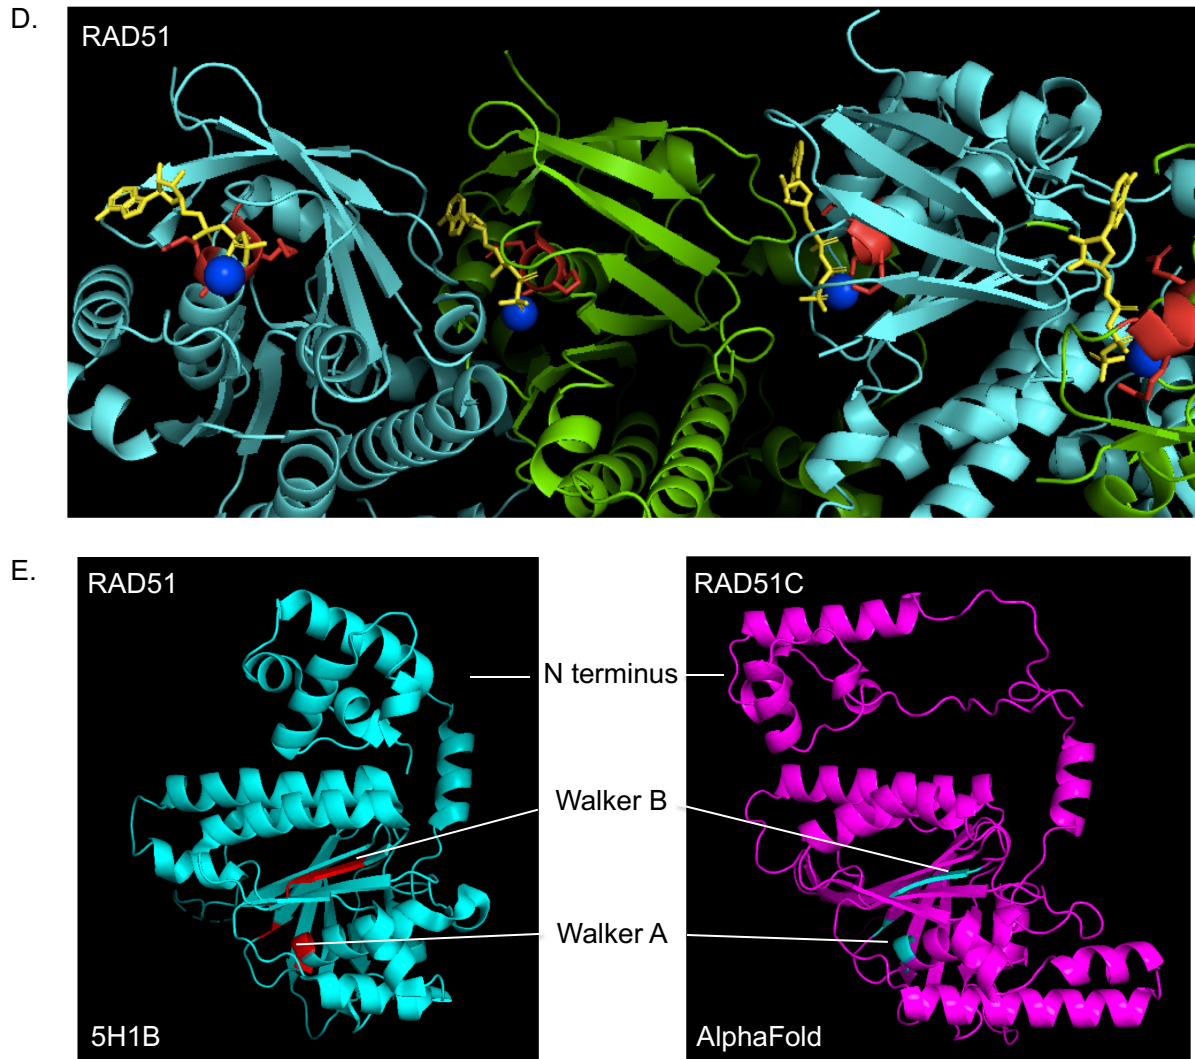

**Supplementary Figure S4. RAD51C has limited sequence identity with RAD51 but is predicted to be structurally well conserved.**

**A.** RAD51C variants at conserved residues with RAD51 are much more likely to be critical for HR rather than nonconserved residues. The alignment (Clustal Omega) shows that the two proteins have only 28% protein sequence identity. RAD51C variants above the alignment are colored in bold according to their HR activity in U2OS cells (deficient HR, red; reduced HR, yellow; proficient HR, green); those not tested for HR are in regular type and are colored according to the Y2H/Y3H results. (See also lollipop diagram in **Fig. 4A**.) The Walker A and B boxes are shaded blue and purple, respectively.

**B.** Comparison of RAD51D interaction of the RAD51C variants by Y3H with the combined scores from the PolyPhen-2, SIFT, and PROVEAN prediction tools, as in **Fig. 3B**. The variants are colored according to whether RAD51D interaction is proficient (green), reduced (yellow), or deficient (red).

**C.** Comparison of RAD51C variant interaction with RAD51D with residue conservation with RAD51, as in **Fig. 3B**.

**D.** RAD51 filament structure demonstrating ATP near the interface of adjacent RAD51 monomers. Alternating monomers are in cyan and green, conserved Walker A motif residues in red, ATP in yellow, with the bound Mg<sup>2+</sup> ion in blue. PDB: 5NWL (22).

**E.** RAD51 and RAD51C are predicted to have similar structures. The Walker A and B motif residues, red in RAD51 and cyan in RAD51C, are similarly situated within the main globular fold. The RAD51 structure is from PDB: 5H1B (23), and the RAD51C structure prediction is from the AlphaFold Protein Structure Database ([alphafold.ebi.ac.uk](http://alphafold.ebi.ac.uk)) (16). The N termini of the two proteins have structural similarity but are differently oriented; however, the linker between the two domains in RAD51C has a low confidence score in the structure prediction.



# Supplementary Figure S5

A.

B.

BCDX2 complex purification scheme:  
 (RAD51B-His  
 RAD51C  
 RAD51D  
 XRCC2-Flag)  
 Nickle affinity  
 ↓  
 HiTrap Q HP  
 ↓  
 Superose 6

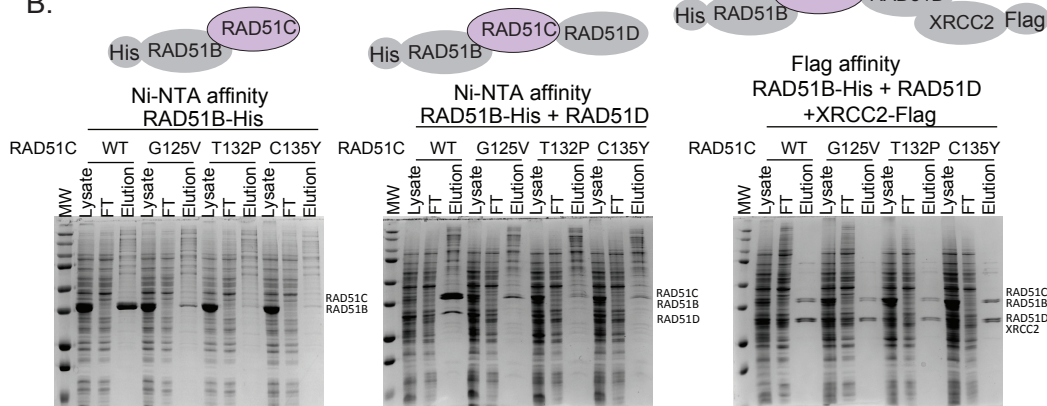

C.

Purification of BCDX2 without ATP and MgCl<sub>2</sub>

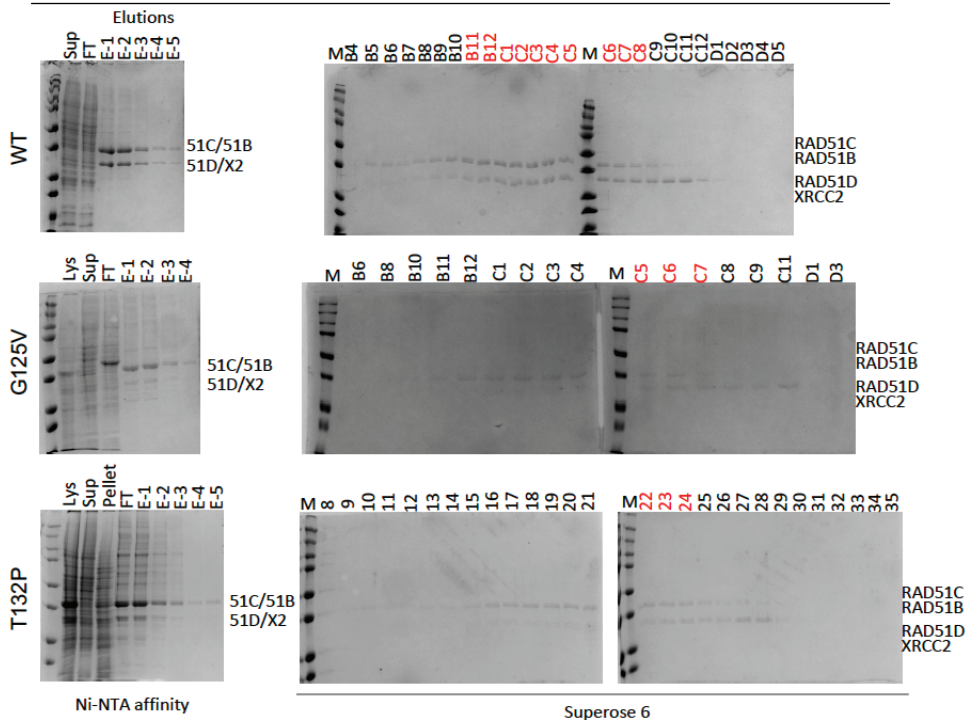

F.

| RAD51C | Time | No DNA     | With DNA   |
|--------|------|------------|------------|
| WT     | 60'  | 0.08503541 | 0.1320713  |
| G125V  | 60'  | 0.022151   | 0.0241905  |
| G130A  | 60'  | 0.07678847 | 0.09546789 |
| T132P  | 60'  | 0.01940862 | 0.01717652 |
| Q133K  | 60'  | 0.03139336 | 0.03424465 |
| C135Y  | 60'  | 0.03563348 | 0.07237941 |

ATPase without DNA

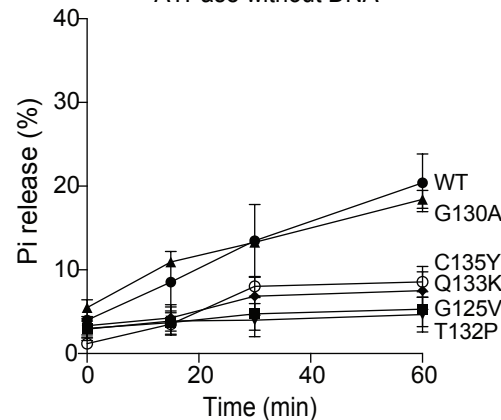

D.

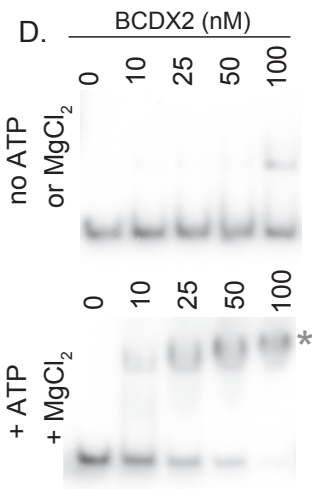

E.

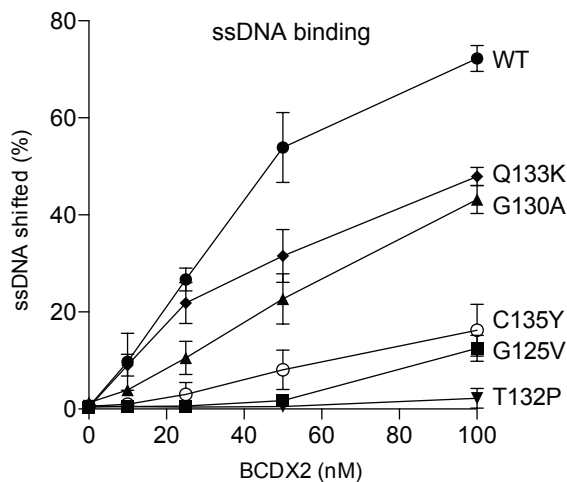

G.

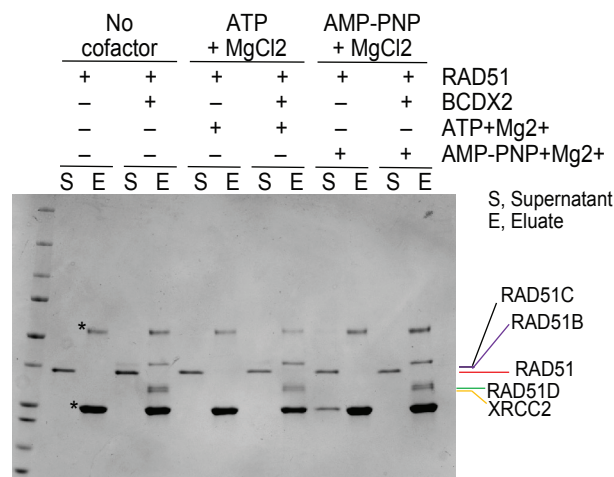

H.

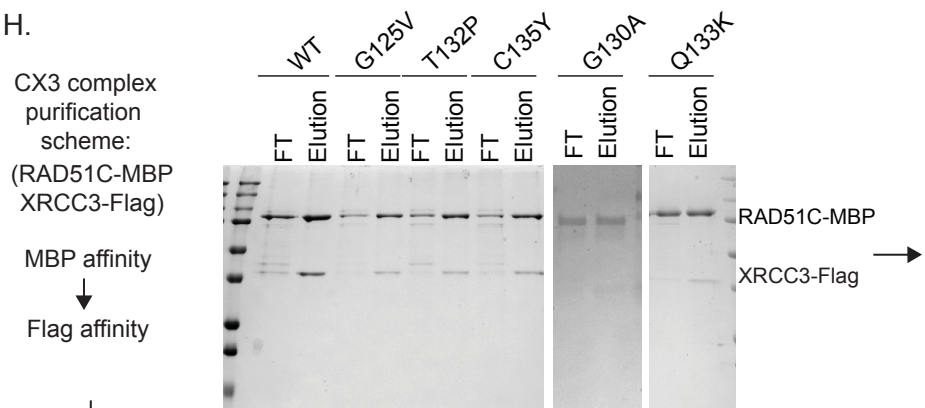

I.

TEV digestion

WT T132P

- + - + TEV

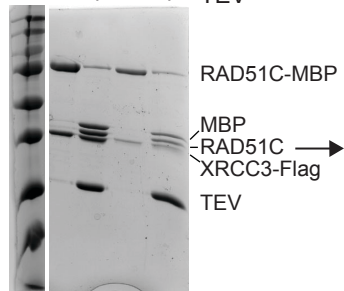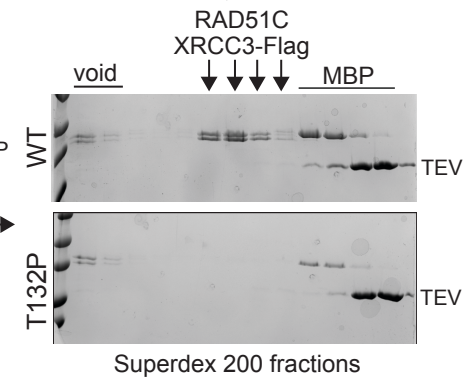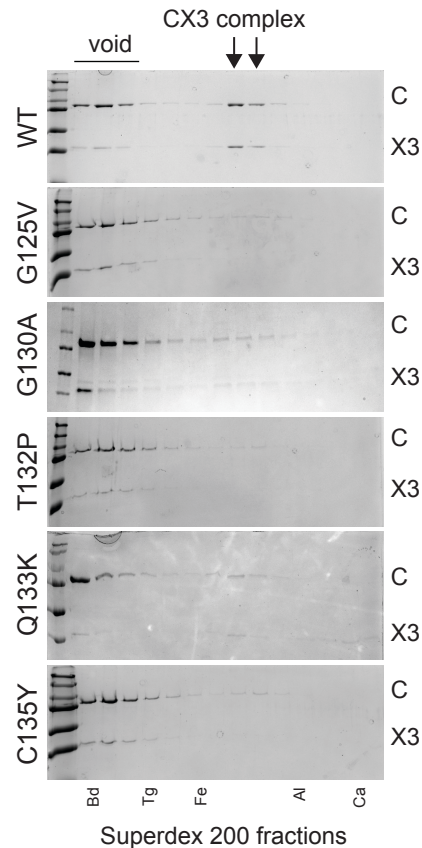



**Supplementary Figure S5. Biochemical analysis of the RAD51C variants in the BCDX2 and CX3 complexes.**

**A.** Purification scheme for BCDX2 complexes in the presence of ATP and MgCl<sub>2</sub>. A three-step approach was used to purify BCDX2 complexes from insect cell extracts. The last step of the purification, fractionation on a Superose 6 column, is shown in **Fig. 4B**.

**B.** Wild-type RAD51C forms subcomplexes with RAD51B (BC, left) and RAD51B+RAD51D (BCD, middle), but the three RAD51C mutants are poor at subcomplex formation. However, they do form a complex when a fourth RAD51 paralog, XRCC2, is added (BCDX2, right). Experiments performed in the presence of ATP and MgCl<sub>2</sub>

**C.** BCDX2 purified in the absence of ATP and MgCl<sub>2</sub> was less stable and frequently dissociated. Dissociation was more pronounced with the BC<sub>mut</sub>DX2 complexes. Fractions containing all four paralogs are indicated in red.

**D.** ssDNA binding. ssDNA binding by the BCDX2 complex was assessed in the absence or presence of ATP and MgCl<sub>2</sub> by electrophoretic mobility shift assays using an 80mer substrate. DNA binding with ATP and MgCl<sub>2</sub> is indicated with an asterisk.

**E.** The graph shows ssDNA binding by the BCDX2 complexes as assessed by electrophoretic mobility shift assays in the presence of ATP and MgCl<sub>2</sub> using an 80mer substrate from three independent experiments.

**F.** ATP hydrolysis was assessed by incubating BCDX2 complexes with ATP over time by thin layer chromatography, as shown in **Fig. 4D**. The table provides values calculated as pmole ATP hydrolysed pmole<sup>-1</sup> BCDX2 min<sup>-1</sup> with and without ssDNA. The graph shows results from three independent experiments performed in the absence of ssDNA.

**G.** The BCDX2 complex did not bind RAD51 either in the presence of ATP and MgCl<sub>2</sub> or in the presence of the nonhydrolyzable AMP-PNP and MgCl<sub>2</sub>. Asterisks indicate heavy and light chains.

**H.** Wild-type RAD51C was able to form a stable complex with XRCC3 (CX3) while RAD51C mutants were not. CX3 complexes were affinity purified with the Flag (XRCC3-Flag) and MBP (RAD51C-MBP) tags in the presence of ATP and MgCl<sub>2</sub>. C<sub>mut</sub>X3 complexes eluted from the Flag beads nearly as efficiently as the C<sub>WT</sub>X3 complex. However, when fractionated on a Superdex 200 column, they no longer formed a stable complex and were instead primarily in the void volume as protein aggregates. Protein markers: Bd, BlueDextran; Tg, thyroglobulin; Fe, ferritin; Al, aldolase; Ov, ovalbumin.

**I.** To determine whether the MBP tag interfered with CX3 stability, another CX3 purification scheme was devised in which the MBP tag was cleaved from RAD51C using TEV protease after the Flag affinity step (left gel). C<sub>WT</sub>X3 and C<sub>T132P</sub>X3 complexes were then loaded onto a Superdex 200 column (right gel). While the wild-type RAD51C elutes primarily in a complex with XRCC3-Flag, the T132P mutant elutes primarily in the void volume, as does XRCC3-Flag, suggesting aggregate formation.

Supplementary Figure S6

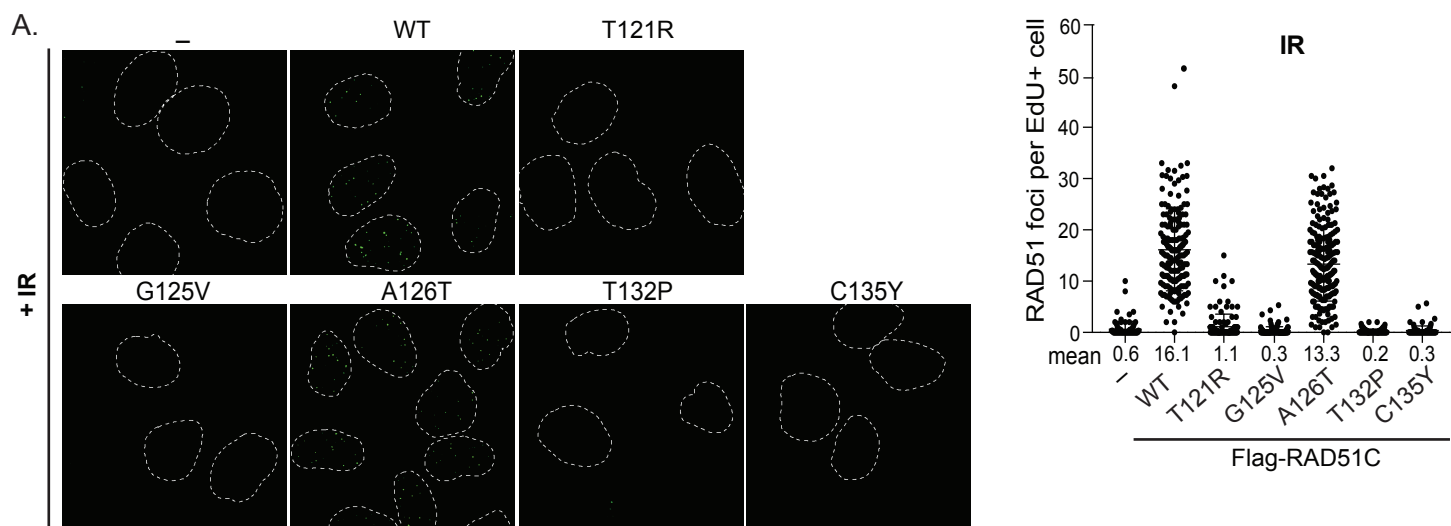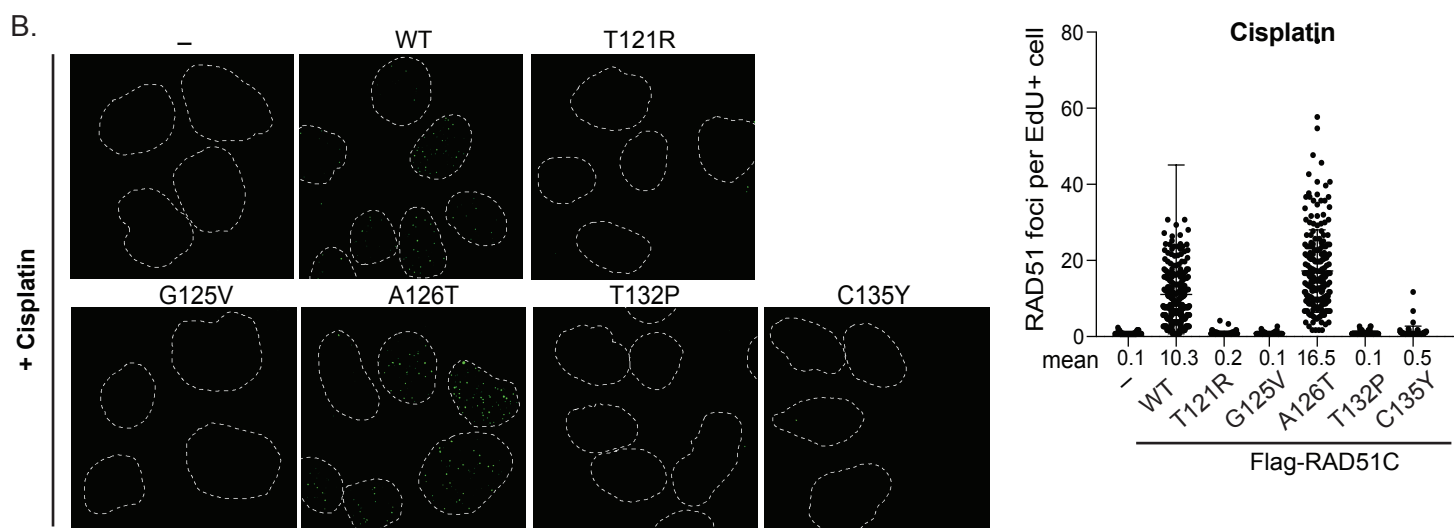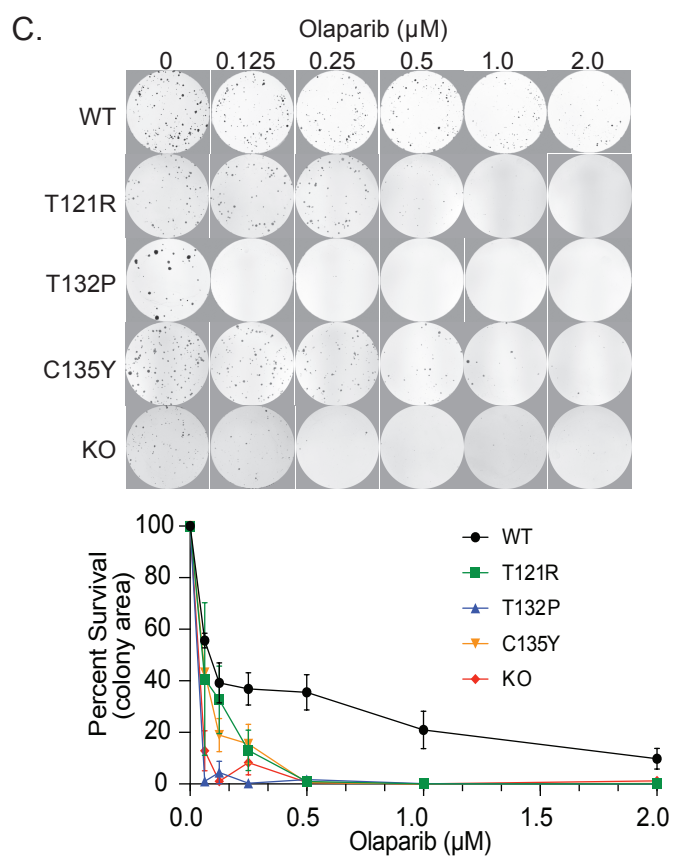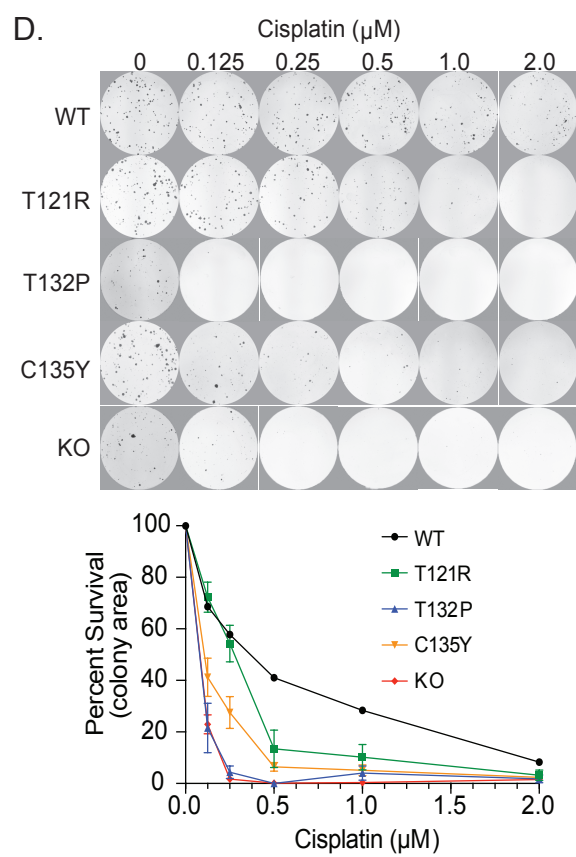

**Supplementary Figure S6. RAD51C variants in the Walker A region exhibit defects in RAD51 focus formation and are sensitive to cisplatin and olaparib.**

**A,B.** RAD51 focus formation is impaired in RAD51C mutant U2OS cells expressing HR-deficient variants treated with 4 Gy ionizing radiation with 4 hrs recovery (**A**) or 3.3  $\mu\text{m}$  cisplatin for 6 hrs with 4 hrs recovery (**B**). Only S phase cells that are EdU+ were analyzed.

**C,D.** HR-deficient variants have impaired clonogenic survival following treatment with olaparib (**C**) or cisplatin (**D**). Cells were exposed to olaparib continuously or cisplatin for one cell cycle at the concentrations indicated and then grown for 12 days before fixation. Experiments were performed in biological triplicate and representative plate images are shown.

Supplementary Figure S7

A.

|        |                                                                 |     |
|--------|-----------------------------------------------------------------|-----|
| RAD51  | MAMQMQLLEANADTSVEEESFGPQPI SRLEQCGI ----NANDVKKLEEAGFHTVEAVAYAP | 56  |
| RAD51B | -----MGSKK----LKRVLG----SQELCDRLSRHQILTCQDFLCLS                 | 34  |
| RAD51C | -----MRGKTRFRFEMQRDLVSFPL----SPAVRVKLVSAAGFQTAEEELLEVK          | 42  |
| RAD51D | -----MGVLRVGLCPGLTEEMIQLLRSHRIKTVVDLVSAD                        | 35  |
| XRCC2  | -----                                                           | 0   |
| XRCC3  | -----MDLDDL----NPRIIAAIKKAKLKSVEVLHFS                           | 31  |
|        |                                                                 |     |
| RAD51  | KKELINIKGISEAKADKILAEAAKLVPMGFTTATEFHQ---R-----RS---EIIQIT      | 103 |
| RAD51B | PLELMKVITGLSYRGVHELLCMVSRACA-PMQTAYGIKA---Q-----RSADFSPAFLS     | 84  |
| RAD51C | PSELSKEVGI SKAEALLETQII RRECL-TNKPRYAGTSESHKCTALELLEQEHTQGFII   | 101 |
| RAD51D | LEEVAQKCGLSYKALVALRRVLLAQFS-----AFPVNG-----ADLYEELKTSTAILS      | 83  |
| XRCC2  | -----MCS-----AFHRAE-----SGTELLARL                               | 18  |
| XRCC3  | GPLDKRLTNLSSPEVWHLLRTASLHLRGSSILTALQLHQOKER-----FPTQHQRLS       | 83  |
|        |                                                                 |     |
|        | E124/ Walker Q135/<br>E122 A Q133                               |     |
| RAD51  | TGSKELDKL-----LQGGIETGSIYEFGEFRTGKQIICHTLAVTCQLPIDRGGGEGKA      | 157 |
| RAD51B | TTLSALDEA-----LHGGVACGSLTITGPPGCGKQFCIMMSILATLPTNMGGLGAV        | 138 |
| RAD51C | TFCALDDI-----LGGGVPLMKTTEICGAPGVGKQLCMQLAVDVQIPECPGGVAGEA       | 155 |
| RAD51D | TGIGSLDKL-----LDAGLYTGEVTEIVGGPGSGKQVCLCMAANV-----AHGLQQNV      | 132 |
| XRCC2  | EGRSSLEIEPNLFADEDSFVHGDIIEFHGPEGTGKTEMLYHLTARCILPKSEGGLEVEV     | 78  |
| XRCC3  | LGCPVLDAL-----LRGGLPLDGIIELAGRSSAGKQLALQLCLAVQFPRQHGGEAGA       | 137 |
|        | *. R170/ R168 * * * * * .                                       |     |
| RAD51  | MYIDTEGTFRPEELLAVAERYGLSGSDVLDNVAYARAFNTDHQ-----                | 200 |
| RAD51B | VYIDTESAFSAELVIEIAESR-----FPRYFNTEEKLLITS--SKVHLYRELT           | 184 |
| RAD51C | VFIDTEGSMFVDELVDLATAACIQHLQLIAEKHKGEEHRKALEDFTLDNILSHIYFRCRD    | 215 |
| RAD51D | LYVDSNGGLTASRLQLLQAKTQDEEQAEALRRI-----QVVHAFDIFQ                | 177 |
| XRCC2  | LFIDTDYHFDMLRLVTILEHRLSQSSEEI I KY-----CLGRFFLVYCSS             | 122 |
| XRCC3  | VYICTEDAFPHKRLQLMAQQPRLRTDVPGELL-----QK---LRFSGQIFIEHVAD        | 186 |
|        | Walker B R241/<br>R258                                          |     |
| RAD51  | ----TQLLYQ--ASAM-MVESRYALLIVDSATALYRTDYS--GRGELSAEIMHLARFLRM    | 251 |
| RAD51B | CDEVLQRIES--LEEE-IISKGIKLVILDVSVASVVRKEFDAQLQGNLKERKPLAREASS    | 241 |
| RAD51C | YTELLAQVYL--LPDFLSEHSKVLVIVDGIAPFRHDLD-----DLSIRRLNLGLAQQ       | 268 |
| RAD51D | MLDVLQELRGTVAAQVVTGSSGTVIVVVVDVSVTAVVSPLLGGQQREG---LALMMQLARE   | 233 |
| XRCC2  | STHLLLTLYS--LESMFCSHPSLCLLILDLSAFYWI DRVNGG-ESVNLQESTLRKCSQC    | 179 |
| XRCC3  | VDTLLECCVNK--KVPVLLSRGMARLVVIDSVAAPFRCEPDSQAS--APRARHLQSLGAT    | 241 |
|        | N267/<br>N284                                                   |     |
| RAD51  | LLRLADEFGVAVVITNDVVAQVDGAAMFAADPKKPIG-----GNIIA                 | 293 |
| RAD51B | LKYLAEEFSPVILNNOITHLGALASQADLVSPADDLSLSEGTSGSSCVIAALGNTWS       | 301 |
| RAD51C | MISLANNHRLAVILNDMTTKIDRNOA-----LLVLPALGESWG                     | 306 |
| RAD51D | LKTLARDLGMVVVITNITRDRDS-----GRCLKPALGRSWS                       | 269 |
| XRCC2  | LEKLVNDYRLVLPATTQTIMQKASSS--EPPSHASR-----RLCDVDIDYRPVLCRAWQ     | 232 |
| XRCC3  | LRELSSAFQSPVLCINQVTEAMEEQGAH---GPLGF-----WDERVSPALGITWA         | 289 |
|        | * R299/<br>R312                                                 |     |
| RAD51  | HASTTILYLRKGRGET-----RICKIYDSPCLPEAE-AMFAINADGVGDAKD-----       | 339 |
| RAD51B | HSVNTLILQYLDSE-----RQILIAKSPLAPFTS-FVYTIKEEGLVLQETTFCSVT        | 353 |
| RAD51C | HAATIRLIFHWDR-KQ-----RLATLYKSPSQEECT-VLFQIKPQGFPRDTVVTSA CSL    | 357 |
| RAD51D | FVPSTRILLDTIEGAGASGG--RRMACLAKSSRQPTGFQEMVDIGTWGTSEQSA----TL    | 323 |
| XRCC2  | QLVKHRRMFFSKQDDSQSSNQFSLVS-RCLKSNSLKK--HFFIIGESGVFC-----        | 280 |
| XRCC3  | NQLLVRLADRLREBEAALGCPARTLRVLSAPHLPPSS-CSYTI SAEGVRGTPGTQSH--    | 346 |
|        | *. .: * *                                                       |     |
| RAD51  | -----                                                           | 339 |
| RAD51B | QAEINWAP EILPPQPPEQLGLQ MCHHTQLIF                               | 384 |
| RAD51C | QTEGSLSTRKRSRDP E EEL-----                                      | 376 |
| RAD51D | QGDQT-----                                                      | 328 |
| XRCC2  | -----                                                           | 280 |
| XRCC3  | -----                                                           | 346 |

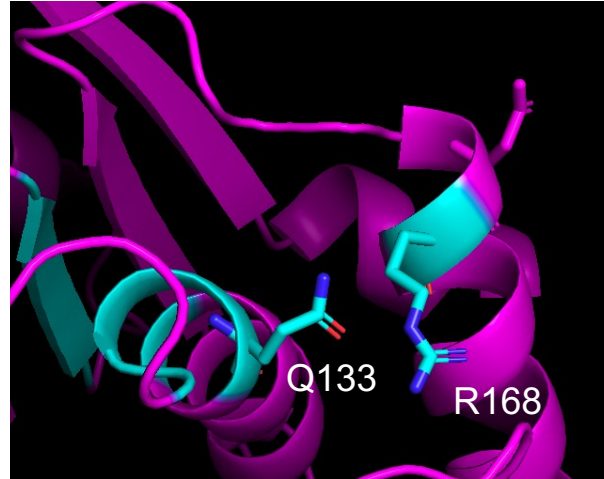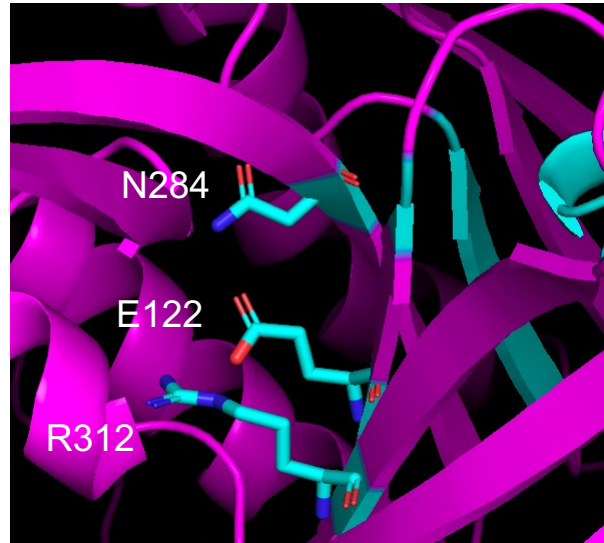



B.

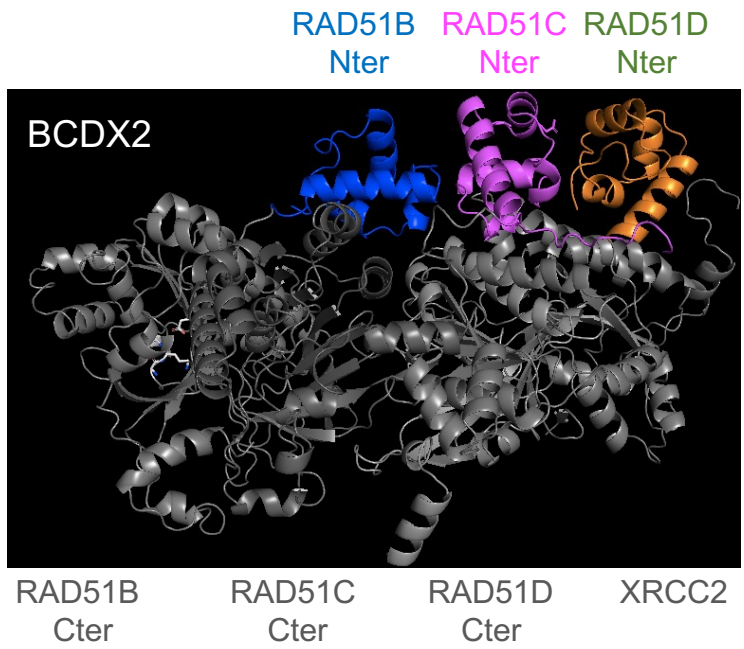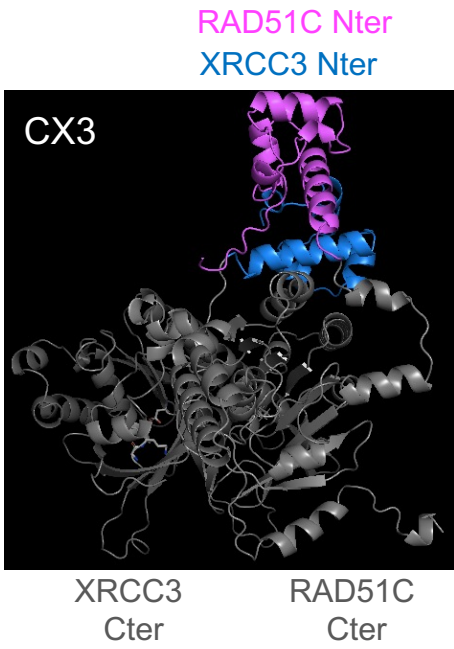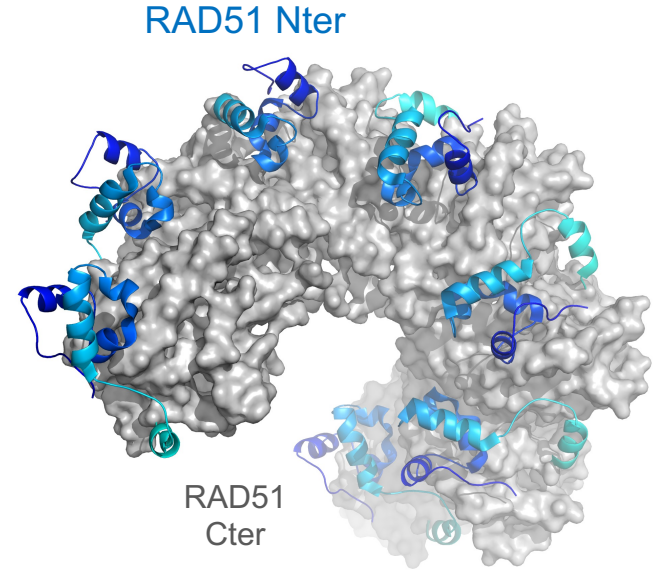

C.

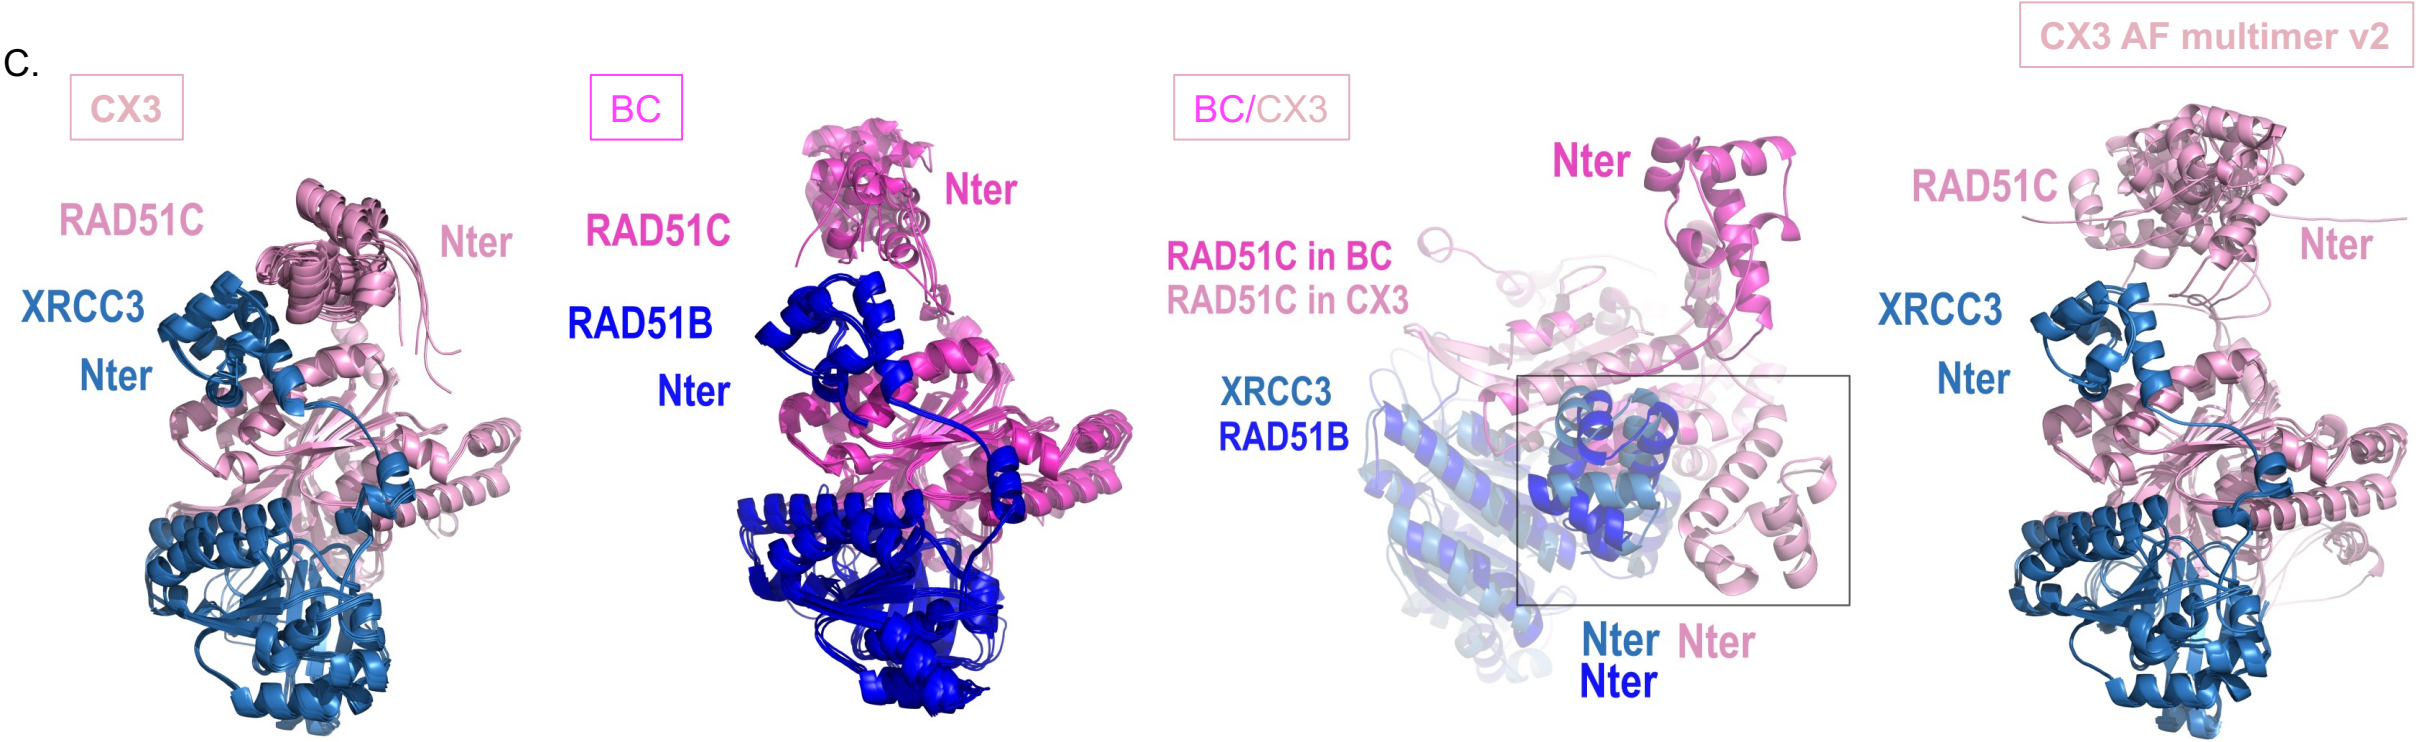

### **Supplementary Figure S7. Conservation among RAD51 paralogs.**

**A.** Human RAD51 paralogs were aligned with RAD51 using the ClustalW program. The alignment shows that RAD51 paralogs are conserved with each other and with RAD51 at the Walker A and B motifs. In addition, a few other residues in RAD51 paralogs show conservation with RAD51, including those shown on the right.

Top right: In RAD51, the glutamine following the Walker A motif forms a salt bridge with an arginine in a neighboring alpha helix. These residues are conserved in RAD51C (RAD51, Q135:R170; RAD51C, Q133:R168) and can be similarly modeled in the RAD51C AlphaFold structure, as shown. The RAD51C Q133A mutation leads to highly defective HR.

Bottom right: In RAD51, the glutamate preceding the Walker A motif forms salt bridges with an arginine and an asparagine in adjacent beta strands. These residues are conserved in RAD51C (RAD51, N267:E124:R299; RAD51C, N284:E122:R312) and can be similarly modeled in RAD51C, as shown. The RAD51C R312W mutation leads to highly defective HR.

**B.** The N-terminal domains (Nter) of the RAD51 paralogs interact with each other in the BCDX2 and CX3 complexes in structural models predicted by AlphaFold2 (version 1), unlike the N-termini of RAD51 in the filament (PDB: 5NWL (22)). The N-termini of the RAD51 paralogs and RAD51 are represented in the indicated colors with the rest of each protein in gray.

**C.** Structural models of the CX3 complex and the BC subcomplex predicted as a simple dimer. The superimposition of five models generated for CX3 by AlphaFold2 version 1 highlights the robustness of the predictions converging toward a compact state for the N-terminal domain of RAD51C bound to the XRCC3 N-terminal domain. The RAD51C N-terminal domain shows a different interaction with RAD51B N-terminal domain in the BC subcomplex. A superimposition of the two models is presented with a top view highlighting the drastic conformational difference for the RAD51C N-terminal domain in CX3 and BC. The position of the N-terminal domains in CX3 may limit alternative conformations with proteins such as RAD51D, disfavoring the formation of a DCX3 trimeric assembly. When we challenged AlphaFold2 to form the trimeric complex, however, it could be reliably modeled, with the orientation of the RAD51C terminal domain switching from a CX3-like conformation to a BCDX2-like one, indicating a limitation of AlphaFold2 version 1 in this context. We also re-modeled CX3 using AlphaFold2 version 2 and found that the predictions for the RAD51C N-terminal domain in CX3 are more variable than with version 1, as seen in the superimposition of the top five predicted models.

Supplementary Figure S8

A.

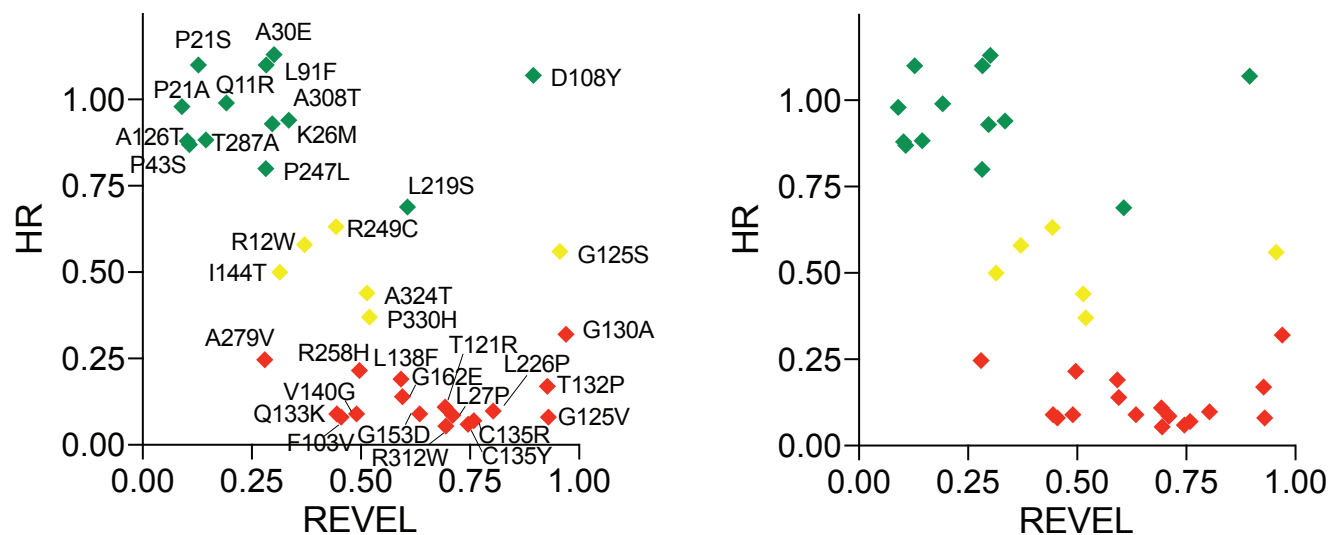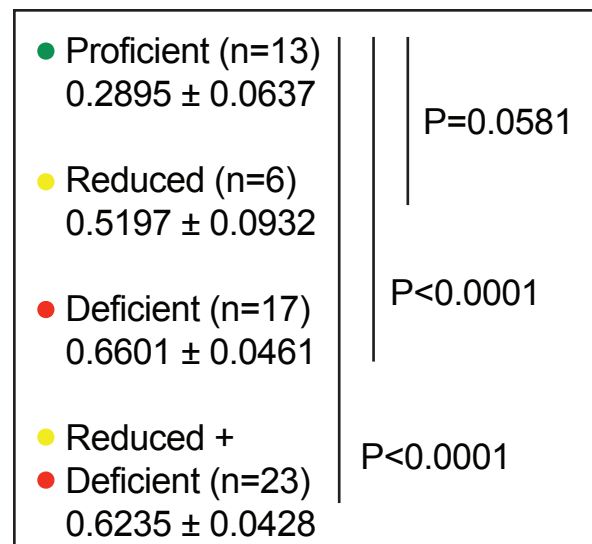

B.

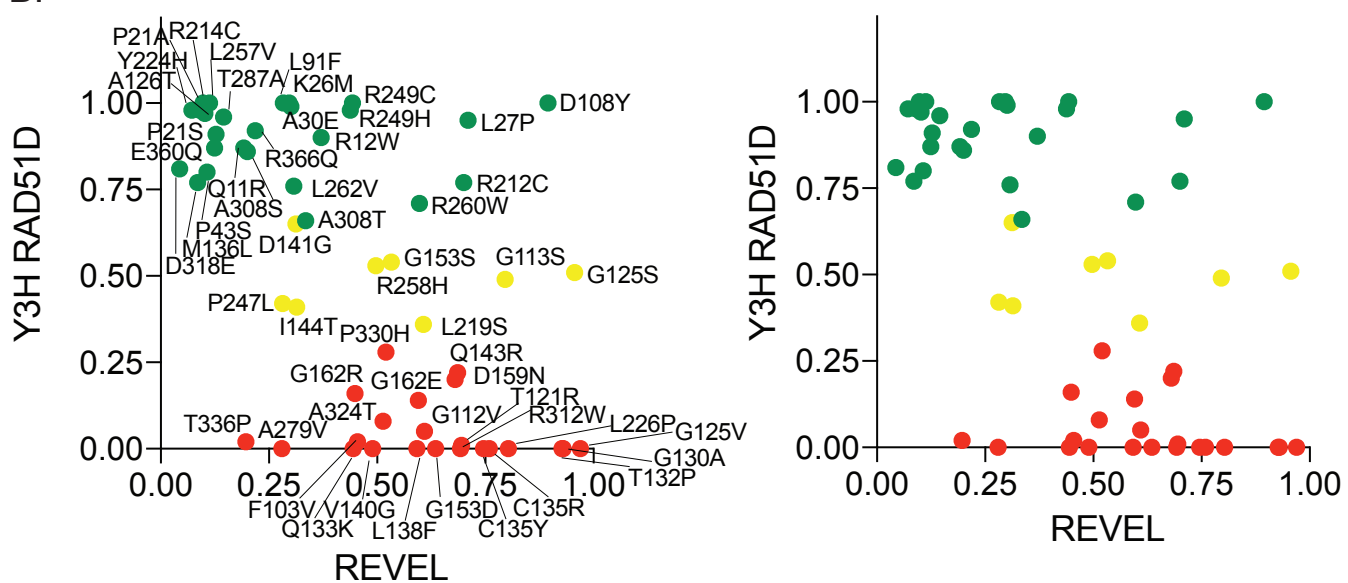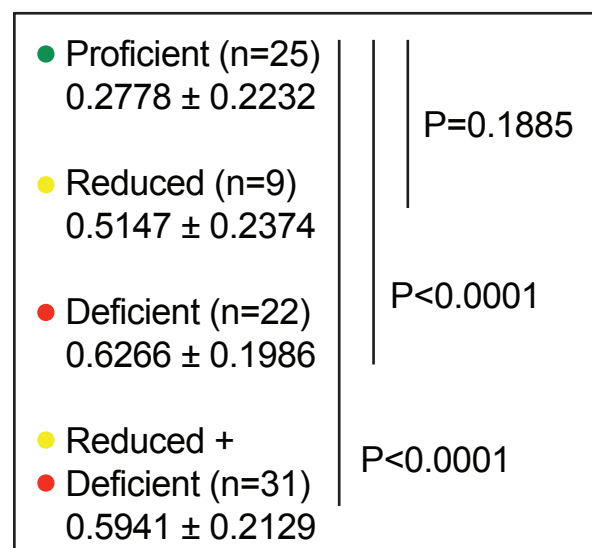

C.

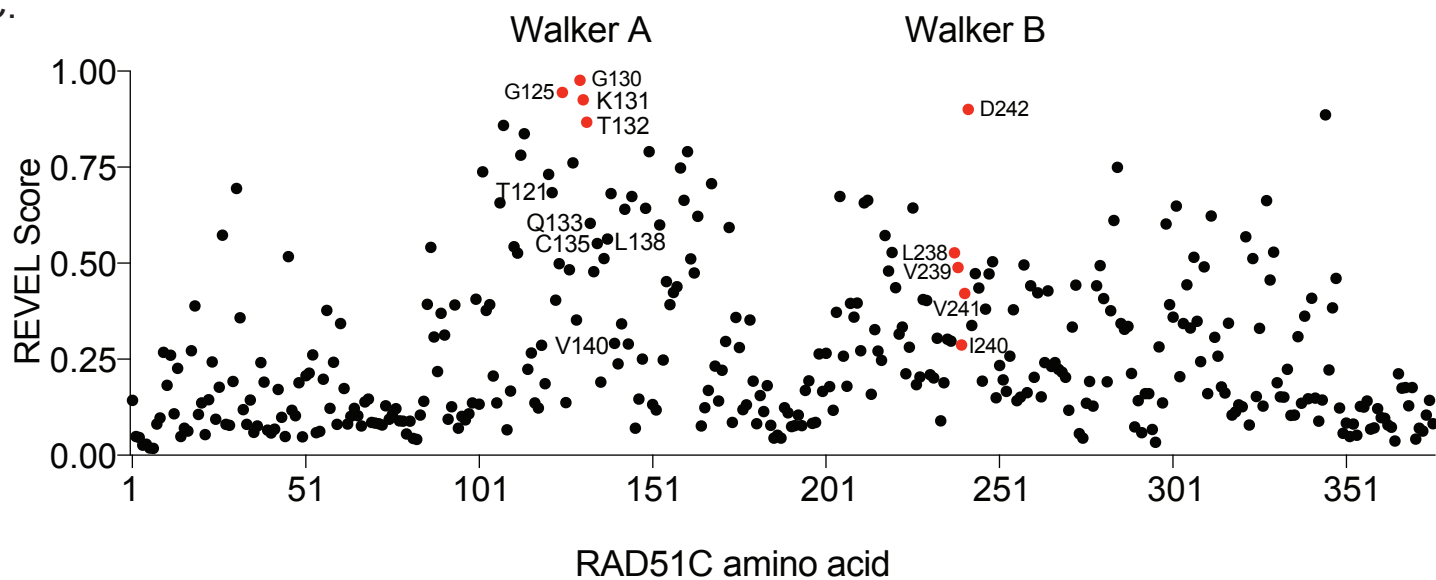

**Supplementary Figure S8. REVEL (Rare Exome Variant Ensemble Learner) scoring for the RAD51C variants analyzed in this study.**

**A,B.** For each RAD51C variant, HR activity (**A**) and RAD51D interaction in Y3H studies (**B**) are plotted relative to the REVEL score (<https://sites.google.com/site/revelgenomics/about?authuser=0>). Plots are shown with and without variant labels. Colors indicate proficient (green), reduced (yellow), deficient (red) activity (see **Fig. 2**). Statistics shown are from an unpaired t test. Variants that were HR or interaction proficient had statistically significant lower REVEL scores on average than those that were deficient ( $P < 0.0001$ ). Several variants proficient in functional assays but were nonetheless predicted to be deleterious by in silico tools (**Fig. 3**) had low REVEL scores, indicating better performance. Notable among these is the population variant T287A, for which homozygous individuals have been identified, and a group of variants in the N terminus (P21S, K26M, A30E, L91F).

**C.** Compiled REVEL scores are plotted each RAD51C residue. Each dot represents the average of the REVEL scores for all of the reported variants at that residue (**Supplementary Table S6B**). The Walker A motif GxxxxGKT residues form a cluster with the highest REVEL scores, in agreement with the strong defects observed in functional assays. The last residue of the Walker B motif (LVIVD) also scores very high. The scores for the other Walker B residues are lower in part due to frequent conservative missense substitutions among the variants (i.e., L, V, and I); nonconservative substitutions lead to higher scores (i.e., by  $\sim 0.1$ ). N terminal residues tend to have low scores, in agreement with HR proficiency observed in functional assays.



## Supplementary References

1. Adzhubei IA, Schmidt S, Peshkin L, Ramensky VE, Gerasimova A, Bork P, Kondrashov AS, & Sunyaev SR (2010) A method and server for predicting damaging missense mutations. *Nat. Methods* 7:248-249.
2. Sim NL, Kumar P, Hu J, Henikoff S, Schneider G, & Ng PC (2012) SIFT web server: predicting effects of amino acid substitutions on proteins. *Nucleic Acids Res.* 40:W452-457.
3. Choi Y & Chan AP (2015) PROVEAN web server: a tool to predict the functional effect of amino acid substitutions and indels. *Bioinformatics* 31:2745-2747.
4. Choi Y, Sims GE, Murphy S, Miller JR, & Chan AP (2012) Predicting the functional effect of amino acid substitutions and indels. *PLoS One* 7:e46688.
5. Garcin EB, Gon S, Sullivan MR, Brunette GJ, Cian A, Concordet JP, Giovannangeli C, Dirks WG, *et al.* (2019) Differential Requirements for the RAD51 Paralogs in Genome Repair and Maintenance in Human Cells. *PLoS Genet.* 15:e1008355.
6. Feng W & Jasin M (2017) BRCA2 suppresses replication stress-induced mitotic and G1 abnormalities through homologous recombination. *Nat Commun.* 8:525.
7. Brunet E, Simsek D, Tomishima M, DeKolver R, Choi VM, Gregory P, Urnov F, Weinstock DM, *et al.* (2009) Chromosomal translocations induced at specified loci in human stem cells. *Proc. Natl. Acad. Sci. U S A* 106:10620-10625.
8. Richardson C, Moynahan ME, & Jasin M (1998) Double-strand break repair by interchromosomal recombination: suppression of chromosomal translocations. *Genes Dev.* 12:3831-3842.
9. McClendon TB, Sullivan MR, Bernstein KA, & Yanowitz JL (2016) Promotion of Homologous Recombination by SWS-1 in Complex with RAD-51 Paralogs in *Caenorhabditis elegans*. *Genetics* 203:133-145.
10. Knop M, Siegers K, Pereira G, Zachariae W, Winsor B, Nasmyth K, & Schiebel E (1999) Epitope tagging of yeast genes using a PCR-based strategy: more tags and improved practical routines. *Yeast* 15:963-972.
11. Gaines WA, Godin SK, Kabbinavar FF, Rao T, VanDemark AP, Sung P, & Bernstein KA (2015) Promotion of presynaptic filament assembly by the ensemble of *S. cerevisiae* Rad51 paralogues with Rad52. *Nat. Commun.* 6:7834.
12. UniProt C (2021) UniProt: the universal protein knowledgebase in 2021. *Nucleic Acids Res.* 49:D480-D489.
13. Steinegger M & Soding J (2017) MMseqs2 enables sensitive protein sequence searching for the analysis of massive data sets. *Nat. Biotechnol.* 35:1026-1028.
14. Mirdita M, Schütze K, Moriwaki Y, Heo L, Ovchinnikov S, & Steinegger M (2021) ColabFold - Making protein folding accessible to all. *bioRxiv:2021.2008.2015.456425*.
15. Katoh K & Standley DM (2013) MAFFT multiple sequence alignment software version 7: improvements in performance and usability. *Mol. Biol. Evol.* 30:772-780.
16. Jumper J, Evans R, Pritzel A, Green T, Figurnov M, Ronneberger O, Tunyasuvunakool K, Bates R, *et al.* (2021) Highly accurate protein structure prediction with AlphaFold. *Nature* 596:583-589.
17. Evans R, O'Neill M, Pritzel A, Antropova N, Senior A, Green T, Židek A, Bates R, *et al.* (2021) Protein complex prediction with AlphaFold-Multimer. *bioRxiv:2021.2010.2004.463034*.
18. Leman JK, Weitzner BD, Lewis SM, Adolf-Bryfogle J, Alam N, Alford RF, Aprahamian M, Baker D, *et al.* (2020) Macromolecular modeling and design in Rosetta: recent methods and frameworks. *Nat Methods* 17:665-680.
19. Hubbard SJ & Thornton JM (1993) 'NACCESS'. *Computer Program, Department of Biochemistry and Molecular Biology, University College London*.
20. Schild D, Lio YC, Collins DW, Tsomondo T, & Chen DJ (2000) Evidence for simultaneous protein interactions between human Rad51 paralogs. *J Biol Chem* 275:16443-16449.
21. Baldock RA, Pressimone CA, Baird JM, Khodakov A, Luong TT, McKenzie KG, Smith CM, Karpenshif Y, *et al.* (2019) RAD51D splice variants and cancer-associated mutations reveal XRCC2 interaction to be critical for homologous recombination. *DNA Repair* 76:99-107.
22. Brouwer I, Moschetti T, Candelli A, Garcin EB, Modesti M, Pellegrini L, Wuite GJ, & Peterman EJ (2018) Two distinct conformational states define the interaction of human RAD51-ATP with single-stranded DNA. *EMBO J.* 37.
23. Xu J, Zhao L, Xu Y, Zhao W, Sung P, & Wang HW (2017) Cryo-EM structures of human RAD51 recombinase filaments during catalysis of DNA-strand exchange. *Nat. Struct. Mol. Biol.* 24:40-46.

**Supplementary Table S1. RAD51C missense variants reported in ClinVar.**

| <b>Variant</b> | <b>Clinical Significance (Last Reviewed)</b>                              |  |
|----------------|---------------------------------------------------------------------------|--|
| M1L            | Uncertain significance(Last reviewed: Sep 8, 2020)                        |  |
| M1V            | Uncertain significance(Last reviewed: Dec 3, 2020)                        |  |
| M1I            | Uncertain significance(Last reviewed: Dec 15, 2020)                       |  |
| R2G            | Uncertain significance(Last reviewed: Dec 20, 2018)                       |  |
| G3W            | Uncertain significance(Last reviewed: Oct 25, 2019)                       |  |
| G3R            | Conflicting interpretations of pathogenicity(Last reviewed: Jan 20, 2021) |  |
| G3E            | Uncertain significance(Last reviewed: Sep 20, 2018)                       |  |
| G3A            | Uncertain significance(Last reviewed: Jan 13, 2017)                       |  |
| T5R            | Uncertain significance(Last reviewed: Jul 25, 2019)                       |  |
| T5M            | Uncertain significance(Last reviewed: Oct 29, 2020)                       |  |
| F6V            | Uncertain significance(Last reviewed: May 28, 2019)                       |  |
| F6Y            | Uncertain significance(Last reviewed: Oct 31, 2019)                       |  |
| F6L            | Uncertain significance(Last reviewed: Dec 30, 2019)                       |  |
| R7G            | Uncertain significance(Last reviewed: Nov 4, 2018)                        |  |
| R7S            | Uncertain significance(Last reviewed: Oct 28, 2020)                       |  |
| R7C            | Uncertain significance(Last reviewed: Jun 21, 2020)                       |  |
| R7L            | Uncertain significance(Last reviewed: Aug 6, 2020)                        |  |
| R7P            | Uncertain significance(Last reviewed: May 1, 2019)                        |  |
| R7H            | Uncertain significance(Last reviewed: Mar 30, 2018)                       |  |
| F8L            | Uncertain significance(Last reviewed: Aug 20, 2020)                       |  |
| E9Q            | Uncertain significance(Last reviewed: Nov 18, 2018)                       |  |
| E9V            | Uncertain significance(Last reviewed: Oct 7, 2020)                        |  |
| M10L           | Uncertain significance(Last reviewed: Dec 22, 2020)                       |  |
| M10T           | Uncertain significance(Last reviewed: Apr 28, 2020)                       |  |
| M10R           | Uncertain significance(Last reviewed: Oct 28, 2020)                       |  |
| M10I           | Uncertain significance(Last reviewed: Dec 18, 2019)                       |  |
| Q11R           | Uncertain significance(Last reviewed: Sep 8, 2020)                        |  |
| R12G           | Uncertain significance(Last reviewed: Aug 25, 2018)                       |  |
| R12W           | Uncertain significance(Last reviewed: Jun 10, 2021)                       |  |
| R12P           | Uncertain significance(Last reviewed: Aug 13, 2019)                       |  |
| R12Q           | Uncertain significance(Last reviewed: Mar 29, 2019)                       |  |
| D13N           | Uncertain significance(Last reviewed: Apr 13, 2018)                       |  |
| D13H           | Uncertain significance(Last reviewed: Mar 30, 2018)                       |  |
| V15A           | Uncertain significance(Last reviewed: Aug 4, 2020)                        |  |
| V15G           | Uncertain significance(Last reviewed: Feb 26, 2020)                       |  |

|      |                                                     |  |
|------|-----------------------------------------------------|--|
| S16G | Uncertain significance(Last reviewed: Mar 5, 2020)  |  |
| S16N | Uncertain significance(Last reviewed: Dec 29, 2017) |  |
| F17C | Uncertain significance(Last reviewed: Sep 2, 2020)  |  |
| F17S | Uncertain significance(Last reviewed: Jul 25, 2020) |  |
| F17L | Uncertain significance(Last reviewed: Feb 16, 2019) |  |
| P18S | Uncertain significance(Last reviewed: Sep 9, 2020)  |  |
| P18R | Uncertain significance(Last reviewed: Sep 4, 2019)  |  |
| P18L | Uncertain significance(Last reviewed: Aug 3, 2020)  |  |
| L19M | Uncertain significance(Last reviewed: Jan 2, 2017)  |  |
| L19P | Uncertain significance(Last reviewed: Jan 8, 2020)  |  |
| S20F | Uncertain significance(Last reviewed: Sep 14, 2019) |  |
| S20C | Uncertain significance(Last reviewed: Mar 30, 2018) |  |
| P21A | Uncertain significance(Last reviewed: Mar 29, 2019) |  |
| P21S | Uncertain significance(Last reviewed: Mar 27, 2019) |  |
| P21L | Uncertain significance(Last reviewed: Aug 10, 2020) |  |
| V23G | Uncertain significance(Last reviewed: May 1, 2019)  |  |
| R24G | Uncertain significance(Last reviewed: Jan 3, 2019)  |  |
| R24W | Uncertain significance(Last reviewed: Nov 13, 2015) |  |
| R24L | Uncertain significance(Last reviewed: Aug 11, 2016) |  |
| R24Q | Uncertain significance(Last reviewed: Jul 21, 2019) |  |
| V25L | Uncertain significance(Last reviewed: Dec 13, 2019) |  |
| V25M | Uncertain significance(Last reviewed: Oct 26, 2018) |  |
| V25A | Uncertain significance(Last reviewed: Jan 20, 2020) |  |
| K26E | Uncertain significance(Last reviewed: Sep 28, 2019) |  |
| K26M | Uncertain significance(Last reviewed: Oct 7, 2020)  |  |
| L27P | Uncertain significance(Last reviewed: May 11, 2021) |  |
| V28L | Uncertain significance(Last reviewed: May 9, 2016)  |  |
| V28M | Uncertain significance(Last reviewed: Jun 20, 2016) |  |
| S29F | Uncertain significance(Last reviewed: Jan 23, 2020) |  |
| A30P | Uncertain significance(Last reviewed: Oct 5, 2020)  |  |
| A30S | Uncertain significance(Last reviewed: Apr 3, 2019)  |  |
| A30V | Uncertain significance(Last reviewed: Oct 9, 2020)  |  |
| G31E | Uncertain significance(Last reviewed: Sep 12, 2019) |  |
| F32L | Uncertain significance(Last reviewed: Oct 22, 2018) |  |
| Q33H | Uncertain significance(Last reviewed: Aug 8, 2019)  |  |
| T34I | Uncertain significance(Last reviewed: Jul 26, 2019) |  |
| A35S | Uncertain significance(Last reviewed: Jun 17, 2020) |  |
| A35V | Uncertain significance(Last reviewed: Dec 23, 2019) |  |

|      |                                                                          |  |
|------|--------------------------------------------------------------------------|--|
| A35G | Uncertain significance(Last reviewed: Oct 21, 2020)                      |  |
| E36K | Conflicting interpretations of pathogenicity(Last reviewed: Oct 3, 2020) |  |
| E37Q | Uncertain significance(Last reviewed: Sep 4, 2020)                       |  |
| L38P | Uncertain significance(Last reviewed: Apr 25, 2019)                      |  |
| L39I | Uncertain significance(Last reviewed: Oct 16, 2020)                      |  |
| L39V | Uncertain significance(Last reviewed: Oct 1, 2020)                       |  |
| E40K | Uncertain significance(Last reviewed: Feb 10, 2020)                      |  |
| E40G | Uncertain significance(Last reviewed: Oct 2, 2017)                       |  |
| V41L | Uncertain significance(Last reviewed: Jul 5, 2018)                       |  |
| V41M | Uncertain significance(Last reviewed: Mar 12, 2021)                      |  |
| V41L | Uncertain significance(Last reviewed: May 29, 2020)                      |  |
| P43T | Uncertain significance(Last reviewed: Nov 17, 2018)                      |  |
| P43S | Uncertain significance(Last reviewed: Feb 28, 2019)                      |  |
| P43L | Uncertain significance(Last reviewed: Oct 3, 2019)                       |  |
| E45K | Uncertain significance(Last reviewed: Jan 9, 2018)                       |  |
| E45A | Uncertain significance(Last reviewed: Aug 24, 2020)                      |  |
| E45G | Conflicting interpretations of pathogenicity(Last reviewed: Nov 1, 2020) |  |
| E45D | Uncertain significance(Last reviewed: May 22, 2019)                      |  |
| L46F | Uncertain significance(Last reviewed: Mar 29, 2019)                      |  |
| L46I | Uncertain significance(Last reviewed: Mar 29, 2017)                      |  |
| S47G | Uncertain significance(Last reviewed: Oct 8, 2019)                       |  |
| S47R | Uncertain significance(Last reviewed: Dec 27, 2019)                      |  |
| S47N | Uncertain significance(Last reviewed: Aug 6, 2020)                       |  |
| E49K | Uncertain significance(Last reviewed: May 7, 2019)                       |  |
| G51V | Uncertain significance(Last reviewed: Feb 24, 2020)                      |  |
| G51A | Uncertain significance(Last reviewed: Jul 21, 2019)                      |  |
| I52V | Uncertain significance(Last reviewed: Dec 31, 2017)                      |  |
| I52L | Uncertain significance(Last reviewed: Oct 19, 2020)                      |  |
| I52M | Uncertain significance(Last reviewed: Aug 8, 2019)                       |  |
| S53P | Uncertain significance(Last reviewed: Dec 6, 2019)                       |  |
| S53C | Uncertain significance(Last reviewed: Jan 31, 2020)                      |  |
| K54E | Uncertain significance(Last reviewed: Apr 24, 2018)                      |  |
| K54T | Uncertain significance(Last reviewed: Jun 21, 2020)                      |  |
| A55T | Uncertain significance(Last reviewed: Oct 21, 2020)                      |  |
| A55V | Uncertain significance(Last reviewed: Sep 23, 2020)                      |  |
| E56G | Uncertain significance(Last reviewed: Dec 26, 2019)                      |  |
| A57T | Uncertain significance(Last reviewed: Jul 21, 2020)                      |  |
| A57G | Uncertain significance(Last reviewed: Mar 10, 2020)                      |  |

|      |                                                     |  |
|------|-----------------------------------------------------|--|
| T60A | Uncertain significance(Last reviewed: Jul 1, 2020)  |  |
| Q62R | Uncertain significance(Last reviewed: Sep 2, 2020)  |  |
| Q62H | Uncertain significance(Last reviewed: Nov 4, 2019)  |  |
| I63M | Uncertain significance(Last reviewed: Jan 16, 2020) |  |
| I64V | Uncertain significance(Last reviewed: Oct 25, 2020) |  |
| I64F | Uncertain significance(Last reviewed: Jun 29, 2020) |  |
| I64T | Uncertain significance(Last reviewed: Aug 10, 2017) |  |
| R65G | Uncertain significance(Last reviewed: Oct 24, 2016) |  |
| R65T | Uncertain significance(Last reviewed: Jan 27, 2021) |  |
| R66S | Uncertain significance(Last reviewed: Dec 21, 2016) |  |
| E67Q | Uncertain significance(Last reviewed: Oct 18, 2019) |  |
| E67G | Uncertain significance(Last reviewed: Nov 16, 2020) |  |
| L69P | Uncertain significance(Last reviewed: Jul 21, 2019) |  |
| T70I | Uncertain significance(Last reviewed: Dec 6, 2016)  |  |
| N71Y | Uncertain significance(Last reviewed: Mar 8, 2020)  |  |
| N71S | Uncertain significance(Last reviewed: Oct 29, 2020) |  |
| N71T | Uncertain significance(Last reviewed: Aug 1, 2019)  |  |
| K72E | Uncertain significance(Last reviewed: Jan 20, 2021) |  |
| P73S | Uncertain significance(Last reviewed: Feb 2, 2020)  |  |
| P73A | Uncertain significance(Last reviewed: Jun 21, 2017) |  |
| Y75C | Uncertain significance(Last reviewed: Jul 22, 2020) |  |
| A76T | Uncertain significance(Last reviewed: Oct 2, 2019)  |  |
| A76P | Uncertain significance(Last reviewed: Oct 28, 2019) |  |
| A76G | Uncertain significance(Last reviewed: Nov 8, 2019)  |  |
| A76V | Uncertain significance(Last reviewed: Feb 28, 2019) |  |
| G77D | Uncertain significance(Last reviewed: Sep 16, 2020) |  |
| G77A | Uncertain significance(Last reviewed: Feb 7, 2019)  |  |
| T78I | Uncertain significance(Last reviewed: Oct 27, 2020) |  |
| S79P | Uncertain significance(Last reviewed: May 15, 2018) |  |
| S79T | Uncertain significance(Last reviewed: Apr 3, 2019)  |  |
| S79F | Uncertain significance(Last reviewed: Sep 15, 2020) |  |
| E80G | Uncertain significance(Last reviewed: Jun 6, 2019)  |  |
| E80D | Uncertain significance(Last reviewed: Mar 29, 2018) |  |
| S81L | Uncertain significance(Last reviewed: Dec 18, 2019) |  |
| H82Y | Uncertain significance(Last reviewed: Nov 29, 2018) |  |
| H82R | Uncertain significance(Last reviewed: Jul 26, 2020) |  |
| H82Q | Uncertain significance(Last reviewed: Sep 21, 2017) |  |
| K83E | Uncertain significance(Last reviewed: Jun 3, 2020)  |  |

|       |                                                     |  |
|-------|-----------------------------------------------------|--|
| K83T  | Uncertain significance(Last reviewed: Jun 15, 2020) |  |
| K83R  | Uncertain significance(Last reviewed: Jun 22, 2017) |  |
| K84N  | Uncertain significance(Last reviewed: Oct 20, 2020) |  |
| C85R  | Uncertain significance(Last reviewed: Dec 6, 2017)  |  |
| C85G  | Uncertain significance(Last reviewed: Aug 14, 2020) |  |
| C85Y  | Uncertain significance(Last reviewed: Jun 23, 2020) |  |
| T86I  | Uncertain significance(Last reviewed: Mar 18, 2020) |  |
| A87S  | Uncertain significance(Last reviewed: Mar 29, 2019) |  |
| A87T  | Uncertain significance(Last reviewed: May 20, 2020) |  |
| A87E  | Uncertain significance(Last reviewed: Mar 29, 2019) |  |
| L88V  | Uncertain significance(Last reviewed: Jan 5, 2018)  |  |
| E89Q  | Uncertain significance(Last reviewed: Oct 14, 2019) |  |
| E89K  | Uncertain significance(Last reviewed: Jun 21, 2020) |  |
| E89G  | Uncertain significance(Last reviewed: Sep 15, 2020) |  |
| L90F  | Uncertain significance(Last reviewed: Jan 16, 2020) |  |
| L90R  | Uncertain significance(Last reviewed: May 4, 2020)  |  |
| L90H  | Uncertain significance(Last reviewed: Jul 21, 2015) |  |
| L91F  | Uncertain significance(Last reviewed: Feb 10, 2017) |  |
| L91P  | Uncertain significance(Last reviewed: Sep 14, 2017) |  |
| E92K  | Uncertain significance(Last reviewed: Nov 14, 2019) |  |
| E94K  | Uncertain significance(Last reviewed: Nov 20, 2019) |  |
| H95Y  | Uncertain significance(Last reviewed: Dec 27, 2019) |  |
| H95L  | Uncertain significance(Last reviewed: Feb 20, 2019) |  |
| H95P  | Uncertain significance(Last reviewed: May 30, 2019) |  |
| H95Q  | Uncertain significance(Last reviewed: Oct 7, 2020)  |  |
| T96P  | Uncertain significance(Last reviewed: Jul 19, 2019) |  |
| T96S  | Uncertain significance(Last reviewed: Jan 14, 2020) |  |
| Q97E  | Uncertain significance(Last reviewed: Sep 23, 2020) |  |
| Q97R  | Uncertain significance(Last reviewed: Oct 26, 2019) |  |
| G98V  | Uncertain significance(Last reviewed: Sep 27, 2019) |  |
| G98A  | Uncertain significance(Last reviewed: May 16, 2019) |  |
| F99L  | Uncertain significance(Last reviewed: Aug 16, 2016) |  |
| F99S  | Uncertain significance(Last reviewed: Oct 7, 2020)  |  |
| I100K | Uncertain significance(Last reviewed: May 18, 2019) |  |
| I101V | Uncertain significance(Last reviewed: May 18, 2021) |  |
| T102A | Uncertain significance(Last reviewed: Jun 6, 2020)  |  |
| T102N | Uncertain significance(Last reviewed: Nov 4, 2019)  |  |
| T102I | Uncertain significance(Last reviewed: Nov 4, 2019)  |  |

|       |                                                      |  |
|-------|------------------------------------------------------|--|
| F103I | Uncertain significance(Last reviewed: May 14, 2018)  |  |
| F103V | Uncertain significance(Last reviewed: Jun 13, 2017)  |  |
| F103L | Uncertain significance(Last reviewed: Apr 24, 2019)  |  |
| C104Y | Uncertain significance(Last reviewed: Dec 18, 2018)  |  |
| A106V | Uncertain significance(Last reviewed: Jun 6, 2019)   |  |
| D108H | Uncertain significance(Last reviewed: Nov 28, 2018)  |  |
| D108G | Uncertain significance(Last reviewed: Sep 18, 2020)  |  |
| D109Y | Uncertain significance(Last reviewed: Mar 29, 2019)  |  |
| I110S | Uncertain significance(Last reviewed: Jan 16, 2019)  |  |
| L111F | Uncertain significance(Last reviewed: Oct 22, 2018)  |  |
| G112E | Uncertain significance(Last reviewed: Dec 3, 2018)   |  |
| G112V | Uncertain significance(Last reviewed: Feb 15, 2021)  |  |
| G112A | Uncertain significance(Last reviewed: Oct 16, 2020)  |  |
| G113R | Uncertain significance(Last reviewed: May 29, 2020)  |  |
| G113D | Uncertain significance(Last reviewed: Oct 22, 2019)  |  |
| G114R | Uncertain significance(Last reviewed: Aug 14, 2020)  |  |
| G114V | Uncertain significance(Last reviewed: Apr 3, 2019)   |  |
| V115A | Uncertain significance(Last reviewed: Dec 29, 2018)  |  |
| P116H | Uncertain significance(Last reviewed: Oct 13, 2019)  |  |
| L117S | Uncertain significance(Last reviewed: Dec 7, 2018)   |  |
| L117F | Uncertain significance(Last reviewed: May 21, 2019)  |  |
| M118I | Uncertain significance(Last reviewed: May 24, 2019)  |  |
| K119R | Uncertain significance(Last reviewed: Nov 16, 2019)  |  |
| T121A | Uncertain significance(Last reviewed: Oct 27, 2020)  |  |
| T121I | Uncertain significance(Last reviewed: Aug 12, 2019)  |  |
| E122D | Uncertain significance(Last reviewed: Oct 6, 2020)   |  |
| I123V | Uncertain significance(Last reviewed: Jul 19, 2017)  |  |
| C124G | Uncertain significance(Last reviewed: Mar 29, 2019)  |  |
| C124S | Uncertain significance(Last reviewed: Sep 8, 2020)   |  |
| G125S | Uncertain significance(Last reviewed: Jul 31, 2020)  |  |
| G125D | Uncertain significance(Last reviewed: Mar 10, 2020)  |  |
| G125V | Pathogenic, risk factor(Last reviewed: Feb 28, 2020) |  |
| A126T | Benign/Likely benign(Last reviewed: Dec 7, 2020)     |  |
| A126V | Uncertain significance(Last reviewed: Nov 12, 2018)  |  |
| P127S | Uncertain significance(Last reviewed: Dec 14, 2017)  |  |
| P127T | Uncertain significance(Last reviewed: Feb 29, 2020)  |  |
| G128R | Uncertain significance(Last reviewed: May 29, 2020)  |  |
| G128D | Uncertain significance(Last reviewed: Mar 29, 2019)  |  |

|                 |                                                           |            |
|-----------------|-----------------------------------------------------------|------------|
| G128A           | Uncertain significance(Last reviewed: Nov 29, 2018)       |            |
| V129I           | Uncertain significance(Last reviewed: Jan 30, 2017)       |            |
| V129A           | Uncertain significance(Last reviewed: Jul 2, 2018)        |            |
| G130A           | Uncertain significance(Last reviewed: Jul 15, 2019)       |            |
| K131I           | Uncertain significance(Last reviewed: Jul 18, 2018)       |            |
| T132P           | Likely pathogenic(Last reviewed: Jan 28, 2021)            |            |
| T132I           | Uncertain significance(Last reviewed: May 22, 2015)       |            |
| T132R           | Uncertain significance(Last reviewed: Feb 1, 2020)        |            |
| Q133K           | Uncertain significance(Last reviewed: Oct 29, 2018)       |            |
| Q133E           | Uncertain significance(Last reviewed: Sep 2, 2020)        |            |
| L134S           | Uncertain significance(Last reviewed: Nov 25, 2017)       |            |
| C135R, (W135R)# | Uncertain significance(Last reviewed: Sep 9, 2020)        | #Isoform 2 |
| C135F, (W135L)# | Likely pathogenic(Last reviewed: Jun 18, 2019)            | #Isoform 2 |
| C135S, (W135S)# | Pathogenic/Likely pathogenic(Last reviewed: Mar 19, 2021) | #Isoform 2 |
| C135Y, (W135*)# | Likely pathogenic(Last reviewed: Oct 7, 2020)             | #Isoform 2 |
| M136L           | Uncertain significance(Last reviewed: Oct 15, 2020)       |            |
| M136I           | Uncertain significance(Last reviewed: Oct 20, 2020)       |            |
| Q137P           | Uncertain significance(Last reviewed: Apr 15, 2020)       |            |
| Q137H           | Uncertain significance(Last reviewed: Sep 11, 2020)       |            |
| L138F           | Pathogenic/Likely pathogenic(Last reviewed: Oct 27, 2020) |            |
| A139T           | Uncertain significance(Last reviewed: Oct 28, 2019)       |            |
| A139P           | Uncertain significance(Last reviewed: May 2, 2019)        |            |
| A139V           | Uncertain significance(Last reviewed: Sep 13, 2019)       |            |
| V140L           | Uncertain significance(Last reviewed: Apr 7, 2017)        |            |
| V140I           | Uncertain significance(Last reviewed: Aug 3, 2020)        |            |
| V140E           | Uncertain significance(Last reviewed: Mar 9, 2020)        |            |
| D141N           | Uncertain significance(Last reviewed: Feb 18, 2015)       |            |
| D141G           | Uncertain significance(Last reviewed: Jul 27, 2020)       |            |
| D141E           | Uncertain significance(Last reviewed: Nov 9, 2019)        |            |
| Q143R           | Uncertain significance(Last reviewed: Oct 30, 2020)       |            |
| I144L           | Uncertain significance(Last reviewed: Nov 15, 2018)       |            |
| I144T           | Uncertain significance(Last reviewed: May 27, 2021)       |            |
| I144M           | Uncertain significance(Last reviewed: Apr 29, 2016)       |            |
| P145T           | Uncertain significance(Last reviewed: Mar 14, 2019)       |            |
| P145S           | Uncertain significance(Last reviewed: Sep 26, 2018)       |            |
| P145A           | Uncertain significance(Last reviewed: May 26, 2016)       |            |
| P145L           | Uncertain significance(Last reviewed: May 27, 2020)       |            |
| C147R           | Uncertain significance(Last reviewed: Mar 19, 2020)       |            |



|       |                                                                           |  |
|-------|---------------------------------------------------------------------------|--|
| C147Y | Uncertain significance(Last reviewed: Mar 5, 2019)                        |  |
| F148C | Uncertain significance(Last reviewed: May 24, 2019)                       |  |
| F148S | Uncertain significance(Last reviewed: Oct 14, 2015)                       |  |
| G149E | Uncertain significance(Last reviewed: Oct 23, 2019)                       |  |
| G150R | Uncertain significance(Last reviewed: Nov 28, 2019)                       |  |
| G150E | Uncertain significance(Last reviewed: Sep 8, 2014)                        |  |
| V151L | Uncertain significance(Last reviewed: May 31, 2019)                       |  |
| V151M | Uncertain significance(Last reviewed: Jan 26, 2021)                       |  |
| A152T | Uncertain significance(Last reviewed: Nov 26, 2019)                       |  |
| A152S | Uncertain significance(Last reviewed: Oct 4, 2020)                        |  |
| G153D | Uncertain significance(Last reviewed: Jul 20, 2020)                       |  |
| E154K | Uncertain significance(Last reviewed: Sep 3, 2018)                        |  |
| E154G | Conflicting interpretations of pathogenicity(Last reviewed: Jun 13, 2020) |  |
| A155T | Uncertain significance(Last reviewed: Feb 20, 2020)                       |  |
| A155G | Uncertain significance(Last reviewed: May 30, 2019)                       |  |
| V156D | Uncertain significance(Last reviewed: Mar 28, 2019)                       |  |
| F157C | Uncertain significance(Last reviewed: Feb 21, 2017)                       |  |
| I158T | Uncertain significance(Last reviewed: Feb 27, 2020)                       |  |
| D159N | Conflicting interpretations of pathogenicity(Last reviewed: Nov 2, 2014)  |  |
| D159G | Uncertain significance(Last reviewed: May 15, 2018)                       |  |
| D159A | Uncertain significance(Last reviewed: May 20, 2019)                       |  |
| D159E | Uncertain significance(Last reviewed: Aug 21, 2020)                       |  |
| E161Q | Uncertain significance(Last reviewed: Oct 30, 2019)                       |  |
| E161V | Uncertain significance(Last reviewed: Apr 26, 2020)                       |  |
| E161D | Uncertain significance(Last reviewed: Jan 21, 2020)                       |  |
| G162E | Uncertain significance(Last reviewed: Jul 30, 2020)                       |  |
| S163G | Uncertain significance(Last reviewed: Jan 26, 2020)                       |  |
| S163C | Uncertain significance(Last reviewed: Aug 9, 2017)                        |  |
| S163N | Uncertain significance(Last reviewed: Sep 26, 2019)                       |  |
| S163R | Uncertain significance(Last reviewed: Nov 9, 2020)                        |  |
| F164V | Uncertain significance(Last reviewed: Jan 6, 2017)                        |  |
| F164S | Uncertain significance(Last reviewed: Sep 22, 2019)                       |  |
| F164L | Uncertain significance(Last reviewed: Jan 6, 2021)                        |  |
| M165V | Uncertain significance(Last reviewed: Dec 27, 2017)                       |  |
| M165T | Uncertain significance(Last reviewed: Jul 20, 2020)                       |  |
| M165I | Uncertain significance(Last reviewed: Nov 29, 2018)                       |  |
| V166A | Uncertain significance(Last reviewed: Mar 30, 2018)                       |  |
| D167H | Uncertain significance(Last reviewed: Sep 22, 2019)                       |  |

|       |                                                                           |  |
|-------|---------------------------------------------------------------------------|--|
| D167G | Uncertain significance(Last reviewed: Mar 18, 2020)                       |  |
| D167A | Uncertain significance(Last reviewed: May 25, 2019)                       |  |
| R168G | Uncertain significance(Last reviewed: Mar 5, 2019)                        |  |
| V169A | Conflicting interpretations of pathogenicity(Last reviewed: Jul 1, 2021)  |  |
| V170I | Uncertain significance(Last reviewed: Jan 19, 2019)                       |  |
| D171A | Uncertain significance(Last reviewed: May 18, 2015)                       |  |
| D171E | Uncertain significance(Last reviewed: Oct 29, 2019)                       |  |
| L172F | Uncertain significance(Last reviewed: Aug 19, 2020)                       |  |
| L172V | Uncertain significance(Last reviewed: Sep 4, 2015)                        |  |
| L172P | Uncertain significance(Last reviewed: Dec 8, 2020)                        |  |
| T174A | Uncertain significance(Last reviewed: Aug 17, 2021)                       |  |
| T174I | Uncertain significance(Last reviewed: Jan 15, 2020)                       |  |
| A175S | Uncertain significance(Last reviewed: Dec 31, 2018)                       |  |
| A175T | Uncertain significance(Last reviewed: Mar 5, 2021)                        |  |
| C176R | Uncertain significance(Last reviewed: Oct 28, 2020)                       |  |
| I177V | Uncertain significance(Last reviewed: Jun 5, 2019)                        |  |
| Q178P | Uncertain significance(Last reviewed: Aug 25, 2011)                       |  |
| Q178R | Uncertain significance(Last reviewed: Dec 11, 2019)                       |  |
| Q178H | Uncertain significance(Last reviewed: Apr 27, 2018)                       |  |
| H179R | Uncertain significance(Last reviewed: Jan 18, 2021)                       |  |
| H179Q | Uncertain significance(Last reviewed: Oct 9, 2020)                        |  |
| L180R | Uncertain significance(Last reviewed: Oct 3, 2019)                        |  |
| Q181R | Uncertain significance(Last reviewed: Jul 4, 2019)                        |  |
| L182F | Uncertain significance(Last reviewed: Apr 3, 2019)                        |  |
| I183V | Uncertain significance(Last reviewed: Aug 31, 2020)                       |  |
| I183T | Uncertain significance(Last reviewed: Oct 13, 2020)                       |  |
| A184T | Uncertain significance(Last reviewed: Mar 18, 2020)                       |  |
| E185Q | Uncertain significance(Last reviewed: May 10, 2016)                       |  |
| E185G | Uncertain significance(Last reviewed: May 3, 2019)                        |  |
| K186Q | Uncertain significance(Last reviewed: Jan 31, 2019)                       |  |
| K186E | Uncertain significance(Last reviewed: Apr 5, 2018)                        |  |
| H187Q | Uncertain significance(Last reviewed: Oct 14, 2020)                       |  |
| K188M | Conflicting interpretations of pathogenicity(Last reviewed: Nov 16, 2020) |  |
| K188N | Uncertain significance(Last reviewed: Sep 10, 2020)                       |  |
| G189R | Uncertain significance(Last reviewed: Aug 27, 2019)                       |  |
| G189E | Uncertain significance(Last reviewed: Dec 27, 2019)                       |  |
| E190K | Uncertain significance(Last reviewed: Mar 29, 2020)                       |  |
| E191K | Uncertain significance(Last reviewed: Jul 23, 2018)                       |  |

|       |                                                                           |  |
|-------|---------------------------------------------------------------------------|--|
| H192Y | Uncertain significance(Last reviewed: Nov 16, 2018)                       |  |
| H192Q | Uncertain significance(Last reviewed: Jun 16, 2020)                       |  |
| R193Q | Conflicting interpretations of pathogenicity(Last reviewed: Oct 19, 2020) |  |
| A195T | Uncertain significance(Last reviewed: Sep 25, 2016)                       |  |
| E197K | Uncertain significance(Last reviewed: Oct 17, 2018)                       |  |
| D198G | Uncertain significance(Last reviewed: Jan 15, 2020)                       |  |
| T200A | Uncertain significance(Last reviewed: Nov 6, 2019)                        |  |
| L201V | Uncertain significance(Last reviewed: Dec 2, 2020)                        |  |
| L201P | Uncertain significance(Last reviewed: Mar 29, 2019)                       |  |
| D202G | Uncertain significance(Last reviewed: Nov 21, 2018)                       |  |
| D202E | Uncertain significance(Last reviewed: Jun 2, 2020)                        |  |
| N203D | Uncertain significance(Last reviewed: Oct 16, 2020)                       |  |
| I204V | Uncertain significance(Last reviewed: Oct 12, 2019)                       |  |
| S206P | Uncertain significance(Last reviewed: Sep 19, 2018)                       |  |
| H207R | Uncertain significance(Last reviewed: Jan 16, 2019)                       |  |
| H207Q | Uncertain significance(Last reviewed: Oct 29, 2020)                       |  |
| I208V | Uncertain significance(Last reviewed: Oct 5, 2020)                        |  |
| I208S | Uncertain significance(Last reviewed: Jun 17, 2020)                       |  |
| Y210C | Uncertain significance(Last reviewed: Jan 13, 2020)                       |  |
| F211L | Uncertain significance(Last reviewed: Nov 24, 2016)                       |  |
| R212G | Uncertain significance(Last reviewed: Jun 13, 2020)                       |  |
| R212C | Uncertain significance(Last reviewed: Oct 23, 2020)                       |  |
| R212S | Uncertain significance(Last reviewed: Jul 25, 2018)                       |  |
| R212L | Uncertain significance(Last reviewed: Jan 25, 2020)                       |  |
| R212H | Uncertain significance(Last reviewed: May 1, 2021)                        |  |
| R214C | Conflicting interpretations of pathogenicity(Last reviewed: Apr 28, 2021) |  |
| R214H | Conflicting interpretations of pathogenicity(Last reviewed: Dec 2, 2020)  |  |
| D215G | Uncertain significance(Last reviewed: Jun 23, 2020)                       |  |
| Y216C | Uncertain significance(Last reviewed: Nov 9, 2017)                        |  |
| T217A | Uncertain significance(Last reviewed: Apr 30, 2019)                       |  |
| T217S | Uncertain significance(Last reviewed: May 2, 2017)                        |  |
| E218G | Uncertain significance(Last reviewed: Jan 9, 2018)                        |  |
| L219S | Conflicting interpretations of pathogenicity(Last reviewed: Oct 23, 2020) |  |
| Q222H | Uncertain significance(Last reviewed: Apr 24, 2019)                       |  |
| V223I | Uncertain significance(Last reviewed: Apr 29, 2020)                       |  |
| Y224C | Uncertain significance(Last reviewed: Jul 7, 2014)                        |  |
| L225P | Uncertain significance(Last reviewed: Aug 2, 2019)                        |  |
| L226P | Uncertain significance(Last reviewed: Oct 9, 2020)                        |  |

|       |                                                                           |  |
|-------|---------------------------------------------------------------------------|--|
| P227S | Uncertain significance(Last reviewed: Jun 30, 2020)                       |  |
| P227L | Uncertain significance(Last reviewed: Apr 27, 2020)                       |  |
| D228V | Uncertain significance(Last reviewed: Jun 6, 2020)                        |  |
| D228G | Uncertain significance(Last reviewed: Oct 1, 2019)                        |  |
| F229L | Uncertain significance(Last reviewed: May 17, 2019)                       |  |
| L230F | Uncertain significance(Last reviewed: Oct 3, 2020)                        |  |
| S231L | Uncertain significance(Last reviewed: Aug 25, 2018)                       |  |
| E232D | Uncertain significance(Last reviewed: Nov 2, 2020)                        |  |
| H233Y | Uncertain significance(Last reviewed: Mar 10, 2020)                       |  |
| H233R | Uncertain significance(Last reviewed: Oct 5, 2020)                        |  |
| K235E | Uncertain significance(Last reviewed: Jul 7, 2017)                        |  |
| K235T | Uncertain significance(Last reviewed: Jan 25, 2021)                       |  |
| K235N | Conflicting interpretations of pathogenicity(Last reviewed: Jun 16, 2021) |  |
| V236D | Uncertain significance(Last reviewed: Nov 19, 2017)                       |  |
| R237P | Uncertain significance(Last reviewed: Jul 8, 2020)                        |  |
| R237Q | Uncertain significance(Last reviewed: Oct 26, 2020)                       |  |
| L238R | Uncertain significance(Last reviewed: Aug 25, 2020)                       |  |
| V239L | Uncertain significance(Last reviewed: Jun 13, 2018)                       |  |
| V239M | Uncertain significance(Last reviewed: Jul 18, 2016)                       |  |
| V239A | Uncertain significance(Last reviewed: Sep 30, 2019)                       |  |
| V239E | Uncertain significance(Last reviewed: Sep 9, 2019)                        |  |
| I240V | Uncertain significance(Last reviewed: Jan 21, 2017)                       |  |
| I240L | Uncertain significance(Last reviewed: Sep 2, 2020)                        |  |
| I240T | Uncertain significance(Last reviewed: Jan 25, 2021)                       |  |
| V241M | Uncertain significance(Last reviewed: Feb 12, 2021)                       |  |
| V241A | Uncertain significance(Last reviewed: Apr 18, 2020)                       |  |
| D242N | Uncertain significance(Last reviewed: Oct 9, 2020)                        |  |
| D242G | Uncertain significance(Last reviewed: Sep 12, 2019)                       |  |
| G243S | Uncertain significance(Last reviewed: Sep 18, 2019)                       |  |
| I244F | Uncertain significance(Last reviewed: Dec 7, 2018)                        |  |
| I244V | Uncertain significance(Last reviewed: Apr 1, 2021)                        |  |
| I244M | Uncertain significance(Last reviewed: Jun 28, 2019)                       |  |
| A245V | Uncertain significance(Last reviewed: Jul 3, 2019)                        |  |
| P247L | Uncertain significance(Last reviewed: Oct 9, 2020)                        |  |
| F248L | Uncertain significance(Last reviewed: May 23, 2015)                       |  |
| R249C | Uncertain significance(Last reviewed: May 25, 2020)                       |  |
| R249H | Uncertain significance(Last reviewed: Dec 11, 2020)                       |  |
| H250D | Uncertain significance(Last reviewed: Jul 30, 2019)                       |  |

|       |                                                                          |  |
|-------|--------------------------------------------------------------------------|--|
| H250Y | Uncertain significance(Last reviewed: Aug 27, 2020)                      |  |
| H250R | Uncertain significance(Last reviewed: Mar 24, 2020)                      |  |
| L252V | Uncertain significance(Last reviewed: Mar 9, 2015)                       |  |
| L252Q | Uncertain significance(Last reviewed: Nov 12, 2019)                      |  |
| D253G | Uncertain significance(Last reviewed: Dec 15, 2020)                      |  |
| D254Y | Uncertain significance(Last reviewed: Jul 2, 2018)                       |  |
| D254E | Uncertain significance(Last reviewed: Nov 29, 2018)                      |  |
| L255P | Uncertain significance(Last reviewed: Apr 3, 2019)                       |  |
| S256C | Uncertain significance(Last reviewed: Aug 14, 2020)                      |  |
| L257V | Uncertain significance(Last reviewed: Aug 26, 2020)                      |  |
| R258G | Uncertain significance(Last reviewed: Mar 13, 2017)                      |  |
| R258C | Uncertain significance(Last reviewed: Mar 25, 2021)                      |  |
| R258L | Uncertain significance(Last reviewed: Jan 11, 2019)                      |  |
| R258P | Uncertain significance(Last reviewed: Dec 20, 2019)                      |  |
| R258H | Pathogenic/Likely pathogenic(Last reviewed: Jul 13, 2021)                |  |
| T259S | Uncertain significance(Last reviewed: Aug 26, 2020)                      |  |
| R260W | Uncertain significance(Last reviewed: Oct 19, 2020)                      |  |
| R260Q | Uncertain significance(Last reviewed: Sep 17, 2020)                      |  |
| R260P | Uncertain significance(Last reviewed: Sep 24, 2020)                      |  |
| L261F | Uncertain significance(Last reviewed: Nov 29, 2018)                      |  |
| L262V | Uncertain significance(Last reviewed: Sep 3, 2021)                       |  |
| N263S | Uncertain significance(Last reviewed: Mar 4, 2019)                       |  |
| G264S | Conflicting interpretations of pathogenicity(Last reviewed: Dec 8, 2020) |  |
| G264V | Uncertain significance(Last reviewed: Oct 11, 2018)                      |  |
| L265I | Uncertain significance(Last reviewed: Sep 24, 2020)                      |  |
| L265V | Uncertain significance(Last reviewed: May 6, 2019)                       |  |
| L265P | Uncertain significance(Last reviewed: Jul 14, 2016)                      |  |
| A266D | Uncertain significance(Last reviewed: Aug 16, 2017)                      |  |
| Q267H | Uncertain significance(Last reviewed: Aug 30, 2019)                      |  |
| Q268K | Uncertain significance(Last reviewed: Sep 16, 2020)                      |  |
| Q268R | Uncertain significance(Last reviewed: Jan 21, 2019)                      |  |
| Q268H | Uncertain significance(Last reviewed: Apr 24, 2019)                      |  |
| M269V | Uncertain significance(Last reviewed: Jan 26, 2018)                      |  |
| M269L | Uncertain significance(Last reviewed: Oct 26, 2020)                      |  |
| I270V | Uncertain significance(Last reviewed: Mar 29, 2019)                      |  |
| I270M | Uncertain significance(Last reviewed: Mar 29, 2019)                      |  |
| S271G | Uncertain significance(Last reviewed: Jan 13, 2017)                      |  |
| S271N | Uncertain significance(Last reviewed: Jun 27, 2019)                      |  |

|       |                                                     |  |
|-------|-----------------------------------------------------|--|
| A273P | Uncertain significance(Last reviewed: Sep 8, 2019)  |  |
| A273E | Uncertain significance(Last reviewed: Mar 29, 2019) |  |
| A273V | Uncertain significance(Last reviewed: Jun 1, 2016)  |  |
| N274S | Uncertain significance(Last reviewed: Sep 4, 2019)  |  |
| N274K | Uncertain significance(Last reviewed: Jan 13, 2018) |  |
| N275D | Uncertain significance(Last reviewed: Aug 12, 2019) |  |
| H276N | Uncertain significance(Last reviewed: Apr 28, 2018) |  |
| H276Y | Uncertain significance(Last reviewed: Jun 2, 2020)  |  |
| H276P | Uncertain significance(Last reviewed: Sep 4, 2019)  |  |
| L278S | Uncertain significance(Last reviewed: Oct 19, 2016) |  |
| A279P | Uncertain significance(Last reviewed: Oct 1, 2020)  |  |
| A279G | Uncertain significance(Last reviewed: Jul 18, 2019) |  |
| V280I | Uncertain significance(Last reviewed: Oct 12, 2020) |  |
| I281V | Uncertain significance(Last reviewed: Jul 23, 2019) |  |
| T283S | Uncertain significance(Last reviewed: Nov 3, 2018)  |  |
| N284D | Uncertain significance(Last reviewed: Dec 11, 2019) |  |
| N284S | Uncertain significance(Last reviewed: May 17, 2018) |  |
| N284T | Uncertain significance(Last reviewed: Aug 17, 2016) |  |
| Q285R | Uncertain significance(Last reviewed: Feb 6, 2019)  |  |
| Q285H | Uncertain significance(Last reviewed: Nov 15, 2019) |  |
| M286V | Uncertain significance(Last reviewed: Mar 11, 2019) |  |
| M286I | Uncertain significance(Last reviewed: Sep 9, 2020)  |  |
| T287P | Uncertain significance(Last reviewed: Nov 21, 2019) |  |
| T287A | Benign/Likely benign(Last reviewed: Feb 1, 2021)    |  |
| T288A | Uncertain significance(Last reviewed: Mar 20, 2019) |  |
| I290F | Uncertain significance(Last reviewed: Nov 20, 2019) |  |
| I290T | Uncertain significance(Last reviewed: Sep 5, 2020)  |  |
| I290M | Uncertain significance(Last reviewed: Oct 21, 2019) |  |
| D291G | Uncertain significance(Last reviewed: Mar 29, 2019) |  |
| D291E | Uncertain significance(Last reviewed: Mar 26, 2020) |  |
| R292G | Uncertain significance(Last reviewed: Mar 29, 2020) |  |
| N293H | Uncertain significance(Last reviewed: Nov 29, 2018) |  |
| N293S | Uncertain significance(Last reviewed: Sep 2, 2019)  |  |
| A295S | Uncertain significance(Last reviewed: May 1, 2018)  |  |
| A295T | Uncertain significance(Last reviewed: Sep 9, 2020)  |  |
| A295G | Uncertain significance(Last reviewed: Jun 26, 2020) |  |
| L297R | Uncertain significance(Last reviewed: Nov 17, 2017) |  |
| L297P | Uncertain significance(Last reviewed: Sep 11, 2020) |  |

|       |                                                                           |  |
|-------|---------------------------------------------------------------------------|--|
| V298L | Uncertain significance(Last reviewed: Dec 4, 2019)                        |  |
| P299R | Uncertain significance(Last reviewed: Apr 3, 2019)                        |  |
| P299L | Uncertain significance(Last reviewed: Aug 31, 2018)                       |  |
| A300S | Uncertain significance(Last reviewed: Jun 17, 2020)                       |  |
| A300E | Uncertain significance(Last reviewed: Apr 12, 2018)                       |  |
| A300V | Uncertain significance(Last reviewed: Sep 17, 2020)                       |  |
| G302R | Conflicting interpretations of pathogenicity(Last reviewed: Sep 17, 2020) |  |
| G302V | Uncertain significance(Last reviewed: Sep 25, 2020)                       |  |
| E303D | Uncertain significance(Last reviewed: Sep 29, 2019)                       |  |
| S304I | Uncertain significance(Last reviewed: Aug 1, 2018)                        |  |
| S304R | Uncertain significance(Last reviewed: May 28, 2019)                       |  |
| G306R | Uncertain significance(Last reviewed: Sep 11, 2018)                       |  |
| H307Y | Uncertain significance(Last reviewed: Dec 11, 2018)                       |  |
| H307R | Uncertain significance(Last reviewed: Mar 13, 2019)                       |  |
| A308S | Uncertain significance(Last reviewed: Oct 30, 2020)                       |  |
| A308V | Uncertain significance(Last reviewed: May 21, 2015)                       |  |
| A308G | Uncertain significance(Last reviewed: Apr 28, 2021)                       |  |
| T310A | Uncertain significance(Last reviewed: Nov 23, 2020)                       |  |
| T310I | Uncertain significance(Last reviewed: Dec 26, 2019)                       |  |
| I311V | Uncertain significance(Last reviewed: May 30, 2019)                       |  |
| I311T | Uncertain significance(Last reviewed: Dec 21, 2014)                       |  |
| R312G | Uncertain significance(Last reviewed: Jun 7, 2020)                        |  |
| R312W | Conflicting interpretations of pathogenicity(Last reviewed: May 6, 2021)  |  |
| R312Q | Uncertain significance(Last reviewed: Jul 20, 2020)                       |  |
| H316Y | Uncertain significance(Last reviewed: Sep 15, 2015)                       |  |
| D318Y | Uncertain significance(Last reviewed: Mar 15, 2018)                       |  |
| D318N | Uncertain significance(Last reviewed: Oct 20, 2019)                       |  |
| D318H | Uncertain significance(Last reviewed: Feb 14, 2019)                       |  |
| R319Q | Conflicting interpretations of pathogenicity(Last reviewed: Oct 6, 2020)  |  |
| R319P | Uncertain significance(Last reviewed: Sep 17, 2014)                       |  |
| K320E | Uncertain significance(Last reviewed: Feb 15, 2019)                       |  |
| K320R | Uncertain significance(Last reviewed: Feb 10, 2014)                       |  |
| K320N | Uncertain significance(Last reviewed: Feb 26, 2021)                       |  |
| Q321R | Uncertain significance(Last reviewed: Apr 28, 2020)                       |  |
| R322K | Uncertain significance(Last reviewed: Dec 3, 2019)                        |  |
| R322T | Uncertain significance(Last reviewed: Sep 25, 2019)                       |  |
| R322S | Uncertain significance(Last reviewed: Apr 24, 2019)                       |  |
| L323W | Uncertain significance(Last reviewed: Jul 23, 2020)                       |  |



|       |                                                                          |  |
|-------|--------------------------------------------------------------------------|--|
| A324T | Uncertain significance(Last reviewed: Sep 26, 2019)                      |  |
| T325A | Uncertain significance(Last reviewed: Sep 23, 2019)                      |  |
| L326W | Uncertain significance(Last reviewed: Oct 2, 2019)                       |  |
| L326S | Uncertain significance(Last reviewed: Jan 11, 2019)                      |  |
| L326F | Uncertain significance(Last reviewed: Apr 3, 2019)                       |  |
| Y327C | Uncertain significance(Last reviewed: Jun 15, 2018)                      |  |
| K328E | Uncertain significance(Last reviewed: Sep 13, 2019)                      |  |
| S329L | Uncertain significance(Last reviewed: Nov 17, 2019)                      |  |
| P330S | Uncertain significance(Last reviewed: Jul 14, 2020)                      |  |
| P330R | Uncertain significance(Last reviewed: Jul 8, 2020)                       |  |
| P330L | Uncertain significance(Last reviewed: Aug 23, 2020)                      |  |
| S331I | Uncertain significance(Last reviewed: Sep 2, 2014)                       |  |
| S331R | Uncertain significance(Last reviewed: Jan 12, 2019)                      |  |
| Q332K | Uncertain significance(Last reviewed: Jan 19, 2018)                      |  |
| K333N | Uncertain significance(Last reviewed: Oct 29, 2020)                      |  |
| E334K | Uncertain significance(Last reviewed: Jan 22, 2018)                      |  |
| C335Y | Uncertain significance(Last reviewed: Feb 20, 2019)                      |  |
| T336A | Uncertain significance(Last reviewed: Nov 2, 2018)                       |  |
| T336P | Uncertain significance(Last reviewed: Nov 23, 2020)                      |  |
| V337I | Uncertain significance(Last reviewed: Dec 6, 2018)                       |  |
| F339S | Uncertain significance(Last reviewed: Oct 6, 2020)                       |  |
| I341V | Uncertain significance(Last reviewed: Mar 25, 2019)                      |  |
| P343S | Uncertain significance(Last reviewed: Jan 23, 2020)                      |  |
| P343R | Uncertain significance(Last reviewed: Jan 1, 2016)                       |  |
| P343L | Uncertain significance(Last reviewed: Dec 12, 2019)                      |  |
| Q344H | Uncertain significance(Last reviewed: Nov 1, 2020)                       |  |
| F346S | Uncertain significance(Last reviewed: May 29, 2020)                      |  |
| D348Y | Uncertain significance(Last reviewed: Jun 20, 2017)                      |  |
| D348V | Uncertain significance(Last reviewed: Oct 5, 2020)                       |  |
| D348E | Uncertain significance(Last reviewed: Oct 16, 2020)                      |  |
| T349A | Conflicting interpretations of pathogenicity(Last reviewed: Jul 9, 2019) |  |
| T349I | Uncertain significance(Last reviewed: May 21, 2018)                      |  |
| V350I | Uncertain significance(Last reviewed: Aug 14, 2020)                      |  |
| V350F | Uncertain significance(Last reviewed: Sep 30, 2020)                      |  |
| V351I | Uncertain significance(Last reviewed: Jul 25, 2020)                      |  |
| T352N | Uncertain significance(Last reviewed: Sep 24, 2020)                      |  |
| A354T | Uncertain significance(Last reviewed: Jun 13, 2020)                      |  |
| A354V | Uncertain significance(Last reviewed: Oct 25, 2020)                      |  |

|       |                                                                           |  |
|-------|---------------------------------------------------------------------------|--|
| C355R | Uncertain significance(Last reviewed: Jun 1, 2020)                        |  |
| C355Y | Uncertain significance(Last reviewed: Jun 15, 2020)                       |  |
| S356L | Uncertain significance(Last reviewed: Mar 7, 2019)                        |  |
| Q358E | Uncertain significance(Last reviewed: Oct 9, 2020)                        |  |
| Q358L | Uncertain significance(Last reviewed: Sep 5, 2018)                        |  |
| Q358R | Uncertain significance(Last reviewed: May 14, 2019)                       |  |
| S362F | Uncertain significance(Last reviewed: Jul 19, 2019)                       |  |
| S364R | Uncertain significance(Last reviewed: Dec 5, 2019)                        |  |
| S364G | Conflicting interpretations of pathogenicity(Last reviewed: Sep 21, 2020) |  |
| T365P | Uncertain significance(Last reviewed: Dec 21, 2016)                       |  |
| T365S | Conflicting interpretations of pathogenicity(Last reviewed: Jun 26, 2019) |  |
| T365I | Uncertain significance(Last reviewed: Feb 23, 2017)                       |  |
| R366W | Uncertain significance(Last reviewed: Oct 15, 2020)                       |  |
| R366P | Uncertain significance(Last reviewed: Sep 11, 2020)                       |  |
| R366Q | Uncertain significance(Last reviewed: Oct 1, 2020)                        |  |
| K367Q | Uncertain significance(Last reviewed: Nov 5, 2018)                        |  |
| R368W | Uncertain significance(Last reviewed: May 19, 2021)                       |  |
| R368Q | Uncertain significance(Last reviewed: Nov 18, 2020)                       |  |
| S369L | Uncertain significance(Last reviewed: Jul 12, 2020)                       |  |
| R370Q | Uncertain significance(Last reviewed: May 14, 2021)                       |  |
| D371E | Uncertain significance(Last reviewed: Nov 13, 2018)                       |  |
| E373K | Uncertain significance(Last reviewed: May 6, 2020)                        |  |
| E373A | Uncertain significance(Last reviewed: Sep 13, 2019)                       |  |
| E374K | Uncertain significance(Last reviewed: Aug 15, 2018)                       |  |
| E375K | Uncertain significance(Last reviewed: Mar 18, 2019)                       |  |
| L376I | Uncertain significance(Last reviewed: Aug 21, 2020)                       |  |

**Supplementary Table S1.** RAD51C missense variants reported in ClinVar as of October 2021 ([ncbi.nlm.nih.gov/clinvar](https://ncbi.nlm.nih.gov/clinvar)), obtained mostly through clinical sequencing. All variants are germline in origin. Two of the variants are considered to be benign/likely benign and 7 pathogenic/likely pathogenic. Most of the rest of the nearly 600 variants are considered to be of uncertain significance, although 19 have conflicting interpretations of pathogenicity. All reported variants are germline.

Supplemental Table S2. RAD51C cancer variants.

| Variant | Cancer Type      | Allele origin | Source            | ClinVar |
|---------|------------------|---------------|-------------------|---------|
| M1T     | KIRC             | somatic       | MSK               |         |
| R2C     | READ             | somatic       | MSK               |         |
| G3R     | EOC, BRCA        | germline      | (1,2)             | ClinVar |
| T5M     | BRCA             | somatic       | MSK, COSMIC, (2)  | ClinVar |
| F6S     | UCEC             | somatic       | MSK               |         |
| F6L     | LUAD             | somatic       | MSK,              | ClinVar |
| R7C     | COAD,<br>LUAD    | somatic       | MSK, COSMIC       | ClinVar |
| F8L     | OS               | somatic       | (3)               | ClinVar |
| E9D     | COAD             | somatic       | COSMIC, TCGA      |         |
| Q11H    | EHCC             | somatic       | MSK               |         |
| Q11R    | EOC              | germline      | (2)               | ClinVar |
| R12Q    | CESC             | somatic       | MSK, COSMIC       | ClinVar |
| D13N    | UCEC,<br>ALL/LBL | somatic       | MSK, COSMIC, (4)  | ClinVar |
| V15M    | UCEC             | somatic       | TCGA              |         |
| S16N    | THYM             | somatic       | TCGA              | ClinVar |
| P18R    | HNSC             | somatic       | TCGA              | ClinVar |
| P18S    | SCC              | somatic       | COSMIC            | ClinVar |
| P21A    | BRCA, LUAD       | somatic       | MSK, COSMIC, TCGA | ClinVar |
| P21S    | BRCA, LUAD       | somatic       | MSK, COSMIC, TCGA | ClinVar |
| P21T    | COAD,<br>BLCA    | somatic       | MSK, COSMIC, TCGA |         |
| A22T    | PAAD             | somatic       | MSK               |         |
| V23L    | LUAD             | somatic       | MSK               |         |
| R24L    | LUSC             | somatic       | TCGA              | ClinVar |
| R24P    | PRAD             | somatic       | MSK               |         |
| K26M    | EOC              | germline      | (2)               | ClinVar |
| K26N    | LUSC             | somatic       | TCGA              |         |
| L27V    | LUAD             | somatic       | MSK               |         |
| L27P    | EOC              | germline      | (2)               | ClinVar |
| S29F    | USC              | somatic       | MSK               | ClinVar |
| S29P    | LUAD             | somatic       | MSK, COSMIC       |         |
| A30E    | BRCA             | germline      | (5,6)             |         |
| Q33H    | UCEC             | somatic       | MSK               | ClinVar |
| E36D    | NOS              | somatic       | MSK               |         |
| E36K    | BRCA             | germline      | (5,6)             | ClinVar |
| E37K    | MCC              | somatic       | MSK               |         |
| V41M    | COAD             | somatic       | MSK               | ClinVar |
| P43L    | SKCM, MPM        | somatic       | MSK, COSMIC       | ClinVar |
| P43S    | EOC              | germline      | (2)               | ClinVar |
| S44C    | BRCA             | somatic       | MSK               |         |
| E45D    | EHCC, CHOL       | somatic       | COSMIC            | ClinVar |
| E45G    | BRCA             | germline      | MSK, (5,6)        | ClinVar |
| G51V    | LUAD             | somatic       | COSMIC            | ClinVar |
| I52L    | UCEC             | somatic       | TCGA              | ClinVar |

|       |                  |                      |                   |         |
|-------|------------------|----------------------|-------------------|---------|
| S53C  | SCC              | somatic              | COSMIC            | ClinVar |
| A57V  | GBM              | somatic              | (7)               |         |
| E59K  | CESC, GBM        | somatic              | MSK, COSMIC, TCGA |         |
| I63S  | LUAD             | somatic              | TCGA              |         |
| E67G  | BRCA             | germline             | (8)               | ClinVar |
| E67K  | EOC              | germline             | (2)               |         |
| C68F  | LUAD             | somatic              | MSK, COSMIC       |         |
| N71D  | UCEC             | somatic              | TCGA              |         |
| N71K  | EOC              | germline             | (2)               |         |
| R74K  | BRCA             | somatic              | MSK, TCGA         |         |
| Y75C  | NEC              | somatic              | MSK               | ClinVar |
| G77D  | ALL/LBL,<br>SKCM | somatic              | MSK, COSMIC       | ClinVar |
| E80K  | BRCA             | somatic              | MSK, TCGA         |         |
| E80Q  | BLCA, SCC        | somatic              | MSK, TCGA, COSMIC |         |
| H82N  | EOC              | germline             | (2)               |         |
| K83N  | COAD,<br>READ    | somatic              | MSK, COSMIC       | ClinVar |
| K84M  | SCC              | somatic              | TCGA              |         |
| K84R  | COAD             | somatic              | COSMIC            |         |
| K84N  | EOC, COAD        | germline,<br>somatic | (2), COSMIC       | ClinVar |
| A87S  | GBM              | somatic              | (4)               | ClinVar |
| A87T  | COAD             | somatic              | COSMIC            | ClinVar |
| E89K  | BLCA             | somatic              | MSK               | ClinVar |
| L91F  | EOC              | germline             | (2)               | ClinVar |
| E92D  | BRCA             | somatic              | MSK               |         |
| E92K  | PAAD             | somatic              | TCGA              | ClinVar |
| E94G  | NOS              | somatic              | MSK               |         |
| T96S  | LUAD             | somatic              | MSK               | ClinVar |
| Q97H  | UCEC             | somatic              | MSK               |         |
| G98S  | COAD,<br>READ    | somatic              | MSK, COSMIC       |         |
| T102I | MCC              | somatic              | MSK               | ClinVar |
| F103V | BRCA             | germline             | (9)               | ClinVar |
| S105L | LUAD             | somatic              | MSK, COSMIC       |         |
| A106T | COAD             | somatic              | MSK               |         |
| L107P | THCA             | somatic              | COSMIC            |         |
| D108N | GBM              | somatic              | TCGA              |         |
| D108Y | COAD,<br>READ    | somatic              | MSK, COSMIC       |         |
| L111P | NB               | somatic              | MSK               |         |
| G112A | OS               | somatic              | (4,10)            | ClinVar |
| G112R | SKCM             | somatic              | COSMIC            |         |
| G112V | EOC              | germline             | (2)               | ClinVar |
| G113S | BRCA             | somatic              | COSMIC, TCGA, MSK |         |
| M118I | BRCA, SCC        | somatic              | TCGA, COSMIC      | ClinVar |
| T120I | UCEC             | somatic              | MSK               |         |
| T120A | EOC              | germline             | (2)               |         |

|       |            |          |                                   |         |
|-------|------------|----------|-----------------------------------|---------|
| T121R | EOC        | somatic  | This study                        |         |
| G125V | BRCA       | germline | (1)                               | ClinVar |
| A126T | EOC, BRCA  | germline | MSK, COSMIC,<br>(1,2,5,6,9,11-14) | ClinVar |
| P127Q | ALL/LBL    | somatic  | (10,15)                           |         |
| G130A | BRCA       | somatic  | MSK                               | ClinVar |
| T132P | EOC        | germline | (2,14,16)                         | ClinVar |
| Q133K | EOC        | germline | This study (2,14)                 | ClinVar |
| L134S | MCT        | somatic  | (10)                              | ClinVar |
| C135R | BRCA       | germline | (6,8)                             |         |
| C135Y | EOC, BRCA  | germline | (6,9)                             |         |
| M136I | LUAD, EOC  | somatic  | MSK, (2)                          | ClinVar |
| M136L | LUAD       | germline | COSMIC                            | ClinVar |
| L138F | EOC, BRCA  | germline | (1,6)                             | ClinVar |
| A139T | RCC        | somatic  | MSK                               | ClinVar |
| V140G | EOC        | germline | (2)                               |         |
| D141N | BLCA       | somatic  | MSK                               | ClinVar |
| D141H | BRCA       | unknown  | TCGA                              |         |
| Q143R | BRCA       | germline | (2,5,6)                           | ClinVar |
| I144M | UPS/SCS    | somatic  | MSK                               | ClinVar |
| I144T | EOC        | germline | (2)                               | ClinVar |
| G149R | BLCA       | somatic  | MSK                               |         |
| G150A | LUAD       | somatic  | MSK                               |         |
| V151G | LMS        | somatic  | MSK                               |         |
| V151M | AOD, GBM   | somatic  | MSK, COSMIC                       | ClinVar |
| A152T | RMS, MMT   | somatic  | COSMIC                            | ClinVar |
| G153D | BRCA       | germline | (11,12)                           | ClinVar |
| G153S | HCC        | somatic  | COSMIC                            |         |
| A155T | SKCM       | somatic  | MSK, COSMIC                       | ClinVar |
| A155V | ACC        | somatic  | TCGA                              |         |
| F157C | UCEC, ESCA | somatic  | MSK                               | ClinVar |
| I158F | MB         | somatic  | (17)                              |         |
| D159N | BRCA       | germline | (1)                               | ClinVar |
| T160A | COAD       | somatic  | MSK                               |         |
| E161D | LUAD       | somatic  | MSK, COSMIC                       | ClinVar |
| G162A | EOC        | somatic  | MSK                               |         |
| G162E | EOC, BRCA  | germline | MSK, (2)                          | ClinVar |
| G162R | SKCM       | somatic  | MSK, TCGA, COSMIC                 |         |
| S163R | STAD       | somatic  | MSK, COSMIC                       | ClinVar |
| M165L | EOC        | germline | (2)                               |         |
| V166G | EOC        | germline | (2)                               |         |
| D167N | BLCA, PRAD | somatic  | COSMIC, TCGA                      |         |
| D167Y | THCA       | somatic  | MSK                               |         |
| R168K | BLCA       | somatic  | MSK, COSMIC                       |         |
| V169A | EOC, BRCA  | germline | (1,2)                             | ClinVar |
| V170G | EOC        | germline | (2)                               |         |
| V170I | COAD       | somatic  | MSK, COSMIC                       | ClinVar |
| D171H | HCC        | somatic  | COSMIC                            |         |
| L172V | CESC       | somatic  | TCGA                              | ClinVar |

|       |                     |           |                                  |         |
|-------|---------------------|-----------|----------------------------------|---------|
| L172I | COAD                | somatic   | COSMIC                           |         |
| T174S | EOC                 | germline  | (2)                              |         |
| A175T | SCC                 | somatic   | COSMIC                           | ClinVar |
| A175V | COAD                | somatic   | MSK                              |         |
| Q178E | EOC, BLCA           | somatic   | MSK, COSMIC                      |         |
| H179Y | UCEC                | somatic   | MSK                              |         |
| Q181R | EOC                 | germline  | MSK                              | ClinVar |
| L182R | EOC                 | somatic   | MSK                              |         |
| I183L | MPM                 | somatic   | MSK                              |         |
| A184E | NEC                 | somatic   | MSK                              |         |
| K188N | BRCA                | germline  | (8)                              | ClinVar |
| G189R | EOC                 | germline  | (2)                              | ClinVar |
| G189V | SCC                 | somatic   | MSK                              |         |
| E190G | LUAD,<br>NSCLC      | somatic   | MSK                              |         |
| R193L | EOC                 | Reversion | (18)                             |         |
| R193Q | UCEC,<br>NSCLC      | somatic   | MSK, TCGA                        | ClinVar |
| R193W | EOC                 | Reversion | (18)                             |         |
| K194R | HNSC                | somatic   | MSK                              |         |
| E197D | GBM                 | somatic   | TCGA                             |         |
| L201F | BLCA                | somatic   | MSK, COSMIC                      |         |
| L201V | BLCA                | somatic   | MSK                              | ClinVar |
| D202V | SKCM                | somatic   | MSK, COSMIC                      |         |
| N203I | BLCA                | somatic   | MSK                              |         |
| N203D | EOC                 | germline  | (2)                              | ClinVar |
| I204V | BLCA                | somatic   | MSK                              | ClinVar |
| L205P | MCT                 | somatic   | (10)                             |         |
| L205V | COAD,<br>READ       | somatic   | MSK                              |         |
| L205F | BRCA,<br>LUSC, SKCM | somatic   | MSK, TCGA, COSMIC                |         |
| H207Y | LUAD                | somatic   | MSK                              |         |
| H207D | BRCA                | somatic   | MSK                              |         |
| H207R | EOC                 | germline  | (2)                              | ClinVar |
| I208V | NSCLC               | somatic   | MSK                              | ClinVar |
| Y209C | LUAD                | somatic   | MSK, COSMIC                      |         |
| R212H | COAD                | somatic   | MSK, COSMIC                      | ClinVar |
| R212C | UCEC, LUAD          | somatic   | MSK                              | ClinVar |
| C213Y | CHOL                | somatic   | MSK                              |         |
| R214H | ESCA                | somatic   | MSK, COSMIC                      | ClinVar |
| R214C | COAD                | somatic   | This study, MSK,<br>COSMIC, (11) | ClinVar |
| E218K | UCEC                | somatic   | MSK                              |         |
| E218D | UCEC                | somatic   | MSK                              |         |
| L219S | EOC, BRCA           | germline  | (6,12)                           | ClinVar |
| Q222R | UCEC                | somatic   | MSK                              |         |
| V223A | UCEC                | somatic   | TCGA                             |         |
| Y224H | BLCA                | somatic   | MSK, TCGA                        |         |

|       |                                 |                      |                              |         |
|-------|---------------------------------|----------------------|------------------------------|---------|
| L226F | BLCA                            | somatic              | MSK                          |         |
| L226P | EOC                             | germline             | (2)                          | ClinVar |
| P227L | SKCM                            | somatic              | MSK                          | ClinVar |
| D228H | THCA                            | somatic              | MSK                          |         |
| D228Y | LUAD                            | somatic              | MSK                          |         |
| F229L | MCT                             | somatic              | (10)                         | ClinVar |
| L230F | BRCA,<br>SKCM                   | somatic              | MSK, COSMIC                  | ClinVar |
| S231L | BRCA, LUAD                      | somatic              | MSK, TCGA                    | ClinVar |
| H233Q | SKCM,<br>HNSC, PAAD             | somatic              | MSK                          |         |
| K235N | BRCA                            | somatic              | MSK                          | ClinVar |
| K235Q | UCEC                            | somatic              | MSK, COSMIC                  |         |
| R237L | LUAD                            | somatic              | MSK                          |         |
| P247L | SKCM                            | somatic              | MSK, COSMIC                  | ClinVar |
| R249C | BRCA,<br>SKCM, DA               | somatic              | MSK, COSMIC, TCGA,<br>(13)   | ClinVar |
| R249H | EOC, LUSC,<br>KIRC              | germline             | COSMIC, (2)                  | ClinVar |
| R249S | GBM                             | somatic              | MSK                          |         |
| H250Y | GBM                             | somatic              | Mayo Clinic                  | ClinVar |
| D251G | PAAD                            | somatic              | MSK                          |         |
| D253N | NOS                             | germline             | (19)                         |         |
| L257V | HCC                             | somatic              | COSMIC                       | ClinVar |
| R258H | COAD, GBM,<br>PRAD              | germline,<br>somatic | MSK, COSMIC, (20)            | ClinVar |
| R260Q | UCEC                            | somatic              | MSK                          | ClinVar |
| R260W | PRAD                            | somatic              | MSK                          | ClinVar |
| L262V | EOC, PRAD                       | germline             | COSMIC, (2,14)               | ClinVar |
| G264D | COAD                            | somatic              | MSK, (10)                    |         |
| G264S | EOC, BRCA,<br>Teratoma,<br>PRAD | germline,<br>somatic | MSK, COSMIC, (1,2)           | ClinVar |
| G264V | BRCA                            | germline             | (1)                          | ClinVar |
| A266T | UCEC                            | somatic              | MSK                          |         |
| N275S | PRAD                            | somatic              | MSK                          |         |
| R277T | LUAD                            | somatic              | MSK                          |         |
| A279D | UCEC                            | somatic              | TCGA                         |         |
| A279P | EOC, ESCA                       | somatic              | MSK, (2)                     | ClinVar |
| A279V | UCEC                            | somatic              | COSMIC                       |         |
| T283A | MCT                             | somatic              | (10)                         |         |
| T283I | MCT                             | somatic              | (10)                         |         |
| T287A | EOC, BRCA,<br>PRAD              | germline             | COSMIC,<br>(1,2,5,6,9,11-14) | ClinVar |
| K289N | LUAD                            | somatic              | MSK                          |         |
| I290T | BRCA                            | germline             | (5,6)                        | ClinVar |
| D291Y | COAD                            | somatic              | MSK, COSMIC                  |         |



|       |                      |                   |                                    |         |
|-------|----------------------|-------------------|------------------------------------|---------|
| D291V | EOC, HCC, LUAD, COAD | germline, somatic | MSK, (2)                           |         |
| R292K | AOD                  | somatic           | MSK, COSMIC                        |         |
| A295G | MCT                  | somatic           | (10)                               | ClinVar |
| A295T | UCEC                 | somatic           | MSK                                | ClinVar |
| A295V | SKCM                 | somatic           | MSK                                |         |
| L297I | NOS                  | somatic           | MSK                                |         |
| L297R | GBM                  | somatic           | MSK                                | ClinVar |
| P299S | BCC                  | somatic           | MSK                                |         |
| G302E | SKCM                 | somatic           | MSK                                |         |
| W305L | THCA                 | somatic           | TCGA                               |         |
| R312L | SKCM                 | somatic           | TCGA                               |         |
| R312Q | GBM                  | somatic           | MSK                                | ClinVar |
| R312W | EOC, COAD            | somatic, germline | This Study, MSK, COSMIC, TCGA (21) | ClinVar |
| H316N | COAD                 | somatic           | MSK                                |         |
| H316Y | BRCA                 | somatic           | MSK, COSMIC                        | ClinVar |
| D318Y | LUAD                 | somatic           | MSK                                | ClinVar |
| D318E | BRCA                 | somatic           | MSK                                |         |
| D318N | EOC                  | germline          | (2)                                | ClinVar |
| R319L | HCC                  | somatic           | COSMIC                             |         |
| R319Q | EOC, COAD, UCEC      | somatic, germline | MSK, COSMIC, (2)                   | ClinVar |
| K320M | LUAD                 | somatic           | COSMIC                             |         |
| A324T | COAD                 | somatic           | TCGA                               | ClinVar |
| A324V | UCEC                 | somatic           | MSK                                |         |
| S329L | LUSC                 | somatic           | MSK                                | ClinVar |
| P330H | BLCA                 | somatic           | COSMIC                             |         |
| P330S | SKCM                 | somatic           | MSK, COSMIC                        | ClinVar |
| S331N | MCT                  | somatic           | (10)                               |         |
| Q332P | SCC                  | somatic           | MSK                                |         |
| T336P | EOC                  | germline          | (2)                                | ClinVar |
| V337L | SCLC                 | somatic           | MSK                                |         |
| F339L | BLCA                 | somatic           | MSK                                |         |
| Q340E | GBM                  | somatic           | TCGA                               |         |
| Q340K | SCC                  | somatic           | COSMIC                             |         |
| I341M | BRCA                 | somatic           | MSK, TCGA                          |         |
| P343S | UCEC                 | somatic           | MSK                                | ClinVar |
| Q344E | BLCA                 | somatic           | (22)                               |         |
| G345R | GBM, SKCM            | somatic           | MSK, TCGA                          |         |
| R347K | UCEC                 | somatic           | TCGA                               |         |
| D348V | ULE                  | germline          | MSK                                | ClinVar |
| D348Y | UCEC                 | somatic           | MSK                                | ClinVar |
| T349A | BRCA, COAD           | somatic           | MSK, TCGA                          | ClinVar |
| V350I | STAD                 | somatic           | TCGA                               | ClinVar |
| T352S | NOS                  | somatic           | MSK                                |         |
| S353T | BRCA                 | somatic           | MSK                                |         |

|              |                        |          |                    |         |
|--------------|------------------------|----------|--------------------|---------|
| <b>A354T</b> | <b>COAD</b>            | somatic  | MSK, COSMIC        | ClinVar |
| <b>A354V</b> | <b>EOC</b>             | germline | (2)                | ClinVar |
| <b>S356L</b> | <b>BLCA</b>            | somatic  | MSK                | ClinVar |
| <b>L357S</b> | <b>UCEC</b>            | somatic  | TCGA               |         |
| <b>Q358K</b> | <b>CHOL</b>            | somatic  | MSK                |         |
| <b>E360A</b> | <b>LUAD</b>            | somatic  | MSK                |         |
| <b>E360Q</b> | <b>BRCA</b>            | somatic  | <b>COSMIC</b>      |         |
| <b>S362F</b> | <b>SKCM, BCC</b>       | somatic  | MSK                | ClinVar |
| <b>L363M</b> | <b>SKCM</b>            | somatic  | MSK                |         |
| <b>S364G</b> | <b>EOC</b>             | germline | (2)                | ClinVar |
| <b>T365N</b> | <b>SCC</b>             | somatic  | COSMIC             |         |
| <b>R366Q</b> | <b>EOC, BRCA, SKCM</b> | germline | COSMIC, (1)        | ClinVar |
| <b>R366W</b> | <b>NOS</b>             | germline | (19)               | ClinVar |
| <b>R368Q</b> | <b>ECUC, HCC, COAD</b> | somatic  | <b>MSK, COSMIC</b> | ClinVar |
| <b>R368W</b> | <b>COAD, MCC, SKCM</b> | somatic  | MSK, COSMIC        | ClinVar |
| <b>S369P</b> | <b>COAD</b>            | somatic  | MSK                |         |
| <b>R370Q</b> | <b>UCEC, MDS</b>       | somatic  | MSK                | ClinVar |
| <b>D371Y</b> | <b>UCEC</b>            | somatic  | MSK                |         |
| <b>P372S</b> | <b>GBM</b>             | somatic  | Mayo Clinic        |         |
| <b>E374K</b> | <b>SKCM</b>            | somatic  | COSMIC             | ClinVar |
| <b>E375K</b> | <b>GBM</b>             | somatic  | MSK                | ClinVar |

**Supplementary Table S2.** RAD51C cancer variants identified from the following sources: Memorial Sloan Kettering Cancer Center (MSK), Catalogue of Somatic Mutations in Cancer (COSMIC), The Cancer Genome Atlas (TCGA), the indicated references (see **Fig. 1**), and patients in this study. Variants found in breast or ovarian tumors are colored pink; Variants found in other cancer types are colored black. Those variants also reported in ClinVar are indicated.

MSK clinical sequencing through MSK-IMPACT and related platforms is performed by the MSK Molecular Diagnostics Service and the Marie-Josée and Henry R. Kravis Center for Molecular Oncology in the Department of Pathology. MSK-IMPACT (Integrated Mutation Profiling of Actionable Cancer Targets) is a targeted tumor-sequencing test available to MSK patients. It currently analyzes 505 genes, although earlier versions involved analysis smaller number (~400). For 99% of cases, a matched normal is sequenced and used in the mutation calling to infer which mutations are somatic. The vast majority of MSK-IMPACT mutations are somatic variants. Germline mutations are reported for patients that have consented; however, it is limited to a subset of genes, and, with a few exceptions, only known or likely pathogenic variants are reported. TCGA involved sequencing of primary cancer samples and matched

normal and also evolved during the effort but analyzed a much larger set of genes. COSMIC contains somatic mutation from TGCA and other sources.

**Cancer abbreviations:**

|        |                                                                  |
|--------|------------------------------------------------------------------|
| AA     | Astrocytoma                                                      |
| ACC    | Adrenocortical Carcinoma                                         |
| ALL/LB | T-Lymphoblastic Leukemia/Lymphoma                                |
| AOD    | Anaplastic Oligodendroglioma                                     |
| BCC    | Basal Cell Carcinoma                                             |
| BLCA   | Bladder Urothelial Carcinoma                                     |
| BRCA   | Breast invasive carcinoma/Breast cancer                          |
| CESC   | Cervical squamous cell carcinoma and endocervical adenocarcinoma |
| CHOL   | Cholangiocarcinoma                                               |
| COAD   | Colon Adenocarcinoma                                             |
| DA     | Duodenal Adenocarcinoma                                          |
| EHCC   | Extrahepatic Cholangiocarcinoma                                  |
| EOC    | Epithelial Ovarian Carcinoma                                     |
| ESCA   | Esophageal carcinoma                                             |
| GBC    | Gallbladder Cancer                                               |
| GBM    | Glioblastoma multiforme                                          |
| HCC    | Hepatocellular Carcinoma/Liver Cancer                            |
| HNSC   | Head and Neck Squamous Cell Carcinoma                            |
| KIRC   | Kidney renal clear cell carcinoma                                |
| LMS    | Leiomyosarcoma                                                   |
| LUAD   | Lung adenocarcinoma                                              |
| LUSC   | Lung Squamous Cell Carcinoma                                     |
| MB     | Medulloblastoma                                                  |
| MCC    | Merkel Cell Carcinoma                                            |
| MCT    | Mixed Cancer Types                                               |
| MDS    | Myelodysplastic Syndromes                                        |
| MMMT   | Uterine Malignant Mixed Mullerian Tumor                          |
| MPM    | Malignant Pleural Mesothelioma                                   |
| NB     | Neuroblastoma                                                    |
| NEC    | Neuroendocrine cancer/Islet cell carcinoma                       |
| NOS    | Not Otherwise Described                                          |
| NSCLC  | Non-small-cell lung carcinoma                                    |
| OS     | Osteosarcoma                                                     |
| PAAD   | Pancreatic Adenocarcinoma                                        |
| PRAD   | Prostate Adenocarcinoma                                          |
| RCC    | Renal Cell Carcinoma                                             |
| READ   | Rectum adenocarcinoma                                            |
| RMS    | Rhabdomyosarcoma                                                 |
| SCC    | Squamous Cell Carcinoma                                          |
| SCLC   | Small Cell Lung Cancer                                           |
| SCS    | Spindle Cell Sarcoma                                             |
| SKCM   | Skin Cutaneous Melanoma, Melanoma                                |
| STAD   | Stomach adenocarcinoma                                           |
| THCA   | Thyroid carcinoma                                                |
| THYM   | Thymoma                                                          |
| UCEC   | Uterine (Corpus) Endometrial Carcinoma                           |
| UPS    | Undifferentiated Pleomorphic Sarcoma                             |

USC            Uterine Carcinosarcoma  
ULE            Uterine Leiomyoma

## References:

1. Meindl A, Hellebrand H, Wiek C, Erven V, Wappenschmidt B, Niederacher D, *et al.* Germline mutations in breast and ovarian cancer pedigrees establish RAD51C as a human cancer susceptibility gene. *Nat Genet* **2010**;42(5):410-4.
2. Song H, Dicks E, Ramus SJ, Tyrer JP, Intermaggio MP, Hayward J, *et al.* Contribution of Germline Mutations in the RAD51B, RAD51C, and RAD51D Genes to Ovarian Cancer in the Population. *J Clin Oncol* **2015**;33(26):2901-7.
3. Oberg JA, Glade Bender JL, Sulis ML, Pendrick D, Sireci AN, Hsiao SJ, *et al.* Implementation of next generation sequencing into pediatric hematology-oncology practice: moving beyond actionable alterations. *Genome Med* **2016**;8(1):133.
4. Rokita JL, Rathil KS, Cardenas MF, Upton KA, Jayaseelan J, Cross KL, *et al.* Genomic Profiling of Childhood Tumor Patient-Derived Xenograft Models to Enable Rational Clinical Trial Design. *Cell Rep* **2019**;29(6):1675-89 e9.
5. Romero A, Perez-Segura P, Tosar A, Garcia-Saenz JA, Diaz-Rubio E, Caldes T, *et al.* A HRM-based screening method detects RAD51C germ-line deleterious mutations in Spanish breast and ovarian cancer families. *Breast Cancer Res Treat* **2011**;129(3):939-46.
6. Osorio A, Endt D, Fernandez F, Eirich K, de la Hoya M, Schmutzler R, *et al.* Predominance of pathogenic missense variants in the RAD51C gene occurring in breast and ovarian cancer families. *Hum Mol Genet* **2012**;21(13):2889-98.
7. Johnson BE, Mazor T, Hong C, Barnes M, Aihara K, McLean CY, *et al.* Mutational analysis reveals the origin and therapy-driven evolution of recurrent glioma. *Science* **2014**;343(6167):189-93.
8. Ding YC, Adamson AW, Steele L, Bailis AM, John EM, Tomlinson G, *et al.* Discovery of mutations in homologous recombination genes in African-American women with breast cancer. *Fam Cancer* **2018**;17(2):187-95.
9. Sanchez-Bermudez AI, Sarabia-Meseguer MD, Garcia-Aliaga A, Marin-Vera M, Macias-Cerrolaza JA, Henarejos PS, *et al.* Mutational analysis of RAD51C and RAD51D genes in hereditary breast and ovarian cancer families from Murcia (southeastern Spain). *Eur J Med Genet* **2018**;61(6):355-61.
10. Ghandi M, Huang FW, Jane-Valbuena J, Kryukov GV, Lo CC, McDonald ER, 3rd, *et al.* Next-generation characterization of the Cancer Cell Line Encyclopedia. *Nature* **2019**;569(7757):503-8.
11. Clague J, Wilhoite G, Adamson A, Bailis A, Weitzel JN, Neuhausen SL. RAD51C germline mutations in breast and ovarian cancer cases from high-risk families. *PLoS One* **2011**;6(9):e25632.
12. Blanco A, Gutierrez-Enriquez S, Santamarina M, Montalban G, Bonache S, Balmana J, *et al.* RAD51C germline mutations found in Spanish site-specific breast cancer and breast-ovarian cancer families. *Breast Cancer Res Treat* **2014**;147(1):133-43.
13. Thompson ER, Boyle SE, Johnson J, Ryland GL, Sawyer S, Choong DY, *et al.* Analysis of RAD51C germline mutations in high-risk breast and ovarian cancer families and ovarian cancer patients. *Hum Mutat* **2012**;33(1):95-9.
14. Cunningham JM, Cicek MS, Larson NB, Davila J, Wang C, Larson MC, *et al.* Clinical characteristics of ovarian cancer classified by BRCA1, BRCA2, and RAD51C status. *Sci Rep* **2014**;4:4026.
15. Kaisary AV, Grant RW. "Beehive on the bladder": an indication of colovesical disease. *Br J Urol* **1984**;56(1):35-7.

16. Sullivan MR, Prakash R, Rawal Y, Wang W, Sung P, Radke MR, *et al.* Long-term survival of an ovarian cancer patient harboring a RAD51C missense mutation. *Cold Spring Harb Mol Case Stud* **2021**;7(2) doi 10.1101/mcs.a006083.
17. Grobner SN, Worst BC, Weischenfeldt J, Buchhalter I, Kleinheinz K, Rudneva VA, *et al.* The landscape of genomic alterations across childhood cancers. *Nature* **2018**;555(7696):321-7.
18. Kondrashova O, Nguyen M, Shield-Artin K, Tinker AV, Teng NNH, Harrell MI, *et al.* Secondary Somatic Mutations Restoring RAD51C and RAD51D Associated with Acquired Resistance to the PARP Inhibitor Rucaparib in High-Grade Ovarian Carcinoma. *Cancer Discov* **2017**;7(9):984-98.
19. Jonson L, Ahlborn LB, Steffensen AY, Djursby M, Ejlertsen B, Timshel S, *et al.* Identification of six pathogenic RAD51C mutations via mutational screening of 1228 Danish individuals with increased risk of hereditary breast and/or ovarian cancer. *Breast Cancer Res Treat* **2016**;155(2):215-22.
20. Vaz F, Hanenberg H, Schuster B, Barker K, Wiek C, Erven V, *et al.* Mutation of the RAD51C gene in a Fanconi anemia-like disorder. *Nat Genet* **2010**;42(5):406-9.
21. Gayarre J, Martin-Gimeno P, Osorio A, Paumard B, Barroso A, Fernandez V, *et al.* Characterisation of the novel deleterious RAD51C p.Arg312Trp variant and prioritisation criteria for functional analysis of RAD51C missense changes. *Br J Cancer* **2017**;117(7):1048-62 doi 10.1038/bjc.2017.286.
22. Faltas BM, Prandi D, Tagawa ST, Molina AM, Nanus DM, Sternberg C, *et al.* Clonal evolution of chemotherapy-resistant urothelial carcinoma. *Nat Genet* **2016**;48(12):1490-9.

**Supplementary Table S3. RAD51 population variants from gnomAD.**

| Variant | Population        | Allele Count | Total Frequency |
|---------|-------------------|--------------|-----------------|
| R2G     | Latino            | 1/251270     | 3.98E-06        |
| R2S     | Latino            | 1/251270     | 3.98E-06        |
| R2C     | European          | 1/251270     | 3.98E-06        |
| G3R     | Most: European    | 11/282672    | 3.89E-05        |
| T5S     | East Asian        | 2/251382     | 7.96E-06        |
| T5P     | European          | 1/251382     | 3.98E-06        |
| T5M     | European          | 9/251372     | 3.58E-05        |
| T5R     | European          | 1/251372     | 3.98E-06        |
| F6L     | European          | 1/251398     | 3.98E-06        |
| F6Y     | European          | 1/251416     | 3.98E-06        |
| R7S     | African           | 1/251408     | 3.98E-06        |
| R7G     | European          | 1/251408     | 3.98E-06        |
| R7C     | South Asian       | 3/251408     | 1.19E-05        |
| F8I     | South Asian       | 1/251434     | 3.98E-06        |
| M10L    | African           | 1/31382      | 3.19E-05        |
| M10R    | European          | 2/251448     | 7.95E-06        |
| M10I    | European          | 1/251450     | 3.98E-06        |
| Q11R    | European          | 1/251450     | 3.98E-06        |
| R12G    | European          | 1/251456     | 3.98E-06        |
| R12W    | Most: African     | 2/251456     | 7.95E-06        |
| R12P    | South Asian       | 2/251448     | 7.95E-06        |
| D13G    | European          | 1/251462     | 3.98E-06        |
| S16G    | Most: European    | 5/251452     | 1.99E-05        |
| P18S    | Most: South Asian | 10/251454    | 3.98E-05        |
| P18L    | European          | 3/251452     | 1.19E-05        |
| S20F    | Latino            | 1/251470     | 3.98E-06        |
| P21A    | South Asian       | 1/251466     | 3.98E-06        |
| V23M    | East Asian        | 1/251470     | 3.98E-06        |
| R24Q    | East Asian        | 1/251464     | 3.98E-06        |
| V25M    | South Asian       | 2/251464     | 7.95E-06        |
| K26T    | European          | 2/251476     | 7.95E-06        |
| K26M    | European          | 2/282878     | 7.97E-06        |
| S29F    | South Asian       | 1/251474     | 3.98E-06        |
| A30V    | Latino            | 1/251464     | 3.98E-06        |
| G31R    | South Asian       | 1/251446     | 3.98E-06        |
| G31E    | European          | 2/251464     | 7.95E-06        |
| T34I    | South Asian       | 1/251470     | 3.98E-06        |

|       |                        |           |          |
|-------|------------------------|-----------|----------|
| A34T  | South Asian            | 1/251468  | 3.98E-06 |
| E36K  | European               | 4/251458  | 1.59E-05 |
| L39V  | European               | 1/251416  | 3.98E-06 |
| V41M  | South Asian            | 2/251432  | 7.95E-06 |
| V41L  | African                | 1/31398   | 3.18E-05 |
| P43S  | Latino                 | 1/251412  | 3.98E-06 |
| P43L  | East Asian             | 2/251416  | 7.95E-06 |
| S44A  | Latino                 | 1/251396  | 3.98E-06 |
| E45G  | Most: Ashkenazi Jewish | 15/251372 | 5.97E-05 |
| E45D  | African                | 1/215336  | 3.98E-06 |
| E49K  | East Asian             | 1/251294  | 3.98E-06 |
| E49G  | European               | 1/250514  | 3.99E-06 |
| G51V  | South Asian            | 1/250872  | 3.99E-06 |
| A55V  | Most: European         | 4/282586  | 1.42E-05 |
| I63M  | African                | 1/31404   | 3.18E-05 |
| I64V  | East Asian             | 1/251426  | 3.98E-06 |
| I64F  | European               | 1/251426  | 3.98E-06 |
| R65G  | European               | 1/251436  | 3.98E-06 |
| E67G  | Most: African          | 11/282858 | 3.89E-05 |
| T70P  | South Asian            | 1/251452  | 3.98E-06 |
| K72E  | European               | 2/251460  | 7.95E-06 |
| A76G  | Latino                 | 1/251462  | 3.98E-06 |
| G77A  | East Asian             | 1/251456  | 3.98E-06 |
| T78I  | East Asian             | 16/251456 | 6.36E-05 |
| K83R  | European               | 1/251458  | 3.98E-06 |
| K83T  | Latino                 | 1/251458  | 3.98E-06 |
| K84N  | European               | 2/251460  | 7.95E-06 |
| C85G  | East Asian             | 1/251464  | 3.98E-06 |
| E89K  | Latino                 | 1/251462  | 3.98E-06 |
| E92K  | European               | 1/251466  | 3.98E-06 |
| E94K  | European               | 1/251472  | 3.98E-06 |
| H95N  | Latino                 | 1/251466  | 3.98E-06 |
| T96S  | European               | 2/282856  | 7.07E-06 |
| T102S | European               | 1/251454  | 3.98E-06 |
| L107V | South Asian            | 1/251418  | 3.98E-06 |
| D109Y | European               | 1/251358  | 3.98E-06 |
| L111F | Latino                 | 3/251342  | 1.19E-05 |
| G112E | Latino                 | 1/251296  | 3.98E-06 |
| G112A | European               | 1/251296  | 3.98E-06 |



|       |                  |            |          |
|-------|------------------|------------|----------|
| G114R | African          | 1/31384    | 3.19E-05 |
| V115A | Other            | 1/251030   | 3.98E-06 |
| C124S | Latino           | 2/250522   | 7.98E-06 |
| G125S | European         | 1/250004   | 4.00E-06 |
| A126T | Most: European   | 981/281388 | 3.49E-03 |
| G130R | South Asian      | 1/248270   | 4.03E-06 |
| K131I | European         | 1/248530   | 4.02E-06 |
| K131R | South Asian      | 2/248530   | 8.05E-06 |
| Q133G | African          | 2/279268   | 7.16E-06 |
| L134S | East Asian       | 1/247194   | 4.05E-06 |
| C135A | South Asian      | 1/247152   | 4.05E-06 |
| M136L | East Asian       | 3/251476   | 1.19E-05 |
| M136I | Most: European   | 3/282870   | 1.06E-05 |
| L138F | European         | 1/251476   | 3.98E-06 |
| V140L | African          | 1/31400    | 3.18E-05 |
| V140G | European         | 1/251480   | 3.98E-06 |
| Q143R | European         | 9/251480   | 3.58E-05 |
| I144L | Latino           | 1/251478   | 3.98E-06 |
| I144T | Most: European   | 16/282878  | 5.66E-05 |
| P145L | African          | 1/31386    | 3.19E-05 |
| C147Y | European         | 1/251488   | 3.98E-06 |
| V151M | South Asian      | 5/251484   | 1.99E-05 |
| V151L | African          | 1/31402    | 3.18E-05 |
| A152S | European         | 1/251486   | 3.98E-06 |
| G153D | Most: Latino     | 2/251462   | 7.95E-06 |
| G154K | Latino           | 2/251458   | 7.95E-06 |
| A155T | European         | 1/251454   | 3.98E-06 |
| V156D | European         | 1/242482   | 4.12E-06 |
| F157I | European         | 1/251464   | 3.98E-06 |
| I158T | East Asian       | 1/251464   | 3.98E-06 |
| E161Q | South Asian      | 4/251466   | 1.59E-05 |
| G162E | European         | 1/251482   | 3.98E-06 |
| S163G | Most: East Asian | 2/251474   | 7.95E-06 |
| S163N | Latino           | 1/251476   | 3.98E-06 |
| F164L | Most: Latino     | 10/251476  | 3.98E-05 |
| V166A | European         | 2/251456   | 7.95E-06 |
| R168G | Latino           | 1/251478   | 3.98E-06 |
| R168K | Latino           | 1/251478   | 3.98E-06 |
| V169A | European         | 42/282840  | 1.48E-04 |

|       |                   |           |          |
|-------|-------------------|-----------|----------|
| L172V | Latino            | 1/251462  | 3.98E-06 |
| A175T | Most: European    | 6/251468  | 2.39E-05 |
| A175V | African           | 1/31394   | 3.19E-05 |
| H179Q | Latino            | 5/251476  | 1.99E-05 |
| Q181H | South Asian       | 1/251472  | 3.98E-06 |
| I183V | Most: European    | 3/251470  | 1.19E-05 |
| I183T | European          | 2/251468  | 7.95E-06 |
| A184T | European          | 2/251468  | 7.95E-06 |
| K188M | Latino            | 7/282878  | 2.47E-05 |
| G189R | European          | 1/251472  | 3.98E-06 |
| G189A | South Asian       | 1/251470  | 3.98E-06 |
| E190K | European          | 1/251456  | 3.98E-06 |
| R193Q | Most: European    | 4/282586  | 1.42E-05 |
| F199L | South Asian       | 1/251262  | 3.98E-06 |
| L201V | Ashkenazi Jewish  | 3/251262  | 1.19E-05 |
| N203D | Latino            | 2/251262  | 7.96E-06 |
| H207R | European          | 1/31390   | 3.19E-05 |
| H207Q | European          | 3/251246  | 1.19E-05 |
| I208V | European          | 3/251238  | 1.19E-05 |
| I208M | European          | 1/251250  | 3.98E-06 |
| R212C | Most: South Asian | 9/282638  | 3.18E-05 |
| R212H | Most: East Asian  | 25/282612 | 8.85E-05 |
| R214C | Most: African     | 22/282622 | 7.78E-05 |
| R214H | South Asian       | 2/251240  | 7.96E-06 |
| D215Y | European          | 1/31388   | 3.19E-05 |
| D215G | European          | 1/251266  | 3.98E-06 |
| Y216F | European          | 4/251256  | 1.59E-05 |
| L219S | Most: Latino      | 2/251286  | 7.96E-06 |
| F229L | European          | 2/251196  | 7.96E-06 |
| L230F | South Asian       | 1/251194  | 3.98E-06 |
| H233R | Most: South Asian | 6/251138  | 2.39E-05 |
| K235T | South Asian       | 4/251054  | 1.59E-05 |
| K235N | European          | 1/251038  | 3.98E-06 |
| R237Q | European          | 1/251386  | 3.98E-06 |
| R237P | South Asian       | 1/251386  | 3.86E-06 |
| V239L | South Asian       | 1/251408  | 3.98E-06 |
| I240L | European          | 1/251402  | 3.98E-06 |
| I240T | Most: Latino      | 5/251408  | 1.99E-05 |
| V241M | European          | 4/282792  | 1.41E-05 |

|       |                   |             |          |
|-------|-------------------|-------------|----------|
| I244V | Most: South Asian | 12/251422   | 4.77E-05 |
| R249C | European          | 1/251440    | 3.98E-06 |
| R249H | Most: African     | 5/251434    | 1.99E-05 |
| H250Y | European          | 3/251450    | 1.19E-05 |
| H250R | European          | 1/251448    | 3.98E-06 |
| N253G | European          | 1/251444    | 3.98E-06 |
| L257V | Most: Latino      | 9/251444    | 3.58E-05 |
| R258C | Most: European    | 7/251434    | 2.78E-05 |
| R258H | European          | 4/251428    | 1.59E-05 |
| T259A | South Asian       | 1/251410    | 3.98E-06 |
| T259S | Other             | 1/251436    | 3.98E-06 |
| R260W | Most: African     | 2/251438    | 7.96E-06 |
| R260P | European          | 3/251428    | 1.19E-05 |
| R260Q | Most: African     | 2/251428    | 7.95E-06 |
| L262V | Most: European    | 20/282828   | 7.07E-05 |
| G264S | Most: European    | 489/282814  | 1.73E-03 |
| L265V | European          | 1/251426    | 3.98E-06 |
| Q268H | South Asian       | 1/251432    | 3.98E-06 |
| N274D | Other             | 1/251408    | 3.98E-06 |
| L278F | South Asian       | 1/251388    | 3.98E-06 |
| T287A | Most: European    | 1594/282558 | 5.64E-03 |
| K289R | Latino            | 1/251176    | 3.98E-06 |
| I290T | European          | 1/31404     | 3.18E-05 |
| R292G | European          | 1/251148    | 3.98E-06 |
| A295T | African           | 4/251044    | 1.59E-05 |
| L297P | African           | 13/282450   | 4.60E-05 |
| L301F | South Asian       | 1/250832    | 3.99E-06 |
| A308T | African           | 1/251384    | 3.98E-06 |
| A308S | African           | 17/282782   | 6.01E-05 |
| A308G | African           | 1/251378    | 3.98E-06 |
| I311V | South Asian       | 1/251372    | 3.98E-06 |
| R312W | Most: East Asian  | 2/251360    | 7.96E-06 |
| R312Q | Most: European    | 6/251358    | 2.39E-05 |
| F315C | East Asian        | 1/251346    | 3.98E-06 |
| R319Q | Most: European    | 4/251264    | 1.59E-05 |
| L323W | African           | 1/251368    | 3.98E-06 |
| L326S | South Asian       | 1/251388    | 3.98E-06 |
| L326F | European          | 1/251370    | 3.98E-06 |
| T336P | Most: European    | 3/282810    | 1.06E-05 |

|       |                        |           |          |
|-------|------------------------|-----------|----------|
| D348V | European               | 3/250000  | 1.20E-05 |
| D348A | South Asian            | 1/250000  | 4.00E-06 |
| T349I | Most: South Asian      | 6/250090  | 2.40E-05 |
| V350L | South Asian            | 1/250192  | 4.00E-06 |
| V351I | East Asian             | 6/281672  | 2.13E-05 |
| T352N | Latino                 | 3/250484  | 3.99E-06 |
| A354V | European               | 2/250484  | 3.99E-06 |
| C355R | Ashkenazi Jewish       | 1/250634  | 3.99E-06 |
| T365P | Latino                 | 1/250100  | 4.00E-06 |
| T365S | European               | 1/249958  | 4.00E-06 |
| T365I | African                | 1/249958  | 4.00E-06 |
| R366W | Most: European         | 2/281028  | 7.12E-06 |
| R366Q | Most: Ashkenazi Jewish | 3/249618  | 1.20E-05 |
| R368W | Most: African          | 12/249298 | 4.81E-05 |
| R370Q | European               | 3/248394  | 1.21E-05 |
| E373A | South Asian            | 7/247376  | 2.83E-05 |

**Supplementary Table S3 legend.** RAD51 population variants from the Genome Aggregation Database (gnomad.broadinstitute.org) as of October 2021. Indicated are the mutation, population or most common population the variant is identified in, the variant allele count, and the total frequency. Note: “European” excludes individuals of Finnish descent. A126T and T287A have been observed in homozygous individuals (see **Table 2**), as has G264S.

**Supplementary Table S4. RAD51C variant predictions.**

| Mutation* | PolyPhen-2<br>(1, ≥0.957) | SIFT<br>(1, <0.05) | PROVEAN<br>(1, ≤-2.5) | Total<br>Score |
|-----------|---------------------------|--------------------|-----------------------|----------------|
| Q11R      | 0 (0.93)                  | 1 (0.023)          | 0 (-1.33)             | 1              |
| R12W      | 1 (1.00)                  | 1 (0.03)           | 1 (-3.82)             | 3              |
| P21A      | 0 (0.067)                 | 0 (0.184)          | 1 (-3.68)             | 1              |
| P21S      | 0 (0.054)                 | 1 (0.04)           | 1 (-4.01)             | 2              |
| K26M      | 1 (0.998)                 | 1 (0.001)          | 1 (-4.14)             | 3              |
| L27P      | 1 (1.00)                  | 1 (0.001)          | 1 (-5.1)              | 3              |
| A30E      | 1 (0.999)                 | 1 (0.002)          | 1 (-3.63)             | 3              |
| P43S      | 0 (0.467)                 | 0 (0.124)          | 1 (-3.89)             | 1              |
| L91F      | 1 (0.995)                 | 1 (0.027)          | 1 (-3.6)              | 3              |
| F103V     | 1 (0.993)                 | 0 (0.129)          | 1 (-5.26)             | 2              |
| D108Y     | 1 (1.00)                  | 1 (0.001)          | 1 (-8.67)             | 3              |
| G112V     | 1 (1.00)                  | 1 (0.001)          | 1 (-8.5)              | 3              |
| G113S     | 1 (1.00)                  | 1 (0.00)           | 1 (-5.97)             | 3              |
| T121R     | 1 (1.00)                  | 1 (0.001)          | 1 (-5.96)             | 3              |
| G125S     | 1 (1.00)                  | 1 (0.00)           | 1 (-5.98)             | 3              |
| G125V     | 1 (1.00)                  | 1 (0.00)           | 1 (-8.96)             | 3              |
| A126T#    | 0 (0.066)                 | 0 (0.144)          | 0 (-1.77)             | 0              |
| G130A     | 1 (1.00)                  | 1 (0.00)           | 1 (-5.98)             | 3              |
| T132P     | 1 (1.00)                  | 1 (0.00)           | 1 (-5.98)             | 3              |
| Q133K     | 1 (1.00)                  | 1 (0.00)           | 1 (-3.99)             | 3              |
| C135R     | 1 (0.999)                 | 0 (0.061)          | 1 (-6.48)             | 2              |
| C135Y     | 1 (1.00)                  | 1 (0.025)          | 1 (-6.12)             | 3              |
| M136L#    | 0 (0.006)                 | 0 (0.196)          | 0 (-1.09)             | 0              |
| L138F     | 1 (0.995)                 | 1 (0.003)          | 1 (-3.59)             | 3              |
| V140G     | 1 (0.986)                 | 1 (0.00)           | 1 (-6.39)             | 3              |
| D141G     | 0 (0.885)                 | 0 (0.2)            | 1 (-4.11)             | 1              |
| Q143R     | 0 (0.943)                 | 1 (0.004)          | 1 (-3.25)             | 2              |
| I144T#    | 0 (0.885)                 | 0 (0.078)          | 1 (-3.45)             | 1              |
| G153D     | 1 (1.00)                  | 1 (0.001)          | 1 (-6.34)             | 3              |
| G153S     | 1 (0.999)                 | 1 (0.006)          | 1 (-5.34)             | 3              |
| D159N     | 1 (1.00)                  | 1 (0.00)           | 1 (-4.65)             | 3              |
| G162E     | 1 (1.00)                  | 1 (0.002)          | 1 (-7.2)              | 3              |
| G162R     | 1 (1.00)                  | 1 (0.002)          | 1 (-7.17)             | 3              |
| R212C#    | 1 (1.00)                  | 1 (0.001)          | 1 (-7.2)              | 3              |
| R214C#    | 0 (0.001)                 | 0 (0.28)           | 0 (-1.52)             | 0              |
| L219S#    | 1 (1.00)                  | 1 (0.016)          | 1 (-3.49)             | 3              |
| Y224H     | 0 (0.001)                 | 0 (0.247)          | 0 (1.14)              | 0              |
| L226P     | 1 (1.00)                  | 1 (0.001)          | 1 (-6.23)             | 3              |
| P247L     | 0 (0.109)                 | 0 (0.302)          | 1 (-3.8)              | 1              |
| R249C#    | 1 (1.00)                  | 1 (0.00)           | 1 (-6.7)              | 3              |
| R249H     | 1 (0.967)                 | 1 (0.00)           | 1 (-4.16)             | 3              |
| L257V#    | 0 (0.238)                 | 0 (0.06)           | 0 (-1.99)             | 0              |
| R258H**   | 1 (1.00)                  | 1 (0.00)           | 1 (-4.13)             | 3              |
| R260W#    | 1 (1.00)                  | 1 (0.001)          | 1 (-5.73)             | 3              |
| L262V#    | 0 (0.883)                 | 1 (0.042)          | 0 (-2.38)             | 1              |
| A279V     | 0 (0.883)                 | 1 (0.044)          | 1 (-3.03)             | 2              |
| T287A#    | 1 (0.988)                 | 1 (0.00)           | 1 (-4.12)             | 3              |
| A308S#    | 0 (0.771)                 | 0 (0.308)          | 0 (-1.78)             | 0              |
| A308T     | 1 (0.992)                 | 1 (0.004)          | 1 (-2.71)             | 3              |
| R312W#    | 1 (1.00)                  | 1 (0.00)           | 1 (-6.9)              | 3              |
| D318E     | 0 (0.001)                 | 0 (1.00)           | 0 (0.75)              | 0              |
| A324T     | 1 (0.981)                 | 1 (0.03)           | 1 (-2.98)             | 3              |
| P330H     | 1 (0.997)                 | 1 (0.00)           | 1 (-7.17)             | 3              |
| T336P     | 0 (0.767)                 | 1 (0.026)          | 1 (-2.52)             | 2              |
| E360Q     | 0 (0.596)                 | 0 (0.196)          | 0 (-0.37)             | 0              |
| R366Q     | 1 (0.998)                 | 1 (0.031)          | 0 (-0.70)             | 2              |

**Supplementary Table S4.** *RAD51C* variants were scored for functional consequences using three predictive tools, Polymorphism Phenotyping version 2 (PolyPhen-2), Sorting Intolerant From Tolerant (SIFT), and Protein Variation Effect Analyzer (PROVEAN). For PolyPhen-2,  $\geq 0.957$  is considered probably damaging, while  $< 0.957$  is considered possibly damaging or benign. SIFT uses a binary cutoff in which  $< 0.05$  is damaging, while  $\geq 0.5$  is tolerated. PROVEAN also uses a binary cutoff, in this case  $\leq -2.5$  is considered deleterious, while  $> -2.5$  is considered neutral. The predictive score in the last column is the sum of the of the binary scores used for the three predictive tools.

PolyPhen-2: <http://genetics.bwh.harvard.edu/pph2/bgi.shtml>

SIFT: <https://sift.bii.a-star.edu.sg>

PROVEAN: [http://provean.jcvi.org/protein\\_batch\\_submit.php?species=human](http://provean.jcvi.org/protein_batch_submit.php?species=human)

**Supplementary Table S5. RAD51C variants identified in ovarian and breast cancer patients in this study.**

A.

| RAD51C missense | NM_058216 change | Patient | Allele origin | Tumor VAF | Age | Diagnosis         | Post-surgery          | Chemotherapy                             | Survival         |
|-----------------|------------------|---------|---------------|-----------|-----|-------------------|-----------------------|------------------------------------------|------------------|
| T132P           | c.394A>C         | 1       | germline      | 0.80      | 57  | Stage IIIC HGSPPC | no visible disease    | Cisplatin/Taxol                          | >10 years        |
| Q133K           | c.397C>A         | 1       | germline      | 0.69      | 70  | Stage IIIB HGSOC  | residual disease <1cm | Carboplatin/Taxol                        | 11 years         |
|                 | c.397C>A         | 2       | germline      | no sample | 45  | Stage II HGSC     |                       | Carboplatin/Taxol                        | relapse 3 months |
| R312W           | c.934C>T         | 1       | germline      | 1.00      | 58  | Stage IIIC HGSOC  | no residual disease   | Carboplatin/Taxol                        | >10 years        |
|                 | c.934C>T         | 2       | somatic       | 0.67      | 47  | Stage III OC      | metastatic            | Carboplatin/Taxol                        | 17 years         |
| G130A           | c.389G>C         | 1       | somatic       | 0.54      | 32  | Stage III BRCA    | no residual disease   | Adriamycin/Cycloph.<br>Taxol/Carboplatin | >3 years         |

B.

| Sample ID    | BROCA Version | Source   | Gene   | Chromosome (hg19) | HGVS DNA Reference | HGVS Protein Reference | Variant Type | Predicted Effect | dbSNP/dbVar ID | Genotype     | Allele Frequency | Target Coverage |
|--------------|---------------|----------|--------|-------------------|--------------------|------------------------|--------------|------------------|----------------|--------------|------------------|-----------------|
| T121R        |               |          |        |                   |                    |                        |              |                  |                |              |                  |                 |
| OCRFHG2724G  | HRv3          | Germline | RAD51C | chr17:56772508    | c.362C>G           | p.T121R                | substitution | pathogenic       | NA             | NA           | 0%               | 258             |
|              | HRv3          | Germline | BRCA2  | chr13:32914172    | c.5681dupA         | p.Tyr1894Terfs         | indel        | pathogenic       | rs80359527     | NA           | 0%               | 336             |
|              | HRv3          | Germline | TP53   | chr17:7577114     | c.824G>A           | p.C275Y                | substitution | pathogenic       | rs863224451    | NA           | 0%               | 241             |
| OCRFHG2724T  | HRv3          | Tumor    | RAD51C | chr17:56772508    | c.362C>G           | p.T121R                | substitution | pathogenic       | NA             | heterozygous | 24%              | 196             |
|              | HRv3          | Tumor    | BRCA2  | chr13:32914172    | c.5681dupA         | p.Tyr1894Terfs         | indel        | pathogenic       | rs80359527     | heterozygous | 33%              | 272             |
|              | HRv3          | Tumor    | TP53   | chr17:7577114     | c.824G>A           | p.C275Y                | substitution | pathogenic       | rs863224451    | homozygous   | 54%              | 267             |
| Q133K        |               |          |        |                   |                    |                        |              |                  |                |              |                  |                 |
| OCRFHG2986G  | HRv3          | Germline | RAD51C | chr17:56772543    | c.397C>A           | p.Q133K                | substitution | pathogenic       | rs387907159    | heterozygous | 53%              | 235             |
| OCRFHG2986T  | HRv3          | Tumor    | RAD51C | chr17:56772543    | c.397C>A           | p.Q133K                | substitution | pathogenic       | rs387907159    | homozygous   | 69%              | 194             |
| OCRFHG2986T  | HRv3          | Tumor    | TP53   | chr17:7577081     | c.857A>G           | p.E286G                | substitution | pathogenic       | rs1057519985   | homozygous   | 53%              | 156             |
| WHMayo.056   | HRv5          | Germline | RAD51C | chr17:56772543    | c.397C>A           | p.Q133K                | substitution | pathogenic       | rs387907159    | heterozygous | 46%              | 198             |
| WHMayo.055   | HRv5          | Germline | RAD51C | chr17:56772543    | c.397C>A           | p.Q133K                | substitution | pathogenic       | rs387907159    | heterozygous | 45%              | 152             |
| R312W        |               |          |        |                   |                    |                        |              |                  |                |              |                  |                 |
| JML.NCI.1356 | HRv6          | Tumor    | RAD51C | chr17:56801430    | c.934C>T           | p.R312W                | substitution | pathogenic       | rs730881932    | homozygous   | 100%             | 348             |
|              | HRv6          | Tumor    | TP53   | chr17:7578503     | c.427delG          | p.Val143Cysfs          | indel        | pathogenic       | NA             | homozygous   | 96%              | 158             |
| MayoEO.6560  | HRv6          | Tumor    | RAD51C | chr17:56801430    | c.934C>T           | p.R312W                | substitution | pathogenic       | rs730881932    | homozygous   | 67%              | 349             |
|              | HRv6          | Tumor    | TP53   | chr17:7574003     | c.1024C>T          | p.R342X                | substitution | pathogenic       | rs730882029    | homozygous   | 45%              | 112             |



C.

| Sample       | Mean Target Coverage | Total Reads (passed filter) | Total Aligned Reads | Percent Reads On Bait | Percent Usable Bases on Target | Percent Duplication | Estimated Library Size |
|--------------|----------------------|-----------------------------|---------------------|-----------------------|--------------------------------|---------------------|------------------------|
| T121R        |                      |                             |                     |                       |                                |                     |                        |
| OCRFHG2724T  | 160.1                | 7,918,094                   | 7,408,430           | 41.6%                 | 34.9%                          | 2.7%                | 73,406,094             |
| OCRFHG2724G  | 152.5                | 7,435,126                   | 7,205,662           | 42.5%                 | 35.4%                          | 3.7%                | 49,332,874             |
| Q133K        |                      |                             |                     |                       |                                |                     |                        |
| OCRFHG2986G  | 230.0                | NA                          | NA                  | NA                    | NA                             | NA                  | NA                     |
| OCRFHG2986T  | 194.0                | NA                          | NA                  | NA                    | NA                             | NA                  | NA                     |
| WHM Mayo.056 | 174.0                | NA                          | NA                  | NA                    | NA                             | NA                  | NA                     |
| WHM Mayo.055 | 216.0                | NA                          | NA                  | NA                    | NA                             | NA                  | NA                     |
| R312W        |                      |                             |                     |                       |                                |                     |                        |
| JML.NCI.1356 | 227.8                | 8,405,902                   | 7,933,091           | 64.9%                 | 53.2%                          | 17.4%               | 10,360,722             |
| MayoEO.6560  | 158.2                | 5,954,058                   | 5,518,311           | 62.7%                 | 52.1%                          | 4.5%                | 31,933,614             |

**Supplementary Table S5. RAD51C variants identified in ovarian and breast cancer patients in this study.**

**A.** RAD51C variants identified in ovarian cancer patients through BROCA sequencing. Tumor DNA was not sequenced for Q133K mutation Patient 2 so that the variant allele frequency (VAF) could not be determined. The age at diagnosis is indicated. The patient with the T132P variant has been previously reported. In addition, the somatic variant G130A was identified in a triple negative breast cancer patient through MSK clinical sequencing. In this case, tumor purity was 50%; LOH is indicated due to the low tumor purity confirmed by the presence of a TP53 mutation (Q53\*) at a VAF of 0.32.

**B.** BROCA sequencing results. The BROCA versions used are indicated (HRv3, HRv5, HRv6).

**C.** Sequencing quality control.
